# Supplementary material for: Catalytic 1,2-dihydronaphthalene and E-aryl-diene synthesis via CoIII–Carbene radical and o-quinodimethane intermediates
Source: Royal Society of Chemistry journal article supplement (doi:10.1039/c7sc03909c), 2017-01-01
Supplement: c7sc03909c1.pdf [file c7sc03909c1.pdf]

# Supporting Information

Belonging to the paper

## **Catalytic 1,2-Dihydronaphthalene and *E*-Aryl-Diene Synthesis via Co<sup>III</sup>-Carbene Radical and *o*-Quinodimethane Intermediates**

Colet te Grotenhuis<sup>†</sup>, Braja G. Das<sup>†</sup>, Petrus F. Kuijpers, Wouter Hageman, Mees Trouwborst and Bas de Bruin<sup>\*</sup>

Homogeneous, Supramolecular and Bio-Inspired Catalysis (HomKat) group, Van 't Hoff Institute for Molecular Sciences (HIMS), University of Amsterdam, Science Park 904, 1098 XH Amsterdam, The Netherlands.

E-mail: b.debruin@uva.nl

### **Contents**

|                                          |     |
|------------------------------------------|-----|
| Experimental data                        | S1  |
| NMR kinetic Investigations               | S21 |
| Spin Trapping                            | S24 |
| Radical Trapping                         | S27 |
| List of Abbreviations                    | S28 |
| Computational details                    | S29 |
| Energy Tables                            | S30 |
| Optimized geometries                     | S36 |
| References in the supporting information | S56 |

## Experimental data.

### General Considerations

All manipulations were performed under a nitrogen atmosphere using standard Schlenk techniques. All solvents used for catalysis were dried over and distilled from sodium (toluene) or CaH<sub>2</sub> (dichloromethane, hexane, ethyl acetate, methanol). All chemicals were purchased from commercial suppliers (either from Sigma-Aldrich or Fluorochem) and used without further purification. NMR spectra (<sup>1</sup>H, <sup>13</sup>C and <sup>19</sup>F) were measured on a Bruker DRX 500, Bruker AMX 400, Bruker DRX 300 or on a Varian Mercury 300 spectrometer at r.t. unless noted otherwise. Individual peaks are reported as: multiplicity (s = singlet, d = doublet, t = triplet, q = quartet, m = multiplet), integration, coupling constant in Hz. Mass spectra of the newly synthesized compounds were recorded on an Agilent-5973 GC-MS spectrometer, and the corresponding HRMS data were recorded on a JEOL AccuTOF 4G via direct injection probe using CSI (Cold Spray Ionization). EPR spectra were recorded on a Bruker EMXplus spectrometer at room temperature (298 K).

### General Procedure A, aldehyde protection.

2-bromobenzaldehyde (1 eq), ethylene glycol (5 eq) and *p*-toluene sulfonic acid (0.03 eq) were combined in toluene (0.5 M) and refluxed for 24h. After cooling down the solution was extracted with water and EtOAc, after which the organic layers were dried over MgSO<sub>4</sub>. The solvent was evaporated and column chromatography yielded the pure product.

#### 2-(2-bromophenyl)-1,3-dioxolane

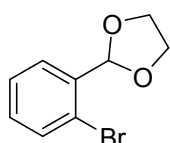

The reaction was performed according to general procedure A. The product was isolated after column chromatography (hexanes → 20:1 hexanes:EtOAc) as a colorless liquid (90%).

<sup>1</sup>H NMR (300 MHz, CDCl<sub>3</sub>) δ 7.68 – 7.55 (m, 2H), 7.37 (td, *J* = 7.6, 1.3 Hz, 1H), 7.25 (td, *J* = 7.6, 1.8 Hz, 1H), 6.13 (s, 1H), 4.24 – 4.03 (m, 4H). <sup>13</sup>C NMR (75 MHz, CDCl<sub>3</sub>) δ 136.62, 133.00, 130.64, 127.83, 127.45, 122.96, 102.64, 65.51.

#### 2-(2-bromo-5-fluorophenyl)-1,3-dioxolane

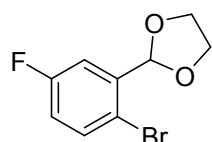

The reaction was performed according to general procedure A. The product was isolated after column chromatography (40:1 hexanes:EtOAc) as a colorless liquid (95%, 97% based on recovery of starting material).

<sup>1</sup>H NMR (300 MHz, CDCl<sub>3</sub>) δ 7.54 (dd, *J* = 8.7, 5.1 Hz, 1H), 7.35 (dd, *J* = 9.3, 3.1 Hz, 1H), 6.98 (ddd, *J* = 8.7, 7.7, 3.1 Hz, 1H), 6.07 (d, *J* = 1.4 Hz, 1H), 4.26 – 4.01 (m, 4H). <sup>13</sup>C NMR (75 MHz, CDCl<sub>3</sub>) δ 161.99 (d, *J* = 247.3 Hz), 138.93 (d, *J* = 6.9 Hz), 134.27 (d, *J* = 7.7 Hz), 117.75 (d, *J* = 22.7 Hz), 116.82 (d, *J* = 3.3 Hz), 115.13 (d, *J* = 24.3 Hz), 102.02 (d, *J* = 1.3 Hz), 65.56 (s). <sup>19</sup>F NMR (282 MHz, CDCl<sub>3</sub>) δ -113.93 (s).

#### 2-(2-bromo-4-fluorophenyl)-1,3-dioxolane

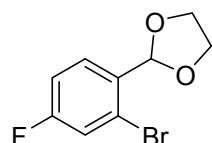

The reaction was performed according to general procedure A. The product was isolated after column chromatography (9:1 hexanes:EtOAc) as a yellow oil (71%).

<sup>1</sup>H NMR (300 MHz, CDCl<sub>3</sub>) δ 7.59 (dd, *J* = 8.7, 6.1 Hz, 1H), 7.31 (dd, *J* = 8.3, 2.6 Hz, 1H), 7.05 (td, *J* = 8.3, 2.6 Hz, 1H), 6.04 (s, 1H), 4.29 – 3.94 (m, 4H).

### 2-(2-bromo-5-(trifluoromethyl)phenyl)-1,3-dioxolane

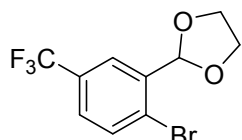

The reaction was performed according to general procedure A. The product was isolated after column chromatography (20:1 hexanes:EtOAc) as a colorless liquid (84%, 93% based on recovery of starting material).

$^1\text{H NMR}$  (300 MHz,  $\text{CDCl}_3$ )  $\delta$  7.86 (d,  $J = 2.2$  Hz, 1H), 7.70 (d,  $J = 8.3$  Hz, 1H), 7.48 (dd,  $J = 8.3, 2.2$  Hz, 1H), 6.10 (s, 1H), 4.14 (ddt,  $J = 19.4, 9.0, 6.4$  Hz, 4H).  $^{13}\text{C NMR}$  (75 MHz,  $\text{CDCl}_3$ )  $\delta$  138.03 (s), 133.75 (s), 130.16 (q,  $J = 33.0$  Hz, ArC-CF<sub>3</sub>), 127.32 (q,  $J = 3.7$  Hz), 126.94 (s), 125.06 (q,  $J = 3.7$  Hz), 123.83 (q,  $J = 272.7$  Hz, CF<sub>3</sub>), 102.03 (s, Ar-CH-O), 65.78 (s, O-CH<sub>2</sub>CH<sub>2</sub>-O).  $^{19}\text{F NMR}$  (282 MHz,  $\text{CDCl}_3$ )  $\delta$  -62.73.

### 2-(2-bromo-4-methylphenyl)-1,3-dioxolane

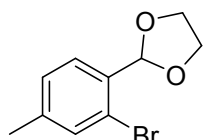

The reaction was performed according to general procedure A. The product was isolated after column chromatography (20:1 hexanes:EtOAc) as a colorless liquid (89%).

$^1\text{H NMR}$  (300 MHz,  $\text{CDCl}_3$ )  $\delta$  7.49 (dd,  $J = 7.9, 1.8$  Hz, 1H), 7.41 (d,  $J = 1.6$  Hz, 1H), 7.20 – 7.09 (m, 1H), 6.09 (s, 1H), 4.41 – 3.92 (m, 4H), 2.35 (s, 3H).

### 2-(2-bromo-5-methoxyphenyl)-1,3-dioxolane

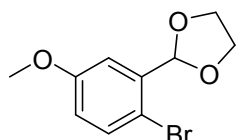

The reaction was performed according to general procedure A. The product was isolated after column chromatography (1:0 → 20:1 hexanes:EtOAc) as a colorless liquid (66%).

$^1\text{H NMR}$  (400 MHz,  $\text{CDCl}_3$ )  $\delta$  7.46 (d,  $J = 8.7$  Hz, 1H), 7.18 (d,  $J = 3.1$  Hz, 1H), 6.81 (dd,  $J = 8.7, 3.1$  Hz, 1H), 6.06 (s, 1H), 4.23 – 4.03 (m, 4H), 3.82 (s, 3H).

### 2-(2-bromo-4,5-dimethoxyphenyl)-1,3-dioxolane

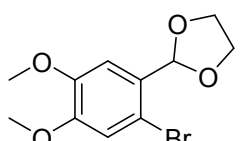

The reaction was performed according to general procedure A. The product was isolated after column chromatography (4:1 hexanes:EtOAc) as a white solid (56%, 83% based on recovery of starting material).

$^1\text{H NMR}$  (400 MHz,  $\text{CDCl}_3$ )  $\delta$  7.11 (s, 1H), 7.01 (s, 1H), 5.99 (s, 1H), 4.26 – 3.98 (m, 4H), 3.89 (s, 3H), 3.88 (s, 3H).

### General Procedure B, aldehyde introduction.

2-(2-bromophenyl)-1,3-dioxolane (1 eq) in THF (0.5 M) was cooled down to  $-78^\circ\text{C}$ . Then n-BuLi (1.5 eq) was added dropwise and stirred for 20 min. Next N,N-DMF (2 eq) was added dropwise and the mixture was allowed to warm to  $0^\circ\text{C}$ . The reaction was then quenched by addition of sat.  $\text{NH}_4\text{Cl}$  and water. This was extracted with EtOAc, the combined organic layers were dried over  $\text{MgSO}_4$  and concentrated in vacuo. The product was purified by column chromatography.

### 2-(1,3-dioxolane-2-yl)benzaldehyde

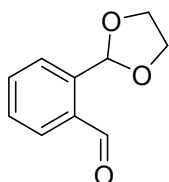

The reaction was performed according to general procedure B. The product was isolated after column chromatography (9:1 H:Et) and obtained as a yellow liquid (87%).

$^1\text{H NMR}$  (400 MHz,  $\text{CDCl}_3$ )  $\delta$  10.44 (s, 1H), 7.96 (dd,  $J = 7.5, 1.5$  Hz, 1H), 7.76 (dd,  $J = 7.5, 1.3$  Hz, 1H), 7.64 (td,  $J = 7.5, 1.5$  Hz, 1H), 7.55 (td,  $J = 7.5, 1.3$  Hz, 1H), 6.43 (s, 1H), 4.29 – 4.03 (m, 4H).  $^{13}\text{C NMR}$  (75 MHz,  $\text{CDCl}_3$ )  $\delta$  191.82, 139.06, 134.46, 133.66, 130.20, 129.48, 127.01, 101.12, 65.39.

### 2-(1,3-dioxolan-2-yl)-4-fluorobenzaldehyde

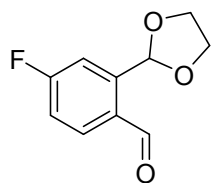

The reaction was performed according to general procedure B. The product was isolated after column chromatography (4:1 H:Et) and obtained as a yellow oil (97%).

$^1\text{H}$  NMR (300 MHz,  $\text{CDCl}_3$ )  $\delta$  10.34 (s, 1H), 7.99 (dd,  $J$  = 8.6, 5.7 Hz, 1H), 7.47 (dd,  $J$  = 9.6, 2.6 Hz, 1H), 7.20 (td,  $J$  = 8.2, 2.6 Hz, 1H), 6.46 (s, 1H), 4.27 – 4.02 (m, 4H).  $^{13}\text{C}$

NMR (75 MHz,  $\text{CDCl}_3$ )  $\delta$  190.01 (s), 165.83 (d,  $J$  = 256.6 Hz), 142.89 (d,  $J$  = 8.2 Hz), 133.16 (d,  $J$  = 9.5 Hz), 130.81 (d,  $J$  = 2.9 Hz), 116.39 (d,  $J$  = 21.9 Hz), 114.20 (d,  $J$  = 24.0 Hz), 99.87 (d,  $J$  = 1.4 Hz), 65.50 (s).  $^{19}\text{F}$  NMR (282 MHz,  $\text{CDCl}_3$ )  $\delta$  -102.70 (s). IR (neat)  $\nu$  2960, 2892, 1693, 1604, 1588, 1236, 1160, 1112, 1065, 825  $\text{cm}^{-1}$ . HRMS(FD $^+$ ) calcd. for  $\text{C}_{10}\text{H}_9\text{FO}_3$  [M] $^+$  196.05357, found 196.05364.

### 2-(1,3-dioxolan-2-yl)-5-fluorobenzaldehyde

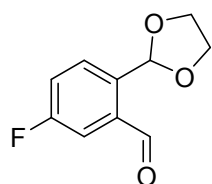

The reaction was performed according to general procedure B. The product was isolated after column chromatography (20:1  $\rightarrow$  9:1 hexanes:EtOAc) as a yellow oil (51%).

$^1\text{H}$  NMR (300 MHz,  $\text{CDCl}_3$ )  $\delta$  10.40 (d,  $J$  = 2.5 Hz, 1H), 7.70 (dd,  $J$  = 8.6, 5.2 Hz, 1H), 7.61 (dd,  $J$  = 8.8, 2.8 Hz, 1H), 7.28 (td,  $J$  = 8.2, 2.8 Hz, 1H), 6.29 (s, 1H), 4.23 – 3.97

(m, 4H).  $^{19}\text{F}$  NMR (282 MHz,  $\text{CDCl}_3$ )  $\delta$  -111.10.

### 2-(1,3-dioxolan-2-yl)-4-(trifluoromethyl)benzaldehyde

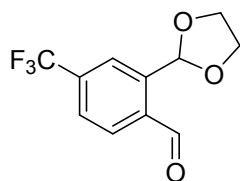

The reaction was performed according to general procedure B. The product was isolated after column chromatography (4:1 hexanes:EtOAc) as a yellow oil (64%).

$^1\text{H}$  NMR (300 MHz,  $\text{CDCl}_3$ )  $\delta$  10.47 (s, 1H), 8.10 – 7.96 (m, 2H), 7.78 (d,  $J$  = 8.1 Hz, 1H), 6.41 (s, 1H), 4.29 – 3.97 (m, 4H).  $^{19}\text{F}$  NMR (282 MHz,  $\text{CDCl}_3$ )  $\delta$  -63.21.

### 2-(1,3-dioxolan-2-yl)-5-methylbenzaldehyde

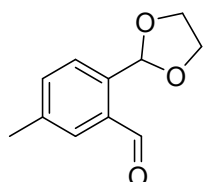

The reaction was performed according to general procedure B. The product was isolated after column chromatography (3:1 hexanes:EtOAc) as a yellow liquid (75%).

$^1\text{H}$  NMR (300 MHz,  $\text{CDCl}_3$ )  $\delta$  10.38 (s, 1H), 7.73 (d,  $J$  = 1.8 Hz, 1H), 7.60 (d,  $J$  = 7.9 Hz, 1H), 7.41 (dd,  $J$  = 7.9, 1.8 Hz, 1H), 6.35 (s, 1H), 4.30 – 3.87 (m, 4H), 2.42 (s, 3H).  $^{13}\text{C}$

NMR (75 MHz,  $\text{CDCl}_3$ )  $\delta$  192.17, 139.71, 136.35, 134.48, 134.43, 130.75, 127.31, 101.37, 65.44, 21.17. IR (neat)  $\nu$  2957, 2923, 2890, 1691, 1072, 823  $\text{cm}^{-1}$ . HRMS(EI $^+$ ) calcd. for  $\text{C}_{11}\text{H}_{12}\text{O}_3$  [M] $^+$  192.0786, found 192.0782.

### 2-(1,3-dioxolan-2-yl)-4-methoxybenzaldehyde

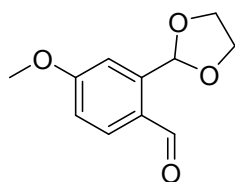

The reaction was performed according to general procedure B. The product was isolated after column chromatography (7:3 hexanes:EtOAc) and obtained as a yellow oil (94%).

$^1\text{H}$  NMR (400 MHz,  $\text{CDCl}_3$ )  $\delta$  10.25 (s, 1H), 7.92 (d,  $J$  = 8.6 Hz, 1H), 7.33 – 7.23 (m, 1H), 7.00 (dd,  $J$  = 8.6, 2.6 Hz, 1H), 6.47 (s, 1H), 4.22 – 4.03 (m, 4H), 3.92 (s, 3H).

$^{13}\text{C}$  NMR (101 MHz,  $\text{CDCl}_3$ )  $\delta$  190.20, 163.79, 141.57, 133.25, 127.56, 114.21, 112.07, 100.30, 65.28, 55.53.

### 2-(1,3-dioxolan-2-yl)-4,5-dimethoxybenzaldehyde

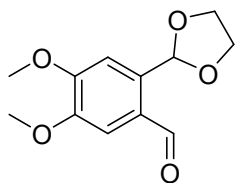

The reaction was performed according to general procedure B. The product was isolated after column chromatography (1:1 hexanes:EtOAc) as a white solid (88%).

$^1\text{H NMR}$  (300 MHz,  $\text{CDCl}_3$ )  $\delta$  10.34 (s, 1H), 7.47 (s, 1H), 7.21 (s, 1H), 6.36 (s, 1H), 4.28 – 4.04 (m, 4H), 3.98 (s, 3H), 3.95 (s, 3H).

### General Procedure C, Horner-Wadsworth-Emmons reaction.

A Schlenk was charged with NaH (60% in oil, 1.2 eq) and THF was added. After cooling to 0°C the phosphonate was slowly added and the mixture was stirred for 30 min. 2-(1,3-dioxolane-2-yl)benzaldehyde (1 eq) was then slowly added and the mixture was stirred for another 30 min. Then the mixture was extracted with  $\text{Et}_2\text{O}$  and sat.  $\text{NaHCO}_3$ , washed with brine and dried over  $\text{MgSO}_4$ . The product was used without further purification.

### ethyl (E)-3-(2-(1,3-dioxolan-2-yl)phenyl)-2-methylacrylate

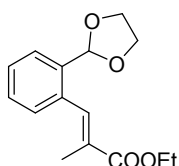

The reaction was performed according to general procedure C. The product was obtained as a colorless liquid and used without further purification.

$^1\text{H NMR}$  (400 MHz,  $\text{CDCl}_3$ )  $\delta$  7.94 (br s, 1H), 7.59 (dd,  $J = 7.3, 1.9$  Hz, 1H), 7.41 – 7.31 (m, 2H), 7.22 (dd,  $J = 6.9, 2.1$  Hz, 1H), 5.85 (s, 1H), 4.27 (q,  $J = 7.1$  Hz, 2H), 4.19 – 3.90 (m, 4H), 1.93 (d,  $J = 1.5$  Hz, 3H), 1.35 (t,  $J = 7.1$  Hz, 3H).

### ethyl (E)-3-(2-(1,3-dioxolan-2-yl)-4-fluorophenyl)-2-methylacrylate

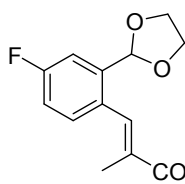

The reaction was performed according to general procedure C. The product was obtained as a yellow oil and used without further purification.

$^1\text{H NMR}$  (300 MHz,  $\text{CDCl}_3$ )  $\delta$  7.95 – 7.81 (m, 1H), 7.32 (dd,  $J = 9.5, 2.8$  Hz, 1H), 7.21 (dd,  $J = 5.6, 0.8$  Hz, 1H), 7.19 (dd,  $J = 5.5, 0.8$  Hz, 1H), 7.06 (td,  $J = 8.3, 2.8$  Hz, 1H), 5.83 (d,  $J = 1.2$  Hz, 1H), 4.27 (q,  $J = 7.1$  Hz, 2H), 4.19 – 3.98 (m, 4H), 1.92 (d,  $J = 1.5$  Hz, 3H), 1.34 (t,  $J = 7.2$  Hz, 3H).  $^{19}\text{F NMR}$  (282 MHz,  $\text{CDCl}_3$ )  $\delta$  -112.81 (s).

### ethyl (E)-3-(2-(1,3-dioxolan-2-yl)-5-fluorophenyl)-2-methylacrylate

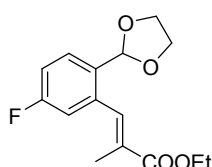

The reaction was performed according to general procedure C. The product was obtained as a yellow oil and used without further purification.

$^1\text{H NMR}$  (300 MHz,  $\text{CDCl}_3$ )  $\delta$  7.85 (s, 1H), 7.57 (dd,  $J = 8.6, 5.9$  Hz, 1H), 7.03 (td,  $J = 8.3, 2.5$  Hz, 1H), 6.92 (dd,  $J = 9.5, 2.6$  Hz, 1H), 5.80 (s, 1H), 4.27 (q,  $J = 7.1$  Hz, 2H), 4.20 – 3.89 (m, 4H), 1.93 (d,  $J = 1.6$  Hz, 3H), 1.35 (t,  $J = 7.1$  Hz, 3H).  $^{19}\text{F NMR}$  (282 MHz,  $\text{CDCl}_3$ )  $\delta$  -112.40.

### ethyl (E)-3-(2-(1,3-dioxolan-2-yl)-4-(trifluoromethyl)phenyl)-2-methylacrylate

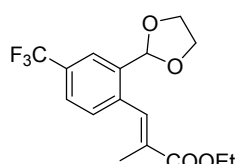

The reaction was performed according to general procedure C. The product was obtained as a yellowish oil and used without further purification.

$^1\text{H NMR}$  (300 MHz,  $\text{CDCl}_3$ )  $\delta$  7.84 – 7.67 (m, 2H), 7.50 (dd,  $J = 8.1, 2.0$  Hz, 1H), 7.21 (d,  $J = 8.0$  Hz, 1H), 5.72 (s, 1H), 4.14 (q,  $J = 7.1$  Hz, 2H), 4.10 – 3.95 (m, 4H), 1.78 (d,  $J = 1.6$  Hz, 3H), 1.21 (t,  $J = 7.2$  Hz, 3H).  $^{19}\text{F NMR}$  (282 MHz,  $\text{CDCl}_3$ )  $\delta$  -62.67.

### ethyl (E)-3-(2-(1,3-dioxolan-2-yl)-5-methylphenyl)-2-methylacrylate

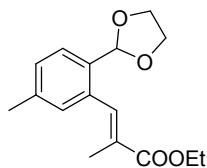

The reaction was performed according to general procedure C. The product was obtained as a yellowish oil and used without further purification.

$^1\text{H}$  NMR (300 MHz,  $\text{CDCl}_3$ )  $\delta$  7.90 (s, 1H), 7.46 (d,  $J = 7.9$  Hz, 1H), 7.15 (d,  $J = 7.9$  Hz, 1H), 7.02 (s, 1H), 5.81 (s, 1H), 4.27 (q,  $J = 7.1$  Hz, 2H), 4.19 – 3.96 (m, 4H), 2.36 (s, 3H,  $\text{CH}_3\text{Ar}$ ), 1.93 (d,  $J = 1.5$  Hz, 3H,  $\text{CH}_3\text{-allyl}$ ), 1.34 (t,  $J = 7.1$  Hz, 3H).

### ethyl (E)-3-(2-(1,3-dioxolan-2-yl)-4-methoxyphenyl)-2-methylacrylate

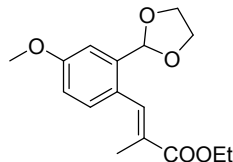

The reaction was performed according to general procedure C. The product was obtained as a yellowish oil and used without further purification.

$^1\text{H}$  NMR (300 MHz,  $\text{CDCl}_3$ )  $\delta$  7.92 (d,  $J = 1.6$  Hz, 1H), 7.22 (d,  $J = 8.6$  Hz, 1H), 7.18 (d,  $J = 2.8$  Hz, 1H), 6.93 (dd,  $J = 8.5, 2.8$  Hz, 1H), 5.87 (s, 1H), 4.29 (q,  $J = 7.1$  Hz, 2H), 4.22 – 4.02 (m, 4H), 3.86 (s, 3H, OMe), 1.99 (d,  $J = 1.5$  Hz, 3H, allyl), 1.37 (t,  $J = 7.1$  Hz, 3H).

= 7.1 Hz, 3H).

### ethyl (E)-3-(2-(1,3-dioxolan-2-yl)-4,5-dimethoxyphenyl)-2-methylacrylate

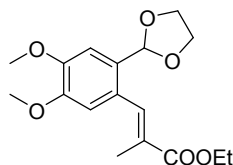

The reaction was performed according to general procedure C. The product was obtained as a light green oil and used without further purification.

$^1\text{H}$  NMR (300 MHz,  $\text{CDCl}_3$ )  $\delta$  7.61 (br s, 1H, allyl), 7.16 (s, 1H), 6.92 (s, 1H), 6.03 (s, 1H), 3.98 (q,  $J = 7.0$  Hz, 2H), 3.90 – 3.83 (m, 4H,  $\text{OCH}_2\text{CH}_2\text{O}$ ), 3.68 (s, 3H, OMe), 3.63 (s, 3H, OMe), 1.70 (d,  $J = 1.7$  Hz, 3H,  $\text{CH}_3\text{-allyl}$ ), 1.06 (t,  $J = 7.1$ , 3H).

### 2-(2-(2-methylprop-1-en-1-yl)phenyl)-1,3-dioxolane

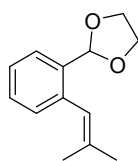

Under Schlenk conditions isopropyltriphenylphosphonium iodide was dissolved in THF and cooled down to  $-78$  °C. Next BuLi was added dropwise and the solution was stirred for 1h at  $-78$  °C and 1h at room temperature. Then the aldehyde was added and the solution was stirred for another 2h after which the reaction was quenched with water and extracted with DCM. The combined organic layers were washed with brine, dried over  $\text{MgSO}_4$  and concentrated. The mixture was then purified by column chromatography (40:1 hexanes:EtOAc) to give the product as a colorless liquid (40%).

$^1\text{H}$  NMR (300 MHz,  $\text{CDCl}_3$ )  $\delta$  7.57 (dd,  $J = 7.4, 1.7$  Hz, 1H), 7.37 – 7.19 (m, 2H), 7.14 (dd,  $J = 7.4, 1.7$  Hz, 1H), 6.40 (s, 1H), 5.92 (s, 1H), 4.26 – 3.85 (m, 4H), 1.91 (d,  $J = 1.4$  Hz, 3H), 1.69 (d,  $J = 1.3$  Hz, 3H).  $^{13}\text{C}$  NMR (75 MHz,  $\text{CDCl}_3$ )  $\delta$  138.17, 136.70, 135.37, 130.11, 128.78, 126.60, 125.83, 122.57, 101.79, 65.51, 26.23, 19.52.

### 2-(2-(cyclohexylidenemethyl)phenyl)-1,3-dioxolane

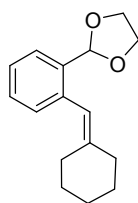

Under Schlenk conditions at  $10^\circ\text{C}$  cyclohexyltriphenylphosphonium bromide (1 eq) in  $\text{Et}_2\text{O}$  (0.4M) was treated with n-BuLi (2.5M, 1.1 eq), The salt gradually dissolved to give a blood red solution. This was stirred for another 1.5h. Then a solution of 2-(1,3-dioxolane-2-yl)benzaldehyde (1.01 eq) in  $\text{Et}_2\text{O}$  (1.5M) was added slowly and the mixture was stirred over night at room temperature. The mixture was then concentrated, hexanes was added and a filtration was done to remove triphenylphosphine oxide. The filtrate was concentrated and extracted with  $\text{Et}_2\text{O}$ , washed with brine, dried over  $\text{MgSO}_4$  and concentrated again to give the product as a white oil which was used without further purification

$^1\text{H}$  NMR (300 MHz,  $\text{CDCl}_3$ )  $\delta$  7.56 (dd,  $J = 7.3, 1.9$  Hz, 1H), 7.36 – 7.20 (m, 2H), 7.17 – 7.08 (m, 1H), 6.34 (s, 1H), 5.94 (s, 1H), 4.22 – 3.95 (m, 4H), 2.33 – 2.22 (m, 2H), 2.19 – 2.10 (m, 2H), 1.73 – 1.45 (m, 6H).

### ethyl (E)-2-(2-(1,3-dioxolan-2-yl)benzylidene)butanoate

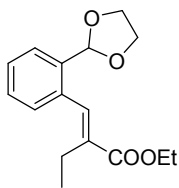

The reaction was performed according to general procedure C. The product was obtained as a yellow oil and used without further purification.

$^1\text{H}$  NMR (400 MHz,  $\text{CDCl}_3$ )  $\delta$  7.89 (s, 1H), 7.60 (dd,  $J = 7.0, 2.2$  Hz, 1H), 7.42 – 7.33 (m, 2H), 7.21 (dd,  $J = 6.5, 2.3$  Hz, 1H), 5.85 (s, 1H), 4.29 (q,  $J = 7.2$  Hz, 2H), 4.19 – 3.98 (m, 4H), 2.36 (q,  $J = 7.4$  Hz, 2H), 1.07 (t,  $J = 7.4$  Hz, 3H), 1.00 (td,  $J = 7.4, 1.0$  Hz, 3H).

### ethyl 2-(diethoxyphosphoryl)pentanoate

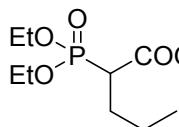

Under Schlenk conditions  $\text{KO}^t\text{Bu}$  (1,1 eq) was added at  $0^\circ\text{C}$  to a solution of ethyl 2-(diethoxyphosphoryl)acetate (1 eq) in DMSO (1.0 M). This mixture was stirred at room temperature until the  $\text{KO}^t\text{Bu}$  was dissolved. Then 1-bromopropane (1,1 eq) was added. Next the solution was stirred for 1 hour at  $60^\circ\text{C}$ . Finally the mixture

was poured into a saturated ammonium chloride solution and extracted with ether. The combined organic layers were washed with brine, dried over magnesium sulfate and concentrated to yield the product as a colorless liquid (93%).

$^1\text{H}$  NMR (300 MHz,  $\text{CDCl}_3$ )  $\delta$  4.32 – 4.06 (m, 6H), 3.07 – 2.83 (m, 1H), 2.08 – 1.69 (m, 2H), 1.56 – 1.22 (m, 11H), 0.92 (t,  $J = 7.3$  Hz, 3H).  $^{31}\text{P}$  NMR (121 MHz,  $\text{CDCl}_3$ )  $\delta$  22.96. HRMS(EI $^+$ ) calcd. for  $\text{C}_9\text{H}_{18}\text{O}_5\text{P}$  [M-Et] $^+$  237.08918, found 237.08902.

### ethyl (E)-2-(2-(1,3-dioxolan-2-yl)benzylidene)pentanoate

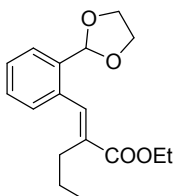

The reaction was performed according to general procedure C. The product was obtained as a yellow oil and used without further purification.

$^1\text{H}$  NMR (400 MHz,  $\text{CDCl}_3$ )  $\delta$  7.88 (s, 1H), 7.61 – 7.55 (m, 1H), 7.43 – 7.30 (m, 2H), 7.22 – 7.14 (m, 1H), 5.83 (s, 1H), 4.27 (q,  $J = 7.1$  Hz, 2H), 4.19 – 3.97 (m, 4H), 2.35 – 2.23 (m, 2H), 1.51 – 1.40 (m, 2H), 1.34 (t,  $J = 7.1$  Hz, 3H), 0.84 (t,  $J = 7.4$  Hz, 3H).

### ethyl 2-(diethoxyphosphoryl)-3-methylbutanoate

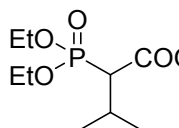

Under Schlenk conditions  $\text{KO}^t\text{Bu}$  (1,1 eq) was added at  $0^\circ\text{C}$  to a solution of ethyl 2-(diethoxyphosphoryl)acetate (1 eq) in DMSO (1.0 M). This mixture was stirred at room temperature until the  $\text{KO}^t\text{Bu}$  was dissolved. Then 2-iodopropane (1,1 eq) was added. Next the solution was stirred for 1 hour at  $60^\circ\text{C}$ . Finally the mixture

was poured into a saturated ammonium chloride solution and extracted with ether. The combined organic layers were washed with brine, dried over magnesium sulfate and concentrated to yield the product as a yellow oil (95%).

$^1\text{H}$  NMR (300 MHz,  $\text{CDCl}_3$ )  $\delta$  4.32 – 4.02 (m, 6H), 2.69 (dd,  $J = 20.2, 9.4$  Hz, 1H), 2.36 (dq,  $J = 17.8, 8.1, 7.5$  Hz, 1H), 1.28 (dt,  $J = 10.2, 6.7$  Hz, 9H), 1.12 (d,  $J = 6.7$  Hz, 3H), 0.98 (d,  $J = 6.5$  Hz, 3H).  $^{31}\text{P}$  NMR (121 MHz,  $\text{CDCl}_3$ )  $\delta$  22.60.

### ethyl (E)-2-(2-(1,3-dioxolan-2-yl)benzylidene)-3-methylbutanoate

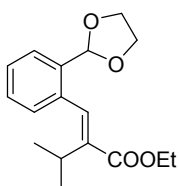

The reaction was performed according to general procedure C. The product was obtained as a mixture of E and Z isomers in a 2:1 ratio and as a colorless oil and used without further purification.

Z-isomer:  $^1\text{H}$  NMR (400 MHz,  $\text{CDCl}_3$ )  $\delta$  7.74 (s, 1H), 7.61 – 7.50 (m, 1H), 7.37 – 7.31 (m, 1H), 7.31 – 7.22 (m, 1H), 7.15 – 7.09 (m, 1H), 5.90 (s, 1H), 4.18 – 3.97 (m, 4H), 3.94 (q,  $J = 7.1$  Hz, 2H), 2.94 – 2.72 (m, 1H), 1.19 (d,  $J = 6.8$  Hz, 6H), 0.87 (t,  $J = 7.1$  Hz, 3H).

E-isomer:  $^1\text{H}$  NMR (400 MHz,  $\text{CDCl}_3$ )  $\delta$  7.61 – 7.50 (m, 1H), 7.37 – 7.31 (m, 1H), 7.31 – 7.22 (m, 1H), 7.15 – 7.09 (m, 1H), 6.90 (d,  $J = 1.3$  Hz, 1H), 5.81 (s, 1H), 4.26 (q,  $J = 7.1$  Hz, 2H), 4.18 – 3.97 (m, 4H), 2.94 – 2.72 (m, 1H), 1.35 (t,  $J = 7.1$  Hz, 3H), 1.16 (d,  $J = 7.0$  Hz, 6H).

#### ethyl (E)-2-(2-(1,3-dioxolan-2-yl)-4-methoxybenzylidene)butanoate

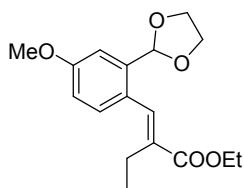

The reaction was performed according to general procedure C. The product was obtained as a light yellow oil and used without further purification.

$^1\text{H NMR}$  (300 MHz,  $\text{CDCl}_3$ )  $\delta$  7.83 (s, 1H), 7.15 (s, 1H), 6.90 (dd,  $J = 8.4, 2.7$  Hz, 2H), 5.83 (s, 1H), 4.27 (q,  $J = 7.1$  Hz, 2H), 4.18 – 3.96 (m, 4H), 3.84 (s, 3H), 2.37 (q,  $J = 7.4$  Hz, 2H), 1.34 (t,  $J = 7.1$  Hz, 3H), 1.07 (t,  $J = 7.4$  Hz, 3H).

#### ethyl (E)-2-(2-(1,3-dioxolan-2-yl)-4,5-dimethoxybenzylidene)butanoate

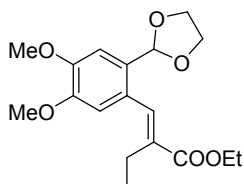

The reaction was performed according to general procedure C. The product was obtained as a yellow oil and used without further purification.

$^1\text{H NMR}$  (400 MHz,  $\text{CDCl}_3$ )  $\delta$  7.82 (s, 1H), 7.11 (s, 1H), 6.72 (s, 1H), 5.78 (s, 1H), 4.28 (q,  $J = 7.1$  Hz, 2H), 4.20 – 4.10 (m, 4H), 3.92 (s, 3H), 3.87 (s, 3H), 2.39 (q,  $J = 7.8$  Hz, 2H), 1.35 (t,  $J = 7.1$  Hz, 3H), 1.10 (t,  $J = 7.4$  Hz, 3H).

#### General Procedure D, aldehyde deprotection.

To a solution of ethyl (E)-3-(2-(1,3-dioxolan-2-yl)phenyl)-2-methylacrylate (1 eq) in acetone (0.15 M)  $\text{FeCl}_3$  (0.2 eq) was added. The reaction was stirred overnight. Then it was filtered over a plug of silica and eluted with EtOAc followed by removal of the solvent *in vacuo*. The residue was purified by column chromatography.

#### General Procedure E, Heck coupling.

The alkene was filtered over basic alumina before the reaction. Under Schlenk conditions bromobenzaldehyde (1 eq) was dissolved in toluene (0.5M). Then  $\text{Pd}(\text{OAc})_2$  (0.02 eq),  $\text{P}(o\text{-tol})_3$  (0.04 eq),  $\alpha$ -methylstyrene (1.5 eq) and triethylamine (2.5M) were added and the reaction was heated to reflux for 48h. The reaction was then cooled down to room temperature, diluted with water and extracted with DCM. The combined organic layers were dried over  $\text{MgSO}_4$ , concentrated *in vacuo* and purified by column chromatography.

#### ethyl (E)-3-(2-formylphenyl)-2-methylacrylate

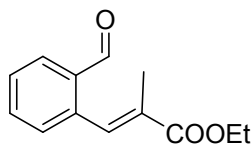

The reaction was performed according to general procedure D. The residue was purified by column chromatography (9:1 hexanes:EtOAc) and the product was obtained as yellow oil (62%).

$^1\text{H NMR}$  (400 MHz,  $\text{CDCl}_3$ )  $\delta$  10.17 (s, 1H), 8.06 (s, 1H), 7.94 (dd,  $J = 7.7, 1.4$  Hz, 1H), 7.62 (td,  $J = 7.6, 1.5$  Hz, 1H), 7.49 (t,  $J = 7.4$  Hz, 1H), 7.31 (d,  $J = 7.6$  Hz, 1H), 4.30 (q,  $J = 7.1$  Hz, 2H), 1.90 (d,  $J = 1.5$  Hz, 3H), 1.37 (t,  $J = 7.1$  Hz, 3H).

#### ethyl (E)-3-(4-fluoro-2-formylphenyl)-2-methylacrylate

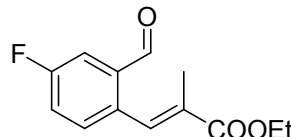

The reaction was performed according to general procedure D. The product was purified by column chromatography (9:1 hexanes:EtOAc) and obtained as yellow oil (42%).

$^1\text{H NMR}$  (400 MHz,  $\text{CDCl}_3$ )  $\delta$  10.12 (d,  $J = 2.5$  Hz, 1H), 7.98 (t,  $J = 1.6$  Hz, 1H), 7.66 – 7.59 (m, 1H), 7.35 – 7.29 (m, 2H), 4.30 (q,  $J = 7.1$  Hz, 2H), 1.89 (d,  $J = 1.6$  Hz, 3H), 1.36 (t,  $J = 7.1$  Hz, 3H).  $^{13}\text{C NMR}$  (75 MHz,  $\text{CDCl}_3$ )  $\delta$  190.09 (d,  $J = 1.9$  Hz), 167.43 (s), 162.40 (d,  $J = 250.8$  Hz), 135.42 (d,  $J = 6.2$  Hz), 134.94 (d,  $J = 3.3$  Hz), 134.50 (s), 132.83 (s), 131.94 (d,  $J = 7.2$  Hz), 121.03 (d,  $J = 22.0$  Hz), 115.43 (d,  $J = 22.4$  Hz), 61.24 (s), 14.29 (s), 14.05 (s).  $^{19}\text{F NMR}$  (282 MHz,  $\text{CDCl}_3$ )  $\delta$  -112.80 (s). IR (neat)  $\nu$  2982, 2931, 2854, 1695, 1488, 1250, 1112  $\text{cm}^{-1}$ . HRMS(EI $^+$ ) calcd. for  $\text{C}_{10}\text{H}_8\text{FO}$  [ $\text{M}-\text{COOEt}^+$ ] 163.05592, found 163.05557.



### ethyl (E)-3-(5-fluoro-2-formylphenyl)-2-methylacrylate

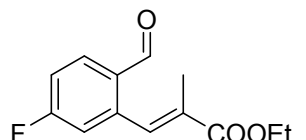

The reaction was performed according to general procedure D. The product was purified by column chromatography (9:1 → 4:1 hexanes:EtOAc) and obtained as a yellow oil (59%).

$^1\text{H NMR}$  (300 MHz,  $\text{CDCl}_3$ )  $\delta$  10.09 (s, 1H), 7.99 (s, 1H), 7.96 (dd,  $J = 5.9, 2.8$  Hz, 1H), 7.17 (td,  $J = 8.3, 2.5$  Hz, 1H), 7.00 (dd,  $J = 9.2, 2.5$  Hz, 1H), 4.30 (q,  $J = 7.1$  Hz, 2H), 1.91 (d,  $J = 1.6$  Hz, 3H), 1.36 (t,  $J = 7.1$  Hz, 3H).  $^{13}\text{C NMR}$  (75 MHz,  $\text{CDCl}_3$ )  $\delta$  189.97 (d,  $J = 7.2$  Hz), 167.44 (s), 165.71 (d,  $J = 257.5$  Hz), 141.86 (d,  $J = 9.2$  Hz), 134.60 (s), 133.14 (s), 132.75 (d,  $J = 9.9$  Hz), 130.51 (d,  $J = 2.5$  Hz), 117.02 (d,  $J = 22.6$  Hz), 115.92 (d,  $J = 22.0$  Hz), 61.42 (s), 14.40 (s), 14.18 (s).  $^{19}\text{F NMR}$  (282 MHz,  $\text{CDCl}_3$ )  $\delta$  -102.85. IR (neat)  $\nu$  2983, 2932, 2852, 1698, 1575, 1257, 1233, 1114  $\text{cm}^{-1}$ . HRMS(EI<sup>+</sup>) calcd. for  $\text{C}_{11}\text{H}_8\text{FO}_3$  [M-Et]<sup>+</sup> 207.0457, found 207.0466.

### ethyl (E)-3-(2-formyl-4-(trifluoromethyl)phenyl)-2-methylacrylate

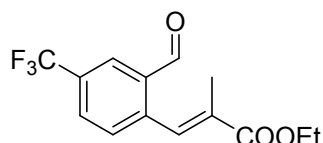

The reaction was performed according to general procedure D. The residue was purified by column chromatography (9:1 hexanes:EtOAc) and the product was obtained as a 7:1 mixture of E:Z isomers as a yellow oil (32%).

$^1\text{H NMR}$  (300 MHz,  $\text{CDCl}_3$ )  $\delta$  10.18 (s, 1H), 8.18 (br s, 1H), 8.01 (s, 1H), 7.84 (dd,  $J = 8.1, 1.9$  Hz, 1H), 7.45 (d,  $J = 8.0$  Hz, 1H), 4.29 (q,  $J = 7.1$  Hz, 2H), 1.88 (d,  $J = 1.5$  Hz, 3H), 1.35 (t,  $J = 7.0$  Hz, 3H).  $^{13}\text{C NMR}$  (101 MHz,  $\text{CDCl}_3$ )  $\delta$  190.15, 167.29, 142.29, 134.32, 134.10, 133.88, 131.08 (d,  $J = 33.7$  Hz), 130.85, 130.13 (q,  $J = 3.4$  Hz), 126.63 (q,  $J = 3.6$  Hz), 123.53 (d,  $J = 272.4$  Hz), 61.54, 14.41, 14.26.  $^{19}\text{F NMR}$  (282 MHz,  $\text{CDCl}_3$ )  $\delta$  -63.00. IR (neat)  $\nu$  2985, 2854, 1702, 1330, 1253, 1169, 1127  $\text{cm}^{-1}$ . HRMS(FD<sup>+</sup>) calcd. for  $\text{C}_{14}\text{H}_{13}\text{F}_3\text{O}_3$  [M]<sup>+</sup> 286.0817 found 286.0823.

### ethyl (E)-3-(2-formyl-5-methylphenyl)-2-methylacrylate

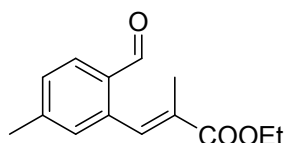

The reaction was performed according to general procedure D. The product was purified by column chromatography (9:1 hexanes:EtOAc) and obtained as an orange oil (56%).

$^1\text{H NMR}$  (500 MHz,  $\text{CDCl}_3$ )  $\delta$  10.10 (s, 1H), 8.03 (s, 1H), 7.83 (d,  $J = 7.9$  Hz, 1H), 7.29 (d,  $J = 8.0$  Hz, 1H), 7.10 (s, 1H), 4.30 (q,  $J = 7.1$  Hz, 2H), 2.44 (s, 3H), 1.90 (d,  $J = 1.6$  Hz, 3H), 1.36 (t,  $J = 7.1$  Hz, 3H).  $^{13}\text{C NMR}$  (126 MHz,  $\text{CDCl}_3$ )  $\delta$  191.41, 167.87, 144.90, 139.02, 136.34, 131.90, 131.65, 130.54, 130.21, 129.37, 61.22, 22.00, 14.45, 14.22. IR (neat)  $\nu$  2982, 2850, 2746, 1695, 1602, 1257, 1229, 1112, 821  $\text{cm}^{-1}$ . HRMS(EI<sup>+</sup>) calcd. for  $\text{C}_{12}\text{H}_{11}\text{O}_3$  [M-Et]<sup>+</sup> 203.0708, found 203.0751.

### ethyl (E)-3-(2-formyl-4-methoxyphenyl)-2-methylacrylate

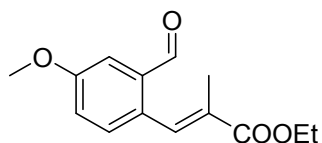

The reaction was performed according to general procedure D. The product was purified by column chromatography (4:1 hexanes:EtOAc) and obtained as an orange oil (74%, 80% based on recovery of starting material).

$^1\text{H NMR}$  (400 MHz,  $\text{CDCl}_3$ )  $\delta$  10.17 (s, 1H), 8.17 – 7.93 (m, 1H), 7.45 (d,  $J = 2.7$  Hz, 1H), 7.27 (d,  $J = 8.5$  Hz, 1H), 7.18 (dd,  $J = 8.5, 2.8$  Hz, 1H), 4.31 (q,  $J = 7.2$  Hz, 2H), 3.90 (s, 3H, OMe), 1.93 (d,  $J = 1.5$  Hz, 3H, allyl), 1.38 (t,  $J = 7.2$  Hz, 3H).  $^{13}\text{C NMR}$  (75 MHz,  $\text{CDCl}_3$ )  $\delta$  191.22, 167.79, 159.62, 135.33, 134.83, 131.66, 131.57, 131.37, 120.87, 112.26, 61.07, 55.61, 14.32, 14.09.

#### ethyl (E)-3-(2-formyl-4,5-dimethoxyphenyl)-2-methylacrylate

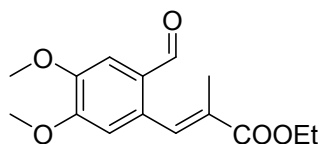

The reaction was performed according to general procedure D. The product was purified by column chromatography (4:1 hexanes:EtOAc) and obtained as a white solid (22%).

$^1\text{H NMR}$  (300 MHz,  $\text{CDCl}_3$ )  $\delta$  10.02 (s, 1H), 8.08 – 7.94 (m, 1H), 7.45 (s, 1H), 6.72 (s, 1H), 4.30 (q,  $J = 7.1$  Hz, 2H), 3.96 (s, 3H, OMe), 3.95 (s, 3H, OMe), 1.91 (d,  $J = 1.5$  Hz, 3H, allyl), 1.36 (t,  $J = 7.1$  Hz, 3H).  $^{13}\text{C NMR}$  (101 MHz,  $\text{CDCl}_3$ )  $\delta$  189.91, 167.70, 153.69, 149.22, 135.32, 134.42, 132.67, 127.25, 111.54, 109.61, 61.29, 56.37, 56.24, 14.37, 13.92. IR (neat)  $\nu$  2978, 2938, 2850, 1680, 1510, 1275, 1250, 1217, 1108  $\text{cm}^{-1}$ . HRMS( $\text{EI}^+$ ) calcd. for  $\text{C}_{15}\text{H}_{18}\text{O}_5$  [ $\text{M}$ ] $^+$  278.1154, found 278.1146.

#### (E)-2-(2-methyl-3-oxobut-1-en-1-yl)benzaldehyde

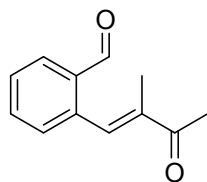

The reaction was performed according to general procedure E. The product was purified by column chromatography (3:1 hexanes:EtOAc) and obtained as a red brown oil (27%).

$^1\text{H NMR}$  (300 MHz,  $\text{CDCl}_3$ )  $\delta$  10.15 (s, 1H), 8.00 (br s, 1H), 7.92 (dd,  $J = 7.6, 1.5$  Hz, 1H), 7.65 (td,  $J = 7.5, 1.5$  Hz, 1H), 7.54 (td,  $J = 7.6, 1.3$  Hz, 1H), 7.36 (d,  $J = 7.6$  Hz, 1H), 2.52 (s, 3H, C(O)Me), 1.85 (d,  $J = 1.4$  Hz, 3H allyl Me).  $^{13}\text{C NMR}$  (126 MHz,  $\text{CDCl}_3$ )  $\delta$  200.22, 192.30, 139.69, 138.04, 137.79, 133.77, 133.75, 132.41, 130.29, 128.80, 26.13, 13.06. IR (neat)  $\nu$  2924, 2849, 2745, 1696, 1668, 1246, 754  $\text{cm}^{-1}$ . HRMS( $\text{EI}^+$ ) calcd. for  $\text{C}_{12}\text{H}_{12}\text{O}_2$  [ $\text{M}$ ] $^+$  188.0837, found 188.0823.

#### (E)-2-(2-(4-methylcyclohex-3-en-1-yl)prop-1-en-1-yl)benzaldehyde

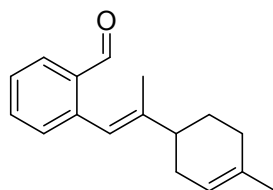

The reaction was performed according to general procedure E. The product was purified by column chromatography (40:1 hexanes:EtOAc) and obtained as a 2:1 mixture of the E and Z isomers as a yellow liquid (47%).

$^1\text{H NMR}$  (400 MHz,  $\text{CDCl}_3$ )  $\delta$  10.29 (s, 1H, CHO, Z), 10.21 (s, 1H, CHO, E), 7.93 – 7.84 (m, 1H+1H, E+Z), 7.58 – 7.48 (m, 1H+1H, E+Z), 7.43 – 7.31 (m, 1H+1H, E+Z), 7.30 – 7.19 (m, 1H+1H, E+Z), 6.60 (s, 1H, allyl CH, E), 6.53 (s, 1H, allyl CH, Z), 5.48 – 5.43 (m, 1H, CH alkene cyclohexyl, E), 5.43 – 5.38 (m, 1H, CH alkene cyclohexyl, Z), 1.88 (d,  $J = 1.5$  Hz, 1H, allyl Me, Z), 1.71 – 1.67 (s, 3H, Me cyclohexyl, E), 1.65 (s, 3H, Me cyclohexyl, Z), 1.63 (d,  $J = 1.3$  Hz, 3H, allyl Me, E), 2.26 – 0.95 (m, 7H+7H, cyclohexyl, E+Z).  $^{13}\text{C NMR}$  (75 MHz,  $\text{CDCl}_3$ )  $\delta$  192.86, 192.22, 154.19, 147.27, 142.74, 142.45, 134.06, 133.96, 133.71, 132.04, 131.63, 130.89, 130.74, 130.45, 129.16, 127.94, 127.08, 127.03, 126.94, 120.58, 120.52, 119.65, 43.07, 40.37, 37.58, 31.48, 31.00, 30.74, 30.63, 28.37, 28.01, 23.65, 23.59, 16.17. IR (neat)  $\nu$  2961, 2919, 2834, 1693, 1643, 1596, 1449, 1208, 1192, 815, 795, 754  $\text{cm}^{-1}$ . HRMS( $\text{FD}^+$ ) calcd. for  $\text{C}_{17}\text{H}_{20}\text{O}$  [ $\text{M}$ ] $^+$  240.15141, found 240.15088.

#### (E)-2-(2-phenylprop-1-en-1-yl)benzaldehyde

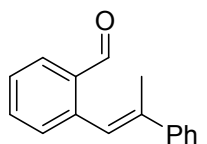

The reaction was performed according to general procedure E. The product was purified by column chromatography (40:1 hexanes:EtOAc) and obtained as a 3:1 mixture of the E and Z isomers as an orange liquid (40%).

$^1\text{H NMR}$  (300 MHz,  $\text{CDCl}_3$ )  $\delta$  10.28 (s, 1H, CHO, E), 10.24 (s, 1H, CHO, Z), 7.98-6.90 (m, 10H+10H, E+Z), 2.32 (d,  $J = 1.5$  Hz, 3H, Me, Z), 2.09 (d,  $J = 1.3$  Hz, 3H, Me, E).  $^{13}\text{C NMR}$  (101 MHz,  $\text{CDCl}_3$ )  $\delta$  192.58, 142.61, 141.83, 140.64, 134.14, 133.78, 130.80, 129.04, 128.62, 127.94, 127.46, 126.10, 123.90, 17.48. IR (neat)  $\nu$  3058, 2917, 2850, 2742, 1692, 1595, 755, 696  $\text{cm}^{-1}$ . HRMS( $\text{EI}^+$ ) calcd. for  $\text{C}_{16}\text{H}_{14}\text{O}$  [ $\text{M}$ ] $^+$  222.10446, found 222.10323.

### 2-(2-methylprop-1-en-1-yl)benzaldehyde

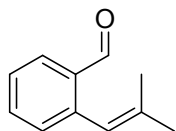

The reaction was performed according to general procedure E. The product was purified by column chromatography (20:1 hexanes:EtOAc) and obtained as a yellow liquid (63%).

$^1\text{H NMR}$  (400 MHz,  $\text{CDCl}_3$ )  $\delta$  10.22 (s, 1H), 7.89 (dd,  $J = 7.8, 1.2$  Hz, 1H), 7.54 (td,  $J = 7.5, 1.4$  Hz, 1H), 7.36 (t,  $J = 7.6$  Hz, 1H), 7.23 (d,  $J = 7.7$  Hz, 1H), 6.58 (br s, 1H), 1.96 (d,  $J = 1.3$  Hz, 3H), 1.66 (d,  $J = 1.1$  Hz, 3H).

### 2-(cyclohexylidenemethyl)benzaldehyde

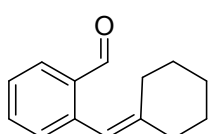

The reaction was performed according to general procedure D. The product was purified by column chromatography (hexanes) and obtained as yellow oil (59%).

$^1\text{H NMR}$  (300 MHz,  $\text{CDCl}_3$ )  $\delta$  10.28 (d,  $J = 0.8$  Hz, 1H), 7.91 (dd,  $J = 7.7, 1.5$  Hz, 1H), 7.56 (td,  $J = 7.5, 1.5$  Hz, 1H), 7.38 (dddd,  $J = 7.9, 7.2, 1.3, 0.7$  Hz, 1H), 7.24 (ddt,  $J = 7.7, 1.3, 0.6$  Hz, 1H), 6.53 (s, 1H), 2.41 – 2.30 (m, 2H), 2.12 (td,  $J = 5.9, 1.1$  Hz, 2H), 1.79 – 1.46 (m, 6H).  $^{13}\text{C NMR}$  (75 MHz,  $\text{CDCl}_3$ )  $\delta$  192.84, 147.10, 141.97, 133.92, 133.58, 130.91, 127.72, 126.79, 117.75, 37.25, 29.82, 28.57, 27.66, 26.48.

### ethyl (E)-2-(2-formylbenzylidene)butanoate

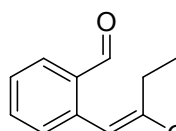

The reaction was performed according to general procedure D. The product was purified by column chromatography (9:1 hexanes:EtOAc) and obtained as a yellow oil (58%).

$^1\text{H NMR}$  (300 MHz,  $\text{CDCl}_3$ )  $\delta$  10.19 (s, 1H), 8.00 (s, 1H), 7.93 (dd,  $J = 7.7, 1.5$  Hz, 1H), 7.62 (td,  $J = 7.5, 1.4$  Hz, 1H), 7.55 – 7.42 (m, 1H), 7.29 (ddd,  $J = 7.7, 1.4, 0.7$  Hz, 1H), 4.31 (q,  $J = 7.1$  Hz, 2H), 2.31 (qd,  $J = 7.4, 0.6$  Hz, 2H), 1.37 (t,  $J = 7.1$  Hz, 3H), 1.03 (t,  $J = 7.4$  Hz, 3H).  $^{13}\text{C NMR}$  (75 MHz,  $\text{CDCl}_3$ )  $\delta$  191.72, 167.43, 139.07, 138.15, 135.75, 133.92, 133.78, 129.93, 129.69, 128.53, 61.10, 21.21, 14.43, 13.89.

### ethyl (E)-2-(2-formylbenzylidene)pentanoate

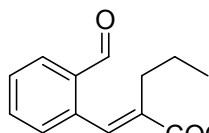

The reaction was performed according to general procedure D. The product was purified by column chromatography (9:1 hexanes:EtOAc) and obtained as a yellow oil (43%).

$^1\text{H NMR}$  (300 MHz,  $\text{CDCl}_3$ )  $\delta$  10.19 (s, 1H), 8.01 (s, 1H), 7.93 (dd,  $J = 7.7, 1.4$  Hz, 1H), 7.61 (td,  $J = 7.5, 1.5$  Hz, 1H), 7.50 (d,  $J = 7.5$  Hz, 1H), 7.28 (d,  $J = 7.5$  Hz, 1H), 4.30 (q,  $J = 7.1$  Hz, 2H), 2.39 – 2.17 (m, 2H), 1.49 – 1.39 (m, 2H), 1.36 (t,  $J = 7.1$  Hz, 3H), 0.79 (t,  $J = 7.3$  Hz, 3H).  $^{13}\text{C NMR}$  (75 MHz,  $\text{CDCl}_3$ )  $\delta$  191.61, 167.49, 139.08, 136.76, 136.05, 133.78, 133.64, 129.71, 129.61, 128.36, 60.98, 29.66, 22.39, 14.29, 14.02. IR (neat)  $\nu$  2962, 1699, 1225, 1094, 756  $\text{cm}^{-1}$ . HRMS( $\text{EI}^+$ ) calcd. for  $\text{C}_{15}\text{H}_{18}\text{O}_3$  [ $\text{M}$ ] $^+$  246.1256, found 246.1257.

### ethyl (E)-2-(2-formylbenzylidene)-3-methylbutanoate

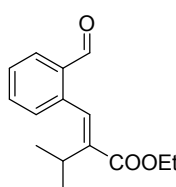

The reaction was performed according to general procedure D. The product was purified by column chromatography (9:1 hexanes:EtOAc) and obtained as a yellow oil (27%).

E-isomer:  $^1\text{H NMR}$  (300 MHz,  $\text{CDCl}_3$ )  $\delta$  10.19 (s, 1H), 7.89 – 7.82 (m, 1H), 7.50 (td,  $J = 7.5, 1.5$  Hz, 1H), 7.44 – 7.33 (m, 1H), 7.30 – 7.17 (m, 1H), 7.06 (s, 1H), 3.92 (q,  $J = 7.1$  Hz, 2H), 2.89 (pd,  $J = 6.8, 1.4$  Hz, 1H), 1.22 (d,  $J = 6.9$  Hz, 6H), 0.87 (t,  $J = 7.1$  Hz, 3H).

Z-isomer:  $^1\text{H NMR}$  (300 MHz,  $\text{CDCl}_3$ )  $\delta$  10.20 (s, 1H), 7.93 (dd,  $J = 7.7, 1.5$  Hz, 1H), 7.86 (s, 1H), 7.60 (td,  $J = 7.5, 1.5$  Hz, 1H), 7.50 (td,  $J = 7.5, 1.5$  Hz, 1H), 7.30 – 7.17 (m, 1H), 4.28 (q,  $J = 7.1$  Hz, 2H), 2.73 (p,  $J = 6.9$  Hz, 1H), 1.36 (t,  $J = 7.1$  Hz, 3H), 1.15 (d,  $J = 7.0$  Hz, 6H).  $^{13}\text{C NMR}$  (101 MHz,  $\text{CDCl}_3$ )  $\delta$  192.06, 168.92, 144.77, 140.70, 135.19, 133.95, 133.51, 129.62, 128.15, 127.85, 60.56, 32.44, 21.66, 13.72. IR (neat)  $\nu$  2966, 1699, 1233, 1056, 756  $\text{cm}^{-1}$ . HRMS( $\text{FD}^+$ ) calcd. for  $\text{C}_{15}\text{H}_{18}\text{O}_3$  [ $\text{M}$ ] $^+$  246.1256, found 246.1270.

### ethyl (E)-2-(2-formyl-4-methoxybenzylidene)butanoate

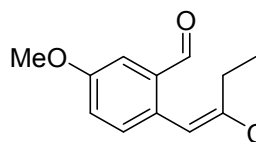

The reaction was performed according to general procedure D. The product was purified by column chromatography (5:1 pet ether 40-60:EtOAc) and obtained as a light yellow oil (57%).

$^1\text{H NMR}$  (300 MHz,  $\text{CDCl}_3$ )  $\delta$  10.19 (s, 1H), 7.98 (s, 1H), 7.44 (d,  $J = 2.6$  Hz, 1H), 7.23 (s, 1H), 7.19 (d,  $J = 2.6$  Hz, 1H), 4.32 (q,  $J = 7.1$  Hz, 2H), 3.90 (s, 3H), 2.35 (q,  $J = 7.4$  Hz, 2H), 1.38 (t,  $J = 7.1$  Hz, 3H), 1.06 (t,  $J = 7.4$  Hz, 3H).  $^{13}\text{C NMR}$  (75 MHz,  $\text{CDCl}_3$ )  $\delta$  191.34, 167.53, 159.72, 138.01, 135.07, 134.82, 131.84, 131.04, 121.11, 112.31, 61.03, 55.71, 21.17, 14.42, 13.87. IR (neat)  $\nu$  2975, 2938, 1694, 1602, 1493, 1229, 1125, 708, 565  $\text{cm}^{-1}$ . HRMS(EI<sup>+</sup>) calcd. for  $\text{C}_{15}\text{H}_{18}\text{O}_4$  [M]<sup>+</sup> 262.12051, found 262.12059.

### ethyl (E)-2-(2-formyl-4,5-dimethoxybenzylidene)butanoate

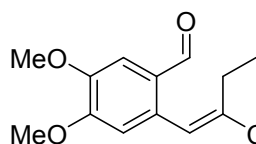

The reaction was performed according to general procedure D. The product was purified by column chromatography (5:1 pet ether 40-60:EtOAc) and obtained as a white solid (50%).

$^1\text{H NMR}$  (300 MHz,  $\text{CDCl}_3$ )  $\delta$  10.06 (s, 1H), 7.95 (s, 1H), 7.44 (s, 1H), 6.72 (s, 1H), 4.31 (q,  $J = 7.1$  Hz, 2H), 3.95 (s, 3H+3H), 2.34 (q,  $J = 7.2$  Hz, 2H), 1.37 (t,  $J = 7.1$  Hz, 3H), 1.06 (t,  $J = 7.4$  Hz, 3H).  $^{13}\text{C NMR}$  (75 MHz,  $\text{CDCl}_3$ )  $\delta$  189.92, 167.34, 153.74, 149.17, 138.73, 134.94, 134.52, 127.14, 111.34, 109.60, 61.15, 56.35, 56.25, 21.42, 14.44, 13.88. IR (neat)  $\nu$  2974, 2937, 1707, 1682, 1593, 1510, 1278, 1236, 1219, 1071, 1021, 747, 582  $\text{cm}^{-1}$ . HRMS(FD<sup>+</sup>) calcd. for  $\text{C}_{16}\text{H}_{20}\text{O}_5$  [M]<sup>+</sup> 292.1311, found 292.1316.

### General Procedure F, tosylhydrazone introduction.

To benzaldehyde (1 eq) in dry MeOH (1M) *p*-toluenesulfonyl hydrazide (1.11 eq) was added under rapid stirring. If the substrate doesn't dissolve within 15 min. the reaction was heated to 60°C for 1h, during which the substrate should dissolve quickly followed by precipitation of the product. Next the reaction was concentrated and triturated with Et<sub>2</sub>O. The product was obtained by concentration of the ether solution.

### ethyl (E)-2-methyl-3-(2-((E)-(2-tosylhydrazineylidene)methyl)phenyl)acrylate (1a)

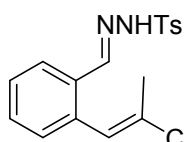

The reaction was performed according to general procedure F. The product was isolated as an off white solid (81%).

$^1\text{H NMR}$  (400 MHz,  $\text{DMSO}-d_6$ )  $\delta$  11.43 (s, 1H), 7.94 (s, 1H), 7.78 – 7.65 (m, 4H), 7.46 – 7.34 (m, 4H), 7.26 (dd,  $J = 6.9, 1.4$  Hz, 1H), 4.22 (q,  $J = 7.1$  Hz, 2H,  $\text{COOCH}_2\text{CH}_3$ ), 2.35 (s, 3H, Ts Me), 1.69 (d,  $J = 1.5$  Hz, 3H), 1.29 (t,  $J = 7.1$  Hz, 3H,  $\text{COOCH}_2\text{CH}_3$ ).  $^{13}\text{C NMR}$  (126 MHz,  $\text{DMSO}$ )  $\delta$  166.97, 145.12, 143.40, 136.46, 136.02, 134.76, 131.32, 130.32, 129.55, 129.52, 129.39, 128.39, 127.11, 126.05, 60.55, 20.92, 14.08, 13.69. IR (neat)  $\nu$  3180, 2982, 2926, 1704, 1165  $\text{cm}^{-1}$ . HRMS(FD<sup>+</sup>) calcd. for  $\text{C}_{20}\text{H}_{22}\text{N}_2\text{O}_4\text{S}$  [M]<sup>+</sup> 386.13003, found 386.12849.

### ethyl (E)-3-(4-fluoro-2-((E)-(2-tosylhydrazono)methyl)phenyl)-2-methylacrylate (1b)

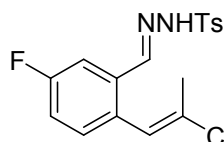

The reaction was performed according to general procedure F. The product was isolated by trituration and obtained as a white powder (73%).

$^1\text{H NMR}$  (300 MHz,  $\text{DMSO}-d_6$ )  $\delta$  11.60 (s, 1H), 7.90 (d,  $J = 1.6$  Hz, 1H), 7.74 (d,  $J = 8.1$  Hz, 2H), 7.67 (s, 1H), 7.48 – 7.37 (m, 3H), 7.39 – 7.25 (m, 2H), 4.21 (q,  $J = 7.1$  Hz, 2H,  $\text{COOCH}_2\text{CH}_3$ ), 2.36 (s, 3H, Ts Me), 1.68 (d,  $J = 1.4$  Hz, 3H,  $\text{CH}_3$ -allyl), 1.28 (t,  $J = 7.1$  Hz, 3H,  $\text{COOCH}_2\text{CH}_3$ ).  $^{13}\text{C NMR}$  (75 MHz,  $\text{DMSO}-d_6$ )  $\delta$  166.97 (s, C=O), 161.70 (d,  $J = 249.4$  Hz, CF), 143.85 (s), 143.66 (s), 135.91 (s), 135.54 (s), 133.79 (d,  $J = 7.8$  Hz), 132.04 (d,  $J = 8.5$  Hz), 131.24 (d,  $J = 3.2$  Hz), 130.81 (s), 129.72 (s), 127.22 (s), 116.85 (d,  $J = 20.3$  Hz), 111.83 (d,  $J = 22.8$  Hz), 60.73 (s,  $\text{COOCH}_2\text{CH}_3$ ), 21.04 (s, Ts Me), 14.18 (s,  $\text{COOCH}_2\text{CH}_3$ ), 13.80 (s, allyl-Me).  $^{19}\text{F NMR}$  (282 MHz,  $\text{DMSO}-d_6$ )  $\delta$  -112.74. IR

(neat)  $\nu$  3165, 2986, 2921, 1674, 1443, 1271, 1184, 1125, 1090  $\text{cm}^{-1}$ . HRMS(FD<sup>+</sup>) calcd. for  $\text{C}_{20}\text{H}_{21}\text{FN}_2\text{O}_4\text{S}$  [M]<sup>+</sup> 404.1206, found 404.1210.

**ethyl (E)-3-(5-fluoro-2-((E)-(2-tosylhydrazineylidene)methyl)phenyl)-2-methylacrylate (1c)**

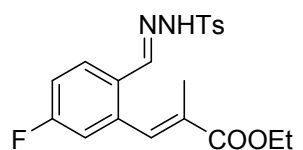

The reaction was performed according to general procedure F. The product was isolated as a white solid (78%).

<sup>1</sup>H NMR (300 MHz, DMSO-*d*<sub>6</sub>)  $\delta$  11.45 (s, 1H), 7.89 (s, 1H, alkene), 7.81 – 7.58 (m, 4H), 7.38 (d, *J* = 8.3 Hz, 2H, Ar Ts), 7.24 (td, *J* = 8.6, 2.7 Hz, 1H), 7.13 (dd, *J* = 9.8, 2.7 Hz, 1H), 4.22 (q, *J* = 7.1 Hz, 2H, COOCH<sub>2</sub>CH<sub>3</sub>), 2.35 (s, 3H, Ts Me), 1.69 (d, *J* = 1.5 Hz, 3H, CH<sub>3</sub>-allyl), 1.29 (t, *J* = 7.1 Hz, 3H, COOCH<sub>2</sub>CH<sub>3</sub>). <sup>13</sup>C NMR (101 MHz, DMSO-*d*<sub>6</sub>)  $\delta$  166.80, 162.33 (d, *J* = 248.7 Hz), 144.23, 143.49, 137.19 (d, *J* = 8.5 Hz), 136.00, 135.25, 131.34, 129.61, 128.51 (d, *J* = 9.1 Hz), 128.03 (d, *J* = 3.1 Hz), 127.16, 116.03 (d, *J* = 22.4 Hz), 115.78 (d, *J* = 22.1 Hz), 60.75, 20.99, 14.13, 13.75. <sup>19</sup>F NMR (282 MHz, DMSO-*d*<sub>6</sub>)  $\delta$  -110.81. IR (neat)  $\nu$  3204, 2982, 2927, 1706, 1597, 1240, 1162, 1118, 1088  $\text{cm}^{-1}$ . HRMS(FD<sup>+</sup>) calcd. for  $\text{C}_{20}\text{H}_{21}\text{FN}_2\text{O}_4\text{S}$  [M]<sup>+</sup> 404.1206, found 404.1216.

**ethyl (E)-2-methyl-3-(2-((E)-(2-tosylhydrazineylidene)methyl)-4-(trifluoromethyl)phenyl)acrylate (1d)**

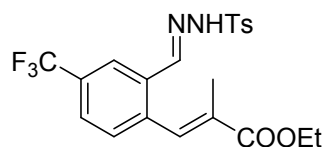

The reaction was performed according to general procedure F. The product was isolated by trituration and obtained as a 7:1 mixture of E:Z isomers a yellow solid (97%).

<sup>1</sup>H NMR (300 MHz, DMSO-*d*<sub>6</sub>)  $\delta$  11.68 (s, 1H), 7.98 (s, 1H), 7.93 (d, *J* = 1.9 Hz, 1H), 7.75 (ddd, *J* = 11.0, 7.0, 2.1 Hz, 4H), 7.49 (d, *J* = 8.1 Hz, 1H), 7.39 (d, *J* = 8.0 Hz, 2H), 4.23 (q, *J* = 7.1 Hz, 2H), 2.35 (s, 3H), 1.68 (d, *J* = 1.6 Hz, 3H), 1.29 (t, *J* = 7.1 Hz, 3H). <sup>13</sup>C NMR (75 MHz, DMSO-*d*<sub>6</sub>)  $\delta$  166.75, 143.70, 138.75, 135.91, 135.28, 132.41, 131.77, 130.86, 130.04, 129.68, 128.80 (q, *J* = 32.2 Hz), 127.15, 125.82 (q, *J* = 4.0 Hz), 123.78 (q, *J* = 272.3 Hz), 122.37 (q, *J* = 3.6 Hz), 60.85, 30.67, 14.14, 13.80. <sup>19</sup>F NMR (282 MHz, DMSO)  $\delta$  -61.49. IR (neat)  $\nu$  3186, 2984, 1710, 1327, 1270, 1256, 1165, 1126, 1078, 813, 667  $\text{cm}^{-1}$ . HRMS(FD<sup>+</sup>) calcd. for  $\text{C}_{21}\text{H}_{21}\text{F}_3\text{N}_2\text{O}_4\text{S}$  [M]<sup>+</sup> 454.1174, found 454.1168.

**ethyl (E)-2-methyl-3-(5-methyl-2-((E)-(2-tosylhydrazineylidene)methyl)phenyl)acrylate (1e)**

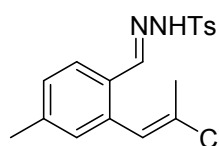

The reaction was performed according to general procedure F. The product was isolated as an off white solid (91%).

<sup>1</sup>H NMR (300 MHz, DMSO-*d*<sub>6</sub>)  $\delta$  11.35 (s, 1H), 7.89 (s, 1H), 7.72 (dd, *J* = 8.5, 1.9 Hz, 3H), 7.59 (d, *J* = 8.1 Hz, 1H), 7.38 (d, *J* = 8.2 Hz, 2H), 7.20 (d, *J* = 8.1 Hz, 1H), 7.06 (s, 1H), 4.21 (qd, *J* = 7.1, 1.8 Hz, 2H, COOCH<sub>2</sub>CH<sub>3</sub>), 2.35 (s, 3H, Ts Me), 2.31 (s, 3H, Ar Me), 1.68 (d, *J* = 1.6 Hz, 3H, CH<sub>3</sub>-allyl), 1.29 (t, *J* = 7.1 Hz, 3H, COOCH<sub>2</sub>CH<sub>3</sub>). <sup>13</sup>C NMR (75 MHz, DMSO-*d*<sub>6</sub>)  $\delta$  167.11, 145.42, 143.50, 139.60, 136.70, 136.05, 134.82, 130.26, 129.79, 129.63, 129.29, 128.70, 127.22, 126.20, 60.68, 21.04, 20.91, 14.20, 13.85. IR (neat)  $\nu$  3189, 2923, 2853, 1704, 1165, 813  $\text{cm}^{-1}$ . HRMS(FD<sup>+</sup>) calcd. for  $\text{C}_{21}\text{H}_{24}\text{N}_2\text{O}_4\text{S}$  [M]<sup>+</sup> 400.14568, found 400.14412.

**ethyl (E)-3-(4-methoxy-2-((E)-(2-tosylhydrazineylidene)methyl)phenyl)-2-methylacrylate (1f)**

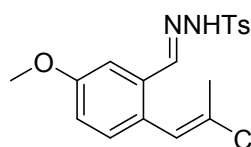

The reaction was performed according to general procedure F. The product was isolated as a white solid (quantitative yield).

<sup>1</sup>H NMR (400 MHz, DMSO-*d*<sub>6</sub>)  $\delta$  11.45 (s, 1H), 7.92 (s, 1H), 7.80 – 7.71 (m, 2H), 7.69 (d, *J* = 1.7 Hz, 1H), 7.39 (d, *J* = 8.1 Hz, 2H), 7.22 (d, *J* = 8.6 Hz, 1H), 7.17 (d, *J* = 2.7 Hz, 1H), 7.02 (dd, *J* = 8.6, 2.7 Hz, 1H), 4.21 (q, *J* = 7.1 Hz, 2H, COOCH<sub>2</sub>CH<sub>3</sub>), 3.79 (s, 3H, Ar OMe), 2.36 (s, 3H, Ts Me), 1.72 (d, *J* = 1.5 Hz, 3H, CH<sub>3</sub>-allyl), 1.28 (t, *J* = 7.1 Hz, 3H, COOCH<sub>2</sub>CH<sub>3</sub>). <sup>13</sup>C NMR (75 MHz, DMSO)  $\delta$  167.22, 159.03, 144.98, 143.58, 136.23, 135.93, 132.88, 131.22, 131.20, 129.63, 129.35, 127.24, 115.85, 110.43, 60.56, 55.30, 21.02, 14.19, 13.85. IR (neat)  $\nu$  3188, 2925, 1705, 1251, 1167, 813  $\text{cm}^{-1}$ . HRMS(FD<sup>+</sup>) calcd. for  $\text{C}_{21}\text{H}_{24}\text{N}_2\text{O}_5\text{S}$  [M]<sup>+</sup> 416.14059, found 416.13968.

#### ethyl (E)-3-(4,5-dimethoxy-2-((E)-(2-tosylhydrazineylidene)methyl)phenyl)-2-methylacrylate (1g)

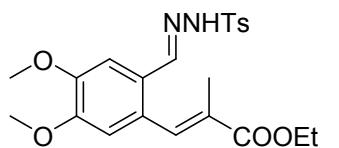

The reaction was performed according to general procedure F. The product was isolated as a yellow solid (79%).

$^1\text{H}$  NMR (300 MHz, DMSO- $d_6$ )  $\delta$  11.23 (s, 1H), 7.85 (s, 1H), 7.74 (d,  $J$  = 8.3 Hz, 2H), 7.67 (d,  $J$  = 1.7 Hz, 1H), 7.39 (d,  $J$  = 8.1 Hz, 2H), 7.19 (s, 1H), 6.81 (s, 1H), 4.21 (q,  $J$  = 7.1 Hz, 2H), 3.79 (s, 3H, OMe), 3.77 (s, 3H, OMe), 2.35 (s, 3H, Ts Me), 1.71 (d,  $J$  = 1.4 Hz, 3H, allyl), 1.28 (t,  $J$  = 7.1 Hz, 3H).  $^{13}\text{C}$  NMR (75 MHz, DMSO)  $\delta$  167.69, 167.18, 149.74, 148.20, 145.52, 143.47, 135.98, 131.18, 129.61, 128.34, 127.32, 124.20, 111.60, 107.81, 60.01, 55.74, 55.50, 21.05, 14.24, 13.60. IR (neat)  $\nu$  3185, 2927, 1703, 1508, 1247, 1163, 1109, 1033, 547  $\text{cm}^{-1}$ . HRMS(FD $^+$ ) calcd. for  $\text{C}_{22}\text{H}_{26}\text{N}_2\text{O}_6\text{S}$  [M] $^+$  446.1512, found 446.1492.

#### 4-methyl-N'-((E)-2-((E)-2-methyl-3-oxobut-1-en-1-yl)benzylidene)benzenesulfonohydrazide (1h)

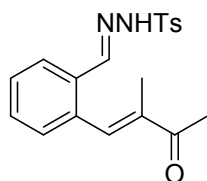

The reaction was performed according to general procedure F and purified by column chromatography (2:1 hexanes:EtOAc). The product was isolated as a green powder (61%).

$^1\text{H}$  NMR (300 MHz, DMSO- $d_6$ )  $\delta$  11.46 (s, 1H), 8.00 (s, 1H), 7.81 (s, 1H), 7.74 – 7.62 (m, 3H), 7.52 – 7.31 (m, 4H), 7.27 (dd,  $J$  = 7.1, 1.9 Hz, 1H), 2.44 (s, 3H, C(O)Me), 2.34 (s, 3H, Ts Me), 1.60 (d,  $J$  = 1.3 Hz, 3H, allyl Me).  $^{13}\text{C}$  NMR (126 MHz, DMSO)  $\delta$  199.59, 145.85, 143.48, 138.52, 137.95, 136.02, 135.01, 131.22, 129.60, 129.54, 129.45, 128.44, 127.05, 126.83, 25.86, 20.96, 12.48. IR (neat)  $\nu$  3185, 2923, 2853, 1664, 1366, 1328, 1165, 813, 667  $\text{cm}^{-1}$ . HRMS(FD $^+$ ) calcd. for  $\text{C}_{19}\text{H}_{20}\text{N}_2\text{O}_3\text{S}$  [M] $^+$  356.11946, found 356.11987.

#### 4-methyl-N'-((E)-2-((E)-2-(4-methylcyclohex-3-en-1-yl)prop-1-en-1-yl)benzylidene)benzenesulfonohydrazide (1i)

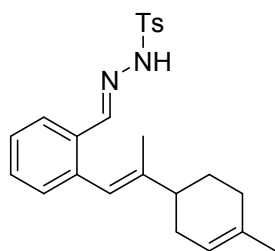

The reaction was performed according to general procedure F and purified by column chromatography (1:2 Et $_2$ O:hexanes). The product was isolated as a white solid (20%).

$^1\text{H}$  NMR (300 MHz, DMSO- $d_6$ )  $\delta$  11.44 (s, 1H), 7.99 (s, 1H), 7.74 (d,  $J$  = 7.9 Hz, 2H, tosyl), 7.66 (d,  $J$  = 7.8 Hz, 1H), 7.40 (d,  $J$  = 8.0 Hz, 2H, tosyl), 7.32 (d,  $J$  = 7.4 Hz, 1H), 7.24 (t,  $J$  = 7.6 Hz, 1H), 7.10 (d,  $J$  = 7.5 Hz, 1H), 6.29 (s, 1H, allyl CH), 5.43 (s, 1H, alkene cyclohexyl), 2.72 (s, 1H), 2.36 (s, 3H, Ts Me), 2.30 – 1.87 (m, 4H), 1.84 (d,  $J$  = 12.3 Hz, 1H), 1.65 (s, 3H, allyl Me), 1.46 (s, 3H, cyclohexyl Me), 1.23 (s, 1H).  $^{13}\text{C}$  NMR (101 MHz, DMSO)  $\delta$  145.75, 145.09, 143.42, 137.99, 136.16, 133.18, 131.22, 129.95, 129.67, 129.51, 127.14, 126.73, 124.76, 120.45, 120.12, 42.23, 30.35, 30.12, 27.35, 23.32, 20.99, 15.61. IR (neat)  $\nu$  3192, 2919, 1165, 758  $\text{cm}^{-1}$ . HRMS(FD $^+$ ) calcd. for  $\text{C}_{24}\text{H}_{28}\text{N}_2\text{O}_2\text{S}$  [M] $^+$  408.1871, found 408.1881.

#### 4-methyl-N'-((E)-2-((E)-2-phenylprop-1-en-1-yl)benzylidene)benzenesulfonohydrazide (1j)

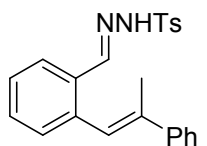

The reaction was performed according to general procedure F. The product was isolated as brown solid (quantitative yield).

$^1\text{H}$  NMR (400 MHz, DMSO- $d_6$ )  $\delta$  11.39 (s, 1H), 8.11 (s, 1H), 7.73 (dd,  $J$  = 8.4, 2.0 Hz, 4H), 7.63 – 7.58 (m, 2H), 7.49 – 7.23 (m, 7H), 6.98 (s, 1H), 2.36 (s, 3H, Ts Me), 1.90 (d,  $J$  = 1.4 Hz, 3H, Me).

**(E)-4-methyl-N'-(2-(2-methylprop-1-en-1-yl)benzylidene)benzenesulfonohydrazide (1k)**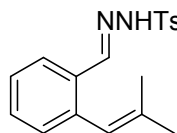

The reaction was performed according to general procedure F. The product was isolated as an off white solid (74%).

$^1\text{H NMR}$  (400 MHz,  $\text{DMSO-}d_6$ )  $\delta$  11.34 (s, 1H), 8.01 (s, 1H), 7.74 (d,  $J = 8.2$  Hz, 2H), 7.65 (d,  $J = 7.1$  Hz, 1H), 7.40 (d,  $J = 8.1$  Hz, 2H), 7.34 (t,  $J = 6.9$  Hz, 1H), 7.25 (t,  $J = 7.5$  Hz, 1H), 7.11 (d,  $J = 7.6$  Hz, 1H), 6.29 (br s, 1H), 2.36 (s, 3H), 1.86 (s, 3H), 1.47 (s, 3H).  $^{13}\text{C NMR}$  (101 MHz, DMSO)  $\delta$  145.96, 143.40, 137.84, 137.31, 136.13, 131.19, 129.97, 129.62, 129.51, 127.17, 126.74, 124.86, 121.86, 25.64, 20.99, 19.00. IR (neat)  $\nu$  3194, 2925, 1166, 669, 549  $\text{cm}^{-1}$ . HRMS( $\text{FD}^+$ ) calcd. for  $\text{C}_{18}\text{H}_{20}\text{N}_2\text{O}_2\text{S}$   $[\text{M}]^+$  328.1245, found 328.1233.

**(E)-N'-(2-(cyclohexylidenemethyl)benzylidene)-4-methylbenzenesulfonohydrazide (1l)**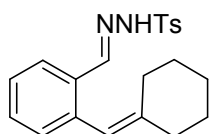

The reaction was performed according to general procedure F. The product was isolated as a white solid (96%).

$^1\text{H NMR}$  (300 MHz,  $\text{DMSO-}d_6$ )  $\delta$  11.39 (s, 1H), 8.02 (s, 1H), 7.74 (d,  $J = 8.2$  Hz, 2H), 7.65 (dd,  $J = 7.8, 1.5$  Hz, 1H), 7.40 (d,  $J = 8.0$  Hz, 2H), 7.33 (td,  $J = 7.5, 1.5$  Hz, 1H), 7.24 (t,  $J = 7.5$  Hz, 1H), 7.08 (d,  $J = 7.5$  Hz, 1H), 6.22 (s, 1H), 2.35 (s, 3H, Ts Me), 2.23 (t,  $J = 5.9$  Hz, 2H), 1.86 (t,  $J = 6.0$  Hz, 2H), 1.66 – 1.45 (m, 4H), 1.35 (q,  $J = 6.4, 5.7$  Hz, 2H).  $^{13}\text{C NMR}$  (101 MHz,  $\text{DMSO-}d_6$ )  $\delta$  145.94, 144.89, 143.40, 137.52, 136.16, 131.41, 130.00, 129.64, 129.55, 127.17, 126.76, 124.82, 118.61, 36.39, 29.18, 27.96, 26.93, 25.95, 21.00. IR (neat)  $\nu$  3205, 3183, 2926, 2851, 2361, 2342, 1167  $\text{cm}^{-1}$ . HRMS( $\text{FD}^+$ ) calcd. for  $\text{C}_{21}\text{H}_{24}\text{N}_2\text{O}_2\text{S}$   $[\text{M}]^+$  368.1558, found 368.1574.

**ethyl 2-((E)-2-((E)-2-tosylhydrazineylidene)methyl)benzylidene)butanoate (1m)**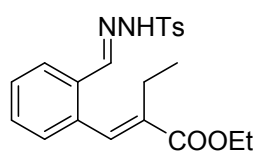

The reaction was performed according to general procedure F. The product was obtained as a 6:1 mixture of E:Z isomers and as an off white solid (96%).

$^1\text{H NMR}$  (400 MHz,  $\text{DMSO-}d_6$ )  $\delta$  11.45 (s, 1H), 7.96 (s, 1H), 7.77 – 7.62 (m, 4H), 7.46 – 7.32 (m, 4H), 7.20 (d,  $J = 7.3$  Hz, 1H), 4.23 (q,  $J = 7.1$  Hz, 2H), 2.35 (s, 3H), 2.10 (q,  $J = 7.3$  Hz, 2H), 1.29 (t,  $J = 7.1$  Hz, 3H), 0.88 (t,  $J = 7.4$  Hz, 3H).  $^{13}\text{C NMR}$  (75 MHz,  $\text{DMSO-}d_6$ )  $\delta$  166.67, 145.10, 143.48, 136.52, 136.26, 136.04, 134.88, 131.22, 129.77, 129.61, 128.95, 128.43, 127.17, 126.21, 60.54, 21.00, 20.57, 14.14, 13.32. IR (neat)  $\nu$  3186, 2978, 2935, 1707, 1448, 1242, 1168, 1048, 668, 548  $\text{cm}^{-1}$ . HRMS( $\text{FD}^+$ ) calcd. for  $\text{C}_{21}\text{H}_{24}\text{N}_2\text{O}_4\text{S}$   $[\text{M}]^+$  400.1457, found 400.1426.

**ethyl 2-((E)-2-((E)-2-tosylhydrazono)methyl)benzylidene)pentanoate (1n)**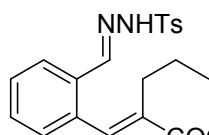

The reaction was performed according to general procedure F. The product was obtained as a 6:1 mixture of E:Z isomers and as an off white solid (quantitative).

$^1\text{H NMR}$  (300 MHz,  $\text{DMSO-}d_6$ )  $\delta$  11.46 (s, 1H), 7.95 (s, 1H), 7.81 – 7.56 (m, 4H), 7.49 – 7.34 (m, 4H), 7.19 (dd,  $J = 7.1, 1.7$  Hz, 1H), 4.22 (q,  $J = 7.1$  Hz, 2H), 3.42 – 3.34 (m, 2H), 2.35 (s, 3H), 2.12 – 2.04 (m, 2H), 1.29 (t,  $J = 7.1$  Hz, 3H), 0.63 (t,  $J = 7.3$  Hz, 3H).  $^{13}\text{C NMR}$  (101 MHz, DMSO)  $\delta$  166.84, 145.09, 143.44, 137.03, 136.07, 135.01, 134.93, 131.21, 129.73, 129.60, 128.98, 128.36, 127.16, 126.13, 60.53, 29.06, 21.55, 21.00, 14.13, 13.71. IR (neat)  $\nu$  3194, 2962, 2364, 1708, 1227, 1168, 668, 548  $\text{cm}^{-1}$ . HRMS( $\text{FD}^+$ ) calcd. for  $\text{C}_{22}\text{H}_{26}\text{N}_2\text{O}_4\text{S}$   $[\text{M}]^+$  414.1613, found 414.1598.

**ethyl 3-methyl-2-((E)-2-((E)-2-tosylhydrazineylidene)methyl)benzylidene)butanoate (1o)**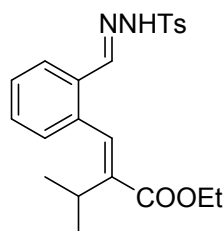

The reaction was performed according to general procedure F. The product was obtained as a 2:1 mixture of E:Z isomers and as a white solid (quantitative).

E-isomer:  $^1\text{H NMR}$  (400 MHz,  $\text{DMSO-}d_6$ )  $\delta$  11.47 (s, 1H), 8.02 (s, 1H), 7.75 (dd,  $J = 10.2, 8.1$  Hz, 2H), 7.66 – 7.58 (m, 1H), 7.40 (dd,  $J = 8.0, 6.3$  Hz, 2H), 7.35 – 7.26 (m, 2H), 7.08 – 6.98 (m, 1H), 6.85 (s, 1H), 3.84 (q,  $J = 7.1$  Hz, 1H), 2.81 – 2.66 (m, 1H), 2.37 (s, 3H), 1.14 (d,  $J = 6.9$  Hz, 6H), 0.79 (t,  $J = 7.1$  Hz, 3H). Z-isomer:  $^1\text{H NMR}$  (400 MHz,  $\text{DMSO-}d_6$ )  $\delta$  11.49 (s, 1H), 7.97 (s, 1H), 7.75 (dd,  $J = 10.2, 8.1$  Hz, 2H), 7.71 –

7.67 (m, 1H), 7.57 (s, 1H), 7.40 (dd,  $J = 8.0, 6.3$  Hz, 2H), 7.35 – 7.26 (m, 2H), 7.16 (d,  $J = 7.4$  Hz, 1H), 4.22 (q,  $J = 7.1$  Hz, 2H), 2.81 – 2.66 (m, 1H), 2.40 (s, 3H), 1.30 (t,  $J = 7.1$  Hz, 3H), 1.01 (d,  $J = 6.9$  Hz, 6H).  $^{13}\text{C}$  NMR (101 MHz, DMSO)  $\delta$  168.31, 145.37, 143.44, 143.02, 136.58, 136.20, 130.87, 129.65, 129.38, 128.13, 127.77, 127.60, 127.13, 125.57, 59.88, 31.95, 21.20, 14.11, 13.41. IR (neat)  $\nu$  3193, 2964, 2932, 2874, 1710, 1239, 1166, 1053, 668, 589, 549  $\text{cm}^{-1}$ . HRMS(FD<sup>+</sup>) calcd. for  $\text{C}_{22}\text{H}_{26}\text{N}_2\text{O}_4\text{S}$  [M]<sup>+</sup> 414.1613, found 414.1618.

#### ethyl 2-((E)-4-methoxy-2-((E)-(2-tosylhydrazineylidene)methyl)benzylidene)butanoate (1p)

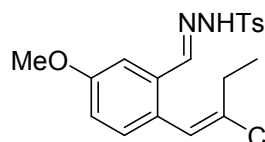

The reaction was performed according to general procedure F. The product was obtained as a 8:1 mixture of E:Z isomers and as a white solid (65%).

$^1\text{H}$  NMR (300 MHz,  $\text{CDCl}_3$ )  $\delta$  7.94 – 7.76 (m, 4H), 7.63 (s, 1H), 7.36 (d,  $J = 2.5$  Hz, 1H), 7.30 (d,  $J = 8.0$  Hz, 2H), 7.09 (d,  $J = 8.5$  Hz, 1H), 6.93 (dd,  $J = 8.5, 2.4$  Hz, 1H), 4.28 (q,  $J = 6.8$  Hz, 2H), 3.85 (s, 3H), 2.40 (s, 3H), 2.23 (q,  $J = 7.4$  Hz, 2H), 1.35 (t,  $J = 7.1$  Hz, 3H), 0.97 (t,  $J = 7.4$  Hz, 3H).  $^{13}\text{C}$  NMR (75 MHz, DMSO)  $\delta$  167.31, 159.46, 145.36, 144.01, 136.62, 136.42, 135.96, 133.17, 131.01, 130.08, 127.70, 127.68, 116.38, 111.11, 60.92, 55.73, 21.47, 21.00, 14.62, 13.87. IR (neat)  $\nu$  3187, 2977, 2937, 1705, 1597, 1562, 1494, 1456, 1236, 1166, 1131, 1046, 907, 667, 548  $\text{cm}^{-1}$ . HRMS(FD<sup>+</sup>) calcd. for  $\text{C}_{22}\text{H}_{26}\text{N}_2\text{O}_5\text{S}$  [M]<sup>+</sup> 430.1562, found 430.1549.

#### ethyl 2-((E)-4,5-dimethoxy-2-((E)-(2-tosylhydrazineylidene)methyl)benzylidene)butanoate (1q)

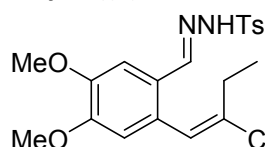

The reaction was performed according to general procedure F. The product was obtained as a 7.5:1 mixture of E:Z isomers and as a yellow solid (96%).

$^1\text{H}$  NMR (300 MHz,  $\text{DMSO}-d_6$ )  $\delta$  11.23 (s, 1H), 7.88 (s, 1H), 7.74 (d,  $J = 8.1$  Hz, 2H), 7.63 (s, 1H), 7.38 (d,  $J = 8.1$  Hz, 2H), 7.18 (s, 1H), 6.74 (s, 1H), 4.22 (q,  $J = 7.1$  Hz, 2H), 3.79 (s, 3H), 3.77 (s, 3H), 2.35 (s, 3H), 2.15 (q,  $J = 7.2$  Hz, 2H), 1.28 (t,  $J = 7.1$  Hz, 3H), 0.92 (t,  $J = 7.3$  Hz, 3H).  $^{13}\text{C}$  NMR (75 MHz, DMSO)  $\delta$  166.73, 149.98, 148.64, 145.07, 143.41, 136.05, 136.00, 129.52, 128.25, 128.23, 127.25, 123.99, 111.63, 108.02, 60.44, 55.59, 55.44, 20.97, 20.68, 14.14, 13.24. IR (neat)  $\nu$  3194, 2963, 2930, 2360, 2342, 1707, 1595, 1510, 1463, 1343, 1278, 1239, 1168, 1117, 1046, 668, 549  $\text{cm}^{-1}$ . HRMS(FD<sup>+</sup>) calcd. for  $\text{C}_{23}\text{H}_{28}\text{N}_2\text{O}_6\text{S}$  [M]<sup>+</sup> 460.1668, found 460.1669.

#### General Procedure G, catalytic reaction.

Under Schlenk conditions the tosyl hydrazone (1 eq), LiOtBu (1.2 eq) and [Co(TPP)] (0.05 eq) were put together after which the tube was evacuated for 15 min. and then refilled with  $\text{N}_2$ . Next benzene (2 mL) was added and the mixture was heated to 60 °C over night in a dark fumehood. The mixture was then filtered over a silica plug and eluted with EtOAc. After concentration the product was purified by column chromatography.

#### ethyl 3,4-dihydronaphthalene-2-carboxylate (2a)

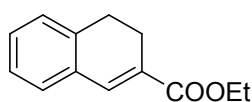

The reaction was performed according to general procedure G. The product was isolated by column chromatography (20:1 hexanes:EtOAc) and obtained as red oil (89%)

$^1\text{H}$  NMR (400 MHz,  $\text{CDCl}_3$ )  $\delta$  7.55 (d,  $J = 1.7$  Hz, 1H), 7.34 – 7.11 (m, 4H), 4.30 (q,  $J = 7.1$  Hz, 2H), 2.89 (dd,  $J = 9.2, 7.3$  Hz, 2H), 2.64 (td,  $J = 8.1, 7.6, 1.5$  Hz, 2H), 1.38 (t,  $J = 7.1$  Hz, 3H).  $^{13}\text{C}$  NMR (75 MHz,  $\text{CDCl}_3$ )  $\delta$  167.46, 136.98, 136.30, 132.62, 129.59, 129.40, 128.41, 127.64, 126.71, 60.62, 27.64, 22.26, 14.38.



### ethyl 6-fluoro-3,4-dihydronaphthalene-2-carboxylate (**2b**)

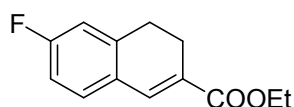

The reaction was performed according to general procedure G. The product was purified by column chromatography (9:1 hexanes:EtOAc) and obtained as a yellow oil (76%).

$^1\text{H}$  NMR (300 MHz,  $\text{CDCl}_3$ )  $\delta$  7.49 (s, 1H), 7.17 (dd,  $J = 9.1, 5.6$  Hz, 1H), 6.89 (ddd,  $J = 8.9, 5.9, 2.6$  Hz, 2H), 4.27 (q,  $J = 7.1$  Hz, 2H,  $\text{COOCH}_2\text{CH}_3$ ), 2.85 (t,  $J = 8.3$  Hz, 2H, Ar- $\text{CH}_2$ -CH $_2$ ), 2.59 (t,  $J = 8.3$  Hz, 2H, Ar- $\text{CH}_2$ -CH $_2$ ), 1.35 (t,  $J = 7.1$  Hz, 3H,  $\text{COOCH}_2\text{CH}_3$ ).  $^{13}\text{C}$  NMR (126 MHz,  $\text{CDCl}_3$ )  $\delta$  167.43 (s, C=O), 163.35 (d,  $J = 249.8$  Hz, CF), 139.80 (d,  $J = 7.8$  Hz, CF-CH-C-C-CH-CH), 135.36 (s), 130.10 (d,  $J = 8.6$  Hz, CF-CH-C-C-CH-CH), 129.03 (d,  $J = 3.0$  Hz, CF-CH-C-C-CH-CH), 128.97 (s), 115.11 (d,  $J = 21.9$  Hz, CF-CH-C-C-CH-CH), 113.59 (d,  $J = 21.7$  Hz, CF-CH-C-C-CH-CH), 60.77 (s,  $\text{COOCH}_2\text{CH}_3$ ), 28.02 (s, Ar- $\text{CH}_2$ -CH $_2$ ), 21.98 (s, Ar- $\text{CH}_2$ -CH $_2$ ), 14.49 (s,  $\text{COOCH}_2\text{CH}_3$ ). IR (neat)  $\nu$  2979, 2903, 1703, 1494, 1299, 1237  $\text{cm}^{-1}$ . HRMS(EI $^+$ ) calcd. for  $\text{C}_{13}\text{H}_{13}\text{FO}_2$  [ $\text{M}^+$ ] 220.0900, found 220.0909.

### ethyl 7-fluoro-3,4-dihydronaphthalene-2-carboxylate (**2c**)

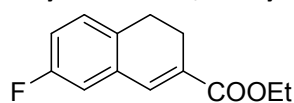

The reaction was performed according to general procedure G. The product was purified by column chromatography (19:1 hexanes:EtOAc) and obtained as a yellow oil (74%).

$^1\text{H}$  NMR (300 MHz,  $\text{CDCl}_3$ )  $\delta$  7.45 (s, 1H), 7.11 (dd,  $J = 8.3, 5.8$  Hz, 1H), 7.02 – 6.84 (m, 2H), 4.28 (q,  $J = 7.1$  Hz, 2H), 2.83 (t,  $J = 8.3$  Hz, 2H), 2.70 – 2.49 (m, 2H), 1.35 (t,  $J = 7.1$  Hz, 3H).  $^{13}\text{C}$  NMR (126 MHz,  $\text{CDCl}_3$ )  $\delta$  167.26 (s), 161.74 (d,  $J = 243.8$  Hz), 135.36 (d,  $J = 2.8$  Hz), 134.35 (d,  $J = 8.1$  Hz), 132.50 (d,  $J = 3.2$  Hz), 131.18 (s), 128.90 (d,  $J = 7.9$  Hz), 115.78 (d,  $J = 21.3$  Hz), 114.92 (d,  $J = 21.6$  Hz), 60.90 (s), 27.04 (s), 22.61 (s), 14.46 (s).  $^{19}\text{F}$  NMR (282 MHz,  $\text{CDCl}_3$ )  $\delta$  -116.67. IR (neat)  $\nu$  2980, 2896, 1706, 1493, 1277, 1232  $\text{cm}^{-1}$ . HRMS (EI $^+$ ) calcd. for  $\text{C}_{13}\text{H}_{13}\text{FO}_2$  [ $\text{M}^+$ ] 220.0900, found 220.0905.

### ethyl 6-(trifluoromethyl)-3,4-dihydronaphthalene-2-carboxylate (**2d**)

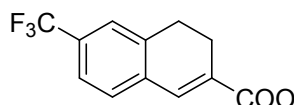

The reaction was performed according to general procedure G. The product was purified by column chromatography (9:1 hexanes:EtOAc) and obtained as a red oil (65%).

$^1\text{H}$  NMR (300 MHz,  $\text{CDCl}_3$ )  $\delta$  7.52 (s, 1H), 7.45 (d,  $J = 8.2$  Hz, 1H), 7.41 (s, 1H), 7.29 (d,  $J = 7.9$  Hz, 1H), 4.29 (q,  $J = 7.1$  Hz, 2H), 2.92 (t,  $J = 8.3$  Hz, 2H), 2.65 (td,  $J = 8.5, 1.5$  Hz, 2H), 1.36 (t,  $J = 7.1$  Hz, 3H).  $^{13}\text{C}$  NMR (126 MHz,  $\text{CDCl}_3$ )  $\delta$  167.05 (s), 137.61 (s), 135.98 (s), 134.81 (s), 132.36 (s), 130.99 (q,  $J = 32.2$  Hz), 128.45 (s), 124.55 (q,  $J = 3.9$  Hz), 124.16 (q,  $J = 272.1$  Hz), 123.83 (q,  $J = 4.1$  Hz), 61.03 (s), 27.64 (s), 22.24 (s), 14.46 (s).  $^{19}\text{F}$  NMR (282 MHz,  $\text{CDCl}_3$ )  $\delta$  -62.72. IR (neat)  $\nu$  2982, 1704, 1317, 1272, 1162, 1117, 1068, 831, 738  $\text{cm}^{-1}$ . HRMS(EI $^+$ ) calcd. for  $\text{C}_{14}\text{H}_{13}\text{F}_3\text{O}_2$  [ $\text{M}^+$ ] 270.0868, found 270.0882.

### ethyl 7-methyl-3,4-dihydronaphthalene-2-carboxylate (**2e**)

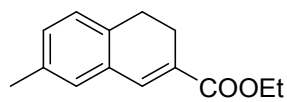

The reaction was performed according to general procedure G. The product was purified by column chromatography (9:1 hexanes:EtOAc) and obtained as a red oil (40%).

$^1\text{H}$  NMR (300 MHz,  $\text{CDCl}_3$ )  $\delta$  7.49 (d,  $J = 1.6$  Hz, 1H), 7.10 – 6.97 (m, 3H), 4.27 (q,  $J = 7.1$  Hz, 2H), 2.82 (t,  $J = 8.2$  Hz, 2H), 2.59 (t,  $J = 8.2$  Hz, 2H), 2.32 (s, 3H), 1.35 (t,  $J = 7.1$  Hz, 3H).  $^{13}\text{C}$  NMR (75 MHz,  $\text{CDCl}_3$ )  $\delta$  167.65, 136.60, 136.32, 134.10, 132.63, 130.16, 129.64, 129.24, 127.60, 60.69, 27.35, 22.58, 21.09, 14.49. IR (neat)  $\nu$  2929, 1700, 1275, 1227, 1198, 1170, 1070  $\text{cm}^{-1}$ . HRMS(FD $^+$ ) calcd. for  $\text{C}_{14}\text{H}_{16}\text{O}_2$  [ $\text{M}^+$ ] 216.11503, found 216.11524.

### ethyl 6-methoxy-3,4-dihydronaphthalene-2-carboxylate (**2f**)

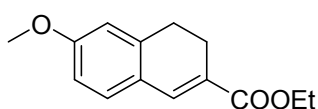

The reaction was performed according to general procedure G. The product was purified by column chromatography (6:1 hexanes:EtOAc) and obtained as a red oil (75%).

$^1\text{H}$  NMR (400 MHz,  $\text{CDCl}_3$ )  $\delta$  7.49 (d,  $J = 1.4$  Hz, 1H), 7.19 – 7.08 (m, 1H), 6.78 – 6.68 (m, 2H), 4.26 (q,  $J = 7.1$  Hz, 2H), 3.82 (s, 3H, OMe), 2.84 (t,  $J = 8.3$  Hz, 2H), 2.59 (ddd,  $J = 9.5, 7.6, 1.5$  Hz, 2H), 1.34 (t,  $J = 7.1$  Hz, 3H).  $^{13}\text{C}$  NMR (101 MHz,  $\text{CDCl}_3$ )  $\delta$  167.76, 160.73, 139.18, 136.22, 129.96, 126.90, 125.90, 113.88, 111.69, 60.55, 55.43, 28.33, 22.21, 14.52. IR (neat)  $\nu$  2901, 2836, 1695, 1604, 1272, 1247, 1196, 1069, 1032, 808  $\text{cm}^{-1}$ . HRMS( $\text{FD}^+$ ) calcd. for  $\text{C}_{14}\text{H}_{16}\text{O}_3$  [ $\text{M}^+$ ] 232.10994, found 232.10916.

### ethyl 6,7-dimethoxy-3,4-dihydronaphthalene-2-carboxylate (2g)

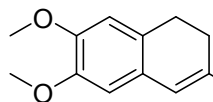

The reaction was performed according to general procedure G. The product was purified by column chromatography (4:1 hexanes:EtOAc) and obtained as a red oil (71%).

$^1\text{H}$  NMR (300 MHz,  $\text{CDCl}_3$ )  $\delta$  7.47 (s, 1H), 6.75 (s, 1H), 6.71 (s, 1H), 4.26 (q,  $J = 7.1$  Hz, 2H), 3.90 (s, 3H), 3.87 (s, 3H), 2.81 (t,  $J = 8.4$  Hz, 2H), 2.58 (t,  $J = 8.4$  Hz, 2H), 1.34 (t,  $J = 7.1$  Hz, 3H).  $^{13}\text{C}$  NMR (126 MHz,  $\text{CDCl}_3$ )  $\delta$  167.69, 150.04, 147.70, 136.32, 130.47, 127.33, 125.43, 111.94, 111.30, 60.56, 56.26, 56.15, 27.66, 22.46, 14.53. IR (neat)  $\nu$  2956, 2834, 1699, 1464, 1240, 1200  $\text{cm}^{-1}$ . HRMS ( $\text{EI}^+$ ) calcd. for  $\text{C}_{15}\text{H}_{18}\text{O}_4$  [ $\text{M}^+$ ] 262.1205, found 262.1216.

### 1-(3,4-dihydronaphthalen-2-yl)ethan-1-one (2h)

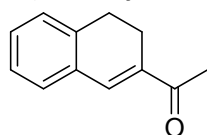

The reaction was performed according to general procedure G. The product was purified by column chromatography (4:1 hexanes:EtOAc) and obtained as a red oil (35%).

$^1\text{H}$  NMR (400 MHz,  $\text{CDCl}_3$ )  $\delta$  7.39 (s, 1H), 7.31 – 7.19 (m, 3H), 7.18 (d,  $J = 7.3$  Hz, 1H), 2.84 (t,  $J = 8.2$  Hz, 2H), 2.59 (t,  $J = 8.2$  Hz, 2H), 2.45 (s, 3H).

### 3-(4-methylcyclohex-3-en-1-yl)-1,2-dihydronaphthalene (2i)

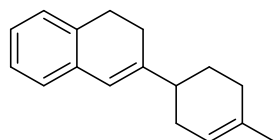

The reaction was performed according to general procedure G. The product was purified by column chromatography (hexanes) and obtained as a light yellow oil (44%).

$^1\text{H}$  NMR (400 MHz, Chloroform- $d$ )  $\delta$  7.16 – 7.04 (m, 3H), 7.00 (d,  $J = 7.3$  Hz, 1H), 6.24 (s, 1H), 5.44 (d,  $J = 5.0$  Hz, 1H), 2.79 (t,  $J = 8.1$  Hz, 2H), 2.38 – 2.27 (m, 1H), 2.27 (t,  $J = 8.1$  Hz, 2H), 2.20 – 1.93 (m, 4H), 1.88 (ddq,  $J = 12.6, 4.6, 2.2$  Hz, 1H), 1.68 (s, 3H), 1.59 (ddt,  $J = 17.1, 11.6, 5.6$  Hz, 1H).  $^{13}\text{C}$  NMR (101 MHz,  $\text{CDCl}_3$ )  $\delta$  146.61, 135.17, 134.88, 134.02, 127.22, 126.54, 126.16, 125.66, 120.73, 120.62, 41.13, 30.56, 30.53, 28.56, 27.68, 26.02, 23.69. IR (neat)  $\nu$  3042, 2922, 2885, 2853, 2831, 1486, 1452, 1436, 747  $\text{cm}^{-1}$ . HRMS( $\text{FD}^+$ ) calcd. for  $\text{C}_{17}\text{H}_{20}$  [ $\text{M}^+$ ] 224.15650, found 224.15937.

### 3-phenyl-1,2-dihydronaphthalene with 2-phenylnaphthalene (2j)

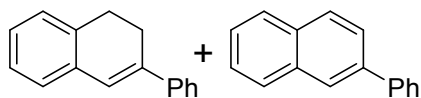

The reaction was performed according to general procedure G.

The product was isolated as a white solid in a 2:1 mixture of the dihydronaphthalene and naphthalene after column chromatography in hexanes (50% 2*H*-naphthalene and 28% naphthalene).

$^1\text{H}$  NMR (300 MHz,  $\text{CDCl}_3$ )  $\delta$  8.05 (d,  $J = 1.8$  Hz, 1H, naphthalene), 7.97 – 7.81 (m, 3H, naphthalene), 7.75 (ddd,  $J = 8.1, 6.8, 1.4$  Hz, 3H, naphthalene), 7.59 – 7.54 (m, 2H, 2*H*-naphthalene), 7.50 (m, 4H, naphthalene), 7.43 – 7.35 (m, 2H 2*H*-naphthalene + 1H naphthalene), 7.32 – 7.28 (m, 1H, 2*H*-naphthalene), 7.23 – 7.10 (m, 4H, 2*H*-naphthalene), 6.86 (d,  $J = 1.4$  Hz, 1H, 2*H*-naphthalene alkene), 2.97 (dd,  $J = 9.2, 6.9$  Hz, 2H, 2*H*-naphthalene), 2.77 (dd,  $J = 9.1, 6.9$  Hz, 2H, 2*H*-naphthalene).

### 3-methyl-1,2-dihydronaphthalene (2k)

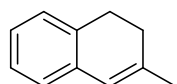

The reaction was performed according to general procedure G. The product was purified by column chromatography (hexane) and obtained as a colorless liquid (21%, 68% based on NMR with standard).

$^1\text{H}$  NMR (300 MHz,  $\text{CDCl}_3$ )  $\delta$  7.22 – 7.01 (m, 3H), 6.96 (d,  $J = 7.0$  Hz, 1H), 6.22 (q,  $J = 1.6$  Hz, 1H), 2.82 (t,  $J = 8.2$  Hz, 2H), 2.32 – 2.14 (m, 2H), 1.92 (s, 3H).  $^{13}\text{C}$  NMR (75 MHz,  $\text{CDCl}_3$ )  $\delta$  138.41, 135.17, 134.17, 127.28, 126.49, 126.06, 125.20, 122.82, 28.99, 28.21, 23.66.

### 1,2,3,4,4a,10-hexahydroanthracene (2l)

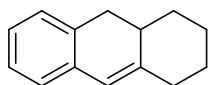

The reaction was performed according to general procedure G. The product was purified by column chromatography (PE) and obtained as a white solid (17%).

$^1\text{H}$  NMR (300 MHz,  $\text{CDCl}_3$ )  $\delta$  7.17 – 7.09 (m, 1H), 7.09 – 7.04 (m, 2H), 6.97 (d,  $J = 7.1$  Hz, 1H), 6.16 (d,  $J = 2.3$  Hz, 1H), 2.93 (dd,  $J = 15.5, 7.2$  Hz, 1H), 2.59 (dd,  $J = 15.4, 12.5$  Hz, 1H), 2.52 – 2.32 (m, 2H), 2.25 – 1.98 (m, 2H), 1.93 – 1.80 (m, 2H), 1.49 – 1.20 (m, 3H).

### ethyl (E)-2-(2-methylbenzylidene)but-3-enoate (3m)

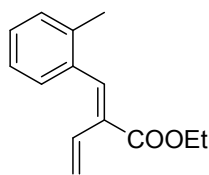

The reaction was performed according to general procedure G. The product was purified by column chromatography (20:1 hexanes:EtOAc) and obtained as a red liquid (85%).

$^1\text{H}$  NMR (300 MHz,  $\text{CDCl}_3$ )  $\delta$  7.64 (s, 1H), 7.37 – 7.16 (m, 4H), 6.51 (dd,  $J = 17.7, 11.6$  Hz, 1H), 5.87 (dd,  $J = 17.8, 1.8$  Hz, 1H), 5.38 (dt,  $J = 11.6, 1.6$  Hz, 1H), 4.37 (q,  $J = 7.1$  Hz, 2H), 2.34 (s, 3H), 1.42 (t,  $J = 7.1$  Hz, 3H).  $^{13}\text{C}$  NMR (101 MHz,  $\text{CDCl}_3$ )  $\delta$  167.26, 138.54, 136.87, 134.39, 130.83, 129.96, 129.58, 129.50, 128.41, 125.37, 120.19, 60.83, 19.86, 14.18. IR (neat)  $\nu$  3019, 1714, 1242, 1139, 1063, 923, 794, 748  $\text{cm}^{-1}$ . HRMS(FD $^+$ ) calcd. for  $\text{C}_{14}\text{H}_{16}\text{O}_2$  [M] $^+$  216.1150, found 216.1145.

### ethyl (E)-2-((E)-2-methylbenzylidene)pent-3-enoate (3n)

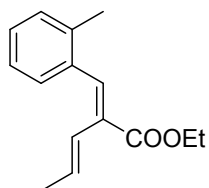

The reaction was performed according to general procedure G. The product was purified by column chromatography (100:1 hexanes:EtOAc) and obtained as a colorless liquid (95%).

$^1\text{H}$  NMR (300 MHz,  $\text{CDCl}_3$ )  $\delta$  7.42 (s, 1H), 7.34 – 7.16 (m, 4H), 6.32 (dq,  $J = 15.9, 6.4$  Hz, 1H), 6.18 (d,  $J = 16.0$  Hz, 1H), 4.34 (q,  $J = 7.1$  Hz, 2H), 2.31 (s, 3H), 1.79 (d,  $J = 6.2$  Hz, 3H), 1.40 (t,  $J = 7.1$  Hz, 3H).  $^{13}\text{C}$  NMR (75 MHz,  $\text{CDCl}_3$ )  $\delta$  167.97, 136.93, 135.70, 134.92, 132.25, 131.09, 130.04, 129.64, 128.17, 125.44, 123.95, 60.89, 20.00, 19.24, 14.32. IR (neat)  $\nu$  2929, 1713, 1446, 1373, 1296, 1238, 1130, 744  $\text{cm}^{-1}$ . HRMS(EI $^+$ ) calcd. for  $\text{C}_{15}\text{H}_{18}\text{O}_2$  [M] $^+$  230.1307, found 230.1315.

### ethyl (E)-3-methyl-2-(2-methylbenzylidene)but-3-enoate (3o)

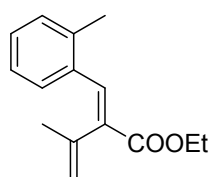

The reaction was performed according to general procedure G. The product was purified by column chromatography (40:1 hexanes:EtOAc) and isolated containing 10% cycloheptatriene (*vide infra*) obtained as a yellow oil (83%). This compound was obtained as a mixture of ~90% **3o** and ~10% **4**. It proved difficult to isolate compound **3o**, free from **4**.

$^1\text{H}$  NMR (400 MHz,  $\text{CDCl}_3$ )  $\delta$  7.72 (s, 1H), 7.38 (d,  $J = 7.6$  Hz, 1H), 7.23 – 7.15 (m, 2H), 7.12 (td,  $J = 7.1, 2.3$  Hz, 1H), 5.07 (t,  $J = 1.7$  Hz, 1H), 4.85 – 4.71 (m, 1H), 4.29 (q,  $J = 7.1$  Hz, 2H), 2.34 (s, 3H), 1.91 (d,  $J = 1.2$  Hz, 3H), 1.35 (t,  $J = 7.1$  Hz, 3H).  $^{13}\text{C}$  NMR (126 MHz,  $\text{CDCl}_3$ , proton coupled)  $\delta$  167.39, 138.87 (d,  $J = 239.2$  Hz), 137.41, 137.03, 135.79, 134.73, 129.93 (d,  $J = 57.8$  Hz), 128.72 (d,  $J = 12.3$  Hz), 128.25 (d,  $J = 11.6$  Hz), 125.50 (d,  $J = 57.2$  Hz), 117.90 (t,  $J = 18.6$  Hz), 60.98 (t,  $J = 5.2$  Hz), 22.88 (q,  $J = 29.8$  Hz), 20.02 (q,  $J = 23.7$  Hz), 14.27 (q,  $J = 39.1, 38.1$  Hz). HRMS(EI $^+$ ) calcd. for  $\text{C}_{15}\text{H}_{18}\text{O}_2$  [M] $^+$  230.1307, found 230.1315.

#### ethyl (Z)-2-(2-(cyclohepta-2,4,6-trien-1-yl)benzylidene)-3-methylbutanoate (**4**)

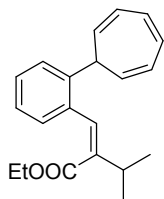

This compound was characterized from a mixture of ~90% **3o** and ~10% **4**.

$^1\text{H NMR}$  (400 MHz,  $\text{CDCl}_3$ )  $\delta$  7.47 (d,  $J = 7.7$  Hz, 1H), 7.34 – 7.28 (m, 1H), 7.24 – 7.07 (m, 3H), 6.72 (t,  $J = 3.2$  Hz, 2H), 6.61 (s, 1H), 6.25 (d,  $J = 8.9$  Hz, 2H), 5.43 (dd,  $J = 9.2, 5.5$  Hz, 2H), 3.95 (q,  $J = 7.2$  Hz, 2H), 2.80 – 2.71 (m, 1H), 1.09 (d,  $J = 6.8$  Hz, 6H), 0.90 (t,  $J = 7.1$  Hz, 3H). HRMS(EI $^+$ ) calcd. for  $\text{C}_{19}\text{H}_{18}\text{O}$  [ $\text{M}-\text{EtOH}$ ] $^+$  262.1358, found 262.1338.

#### ethyl (E)-2-(4-methoxy-2-methylbenzylidene)but-3-enoate (**3p**)

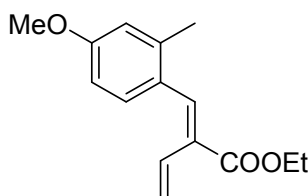

The reaction was performed according to general procedure G. The product was purified by column chromatography (9:1 hexanes:EtOAc) and obtained as a red oil (89%).

$^1\text{H NMR}$  (400 MHz,  $\text{CDCl}_3$ )  $\delta$  7.57 (s, 1H), 7.24 (d,  $J = 8.4$  Hz, 1H), 6.80 – 6.69 (m, 2H), 6.50 (dd,  $J = 17.7, 11.6$  Hz, 1H), 5.83 (d,  $J = 17.7$  Hz, 1H), 5.34 (d,  $J = 11.6$  Hz, 1H), 4.32 (q,  $J = 7.1$  Hz, 2H), 3.81 (s, 3H), 2.30 (s, 3H), 1.37 (t,  $J = 7.1$  Hz, 3H).  $^{13}\text{C NMR}$  (101 MHz,  $\text{CDCl}_3$ )  $\delta$  167.71, 160.00, 139.28, 138.42, 131.52, 130.08, 129.73, 127.04, 119.99, 115.82, 110.90, 60.95, 55.35, 20.41, 14.44. IR (neat)  $\nu$  2959, 2934, 2360, 1712, 1604, 1495, 1302, 1249, 1139, 1037, 819, 569  $\text{cm}^{-1}$ . HRMS(EI $^+$ ) calcd. for  $\text{C}_{15}\text{H}_{18}\text{O}_3$  [ $\text{M}$ ] $^+$  246.1256, found 246.1255.

#### ethyl (E)-2-(4,5-dimethoxy-2-methylbenzylidene)but-3-enoate (**3q**)

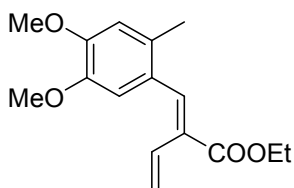

The reaction was performed according to general procedure G. The product was purified by column chromatography (6:1 hexanes:EtOAc) and obtained as a red oil (90%).

$^1\text{H NMR}$  (400 MHz,  $\text{CDCl}_3$ )  $\delta$  7.58 (s, 1H), 6.85 (s, 1H), 6.71 (s, 1H), 6.60 – 6.42 (m, 2H), 5.82 (dd,  $J = 17.8, 1.5$  Hz, 1H), 5.36 (dt,  $J = 11.6, 1.5$  Hz, 2H), 4.31 (q,  $J = 7.1$  Hz, 2H), 3.89 (s, 3H), 3.82 (s, 3H), 2.26 (s, 3H), 1.37 (t,  $J = 7.1$  Hz, 3H).  $^{13}\text{C NMR}$  (101 MHz,  $\text{CDCl}_3$ )  $\delta$  167.62, 149.30, 146.53, 138.61, 130.50, 130.13, 129.78, 126.38, 120.17, 113.30, 113.26, 60.98, 56.18, 55.98, 19.62, 14.43. IR (neat)  $\nu$  2934, 2361, 2342, 1714, 1605, 1512, 1465, 1275, 1250, 1215, 1172, 1109, 1035, 1004, 868  $\text{cm}^{-1}$ . HRMS(EI $^+$ ) calcd. for  $\text{C}_{16}\text{H}_{20}\text{O}_4$  [ $\text{M}$ ] $^+$  276.1362, found 276.1363.

## NMR kinetic investigations.

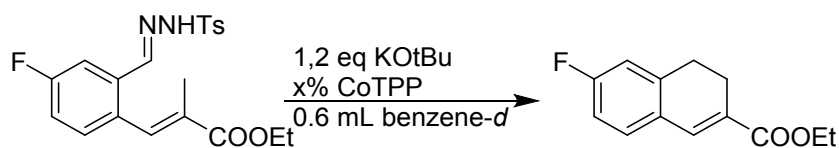

[Co(TPP)] (x eq, 671.65 g/mol), ethyl (E)-3-(4-fluoro-2-((E)-(2-tosylhydrazono)methyl)phenyl)-2-methylacrylate (1 eq, 0.006 mmol, 2.4 mg) and 1,3,5-trimethoxybenzene (0.1 eq, 0.0006 mg, 0.10 mg) were combined in a pressure NMR tube which was then evacuated. LiO<sup>t</sup>Bu (1.2 eq, 0.0072 mmol, 0.6 mg) was dissolved in benzene-*d* (0.6 mL) and added to the pressure NMR tube. The resulting mixture was dissolved as much as possible by tilting and using a vortex. The tube was next entered in the preheated NMR machine (346K) with spinning and immediately spectra were measured with 16 scans.

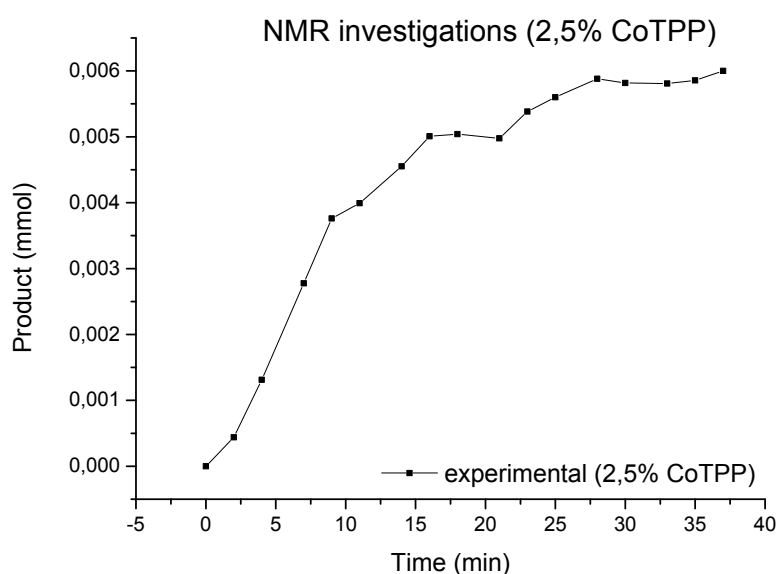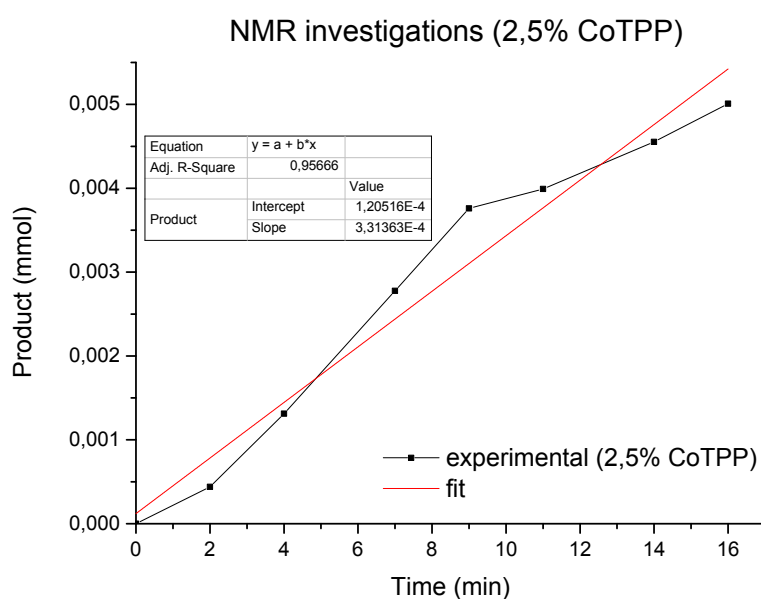

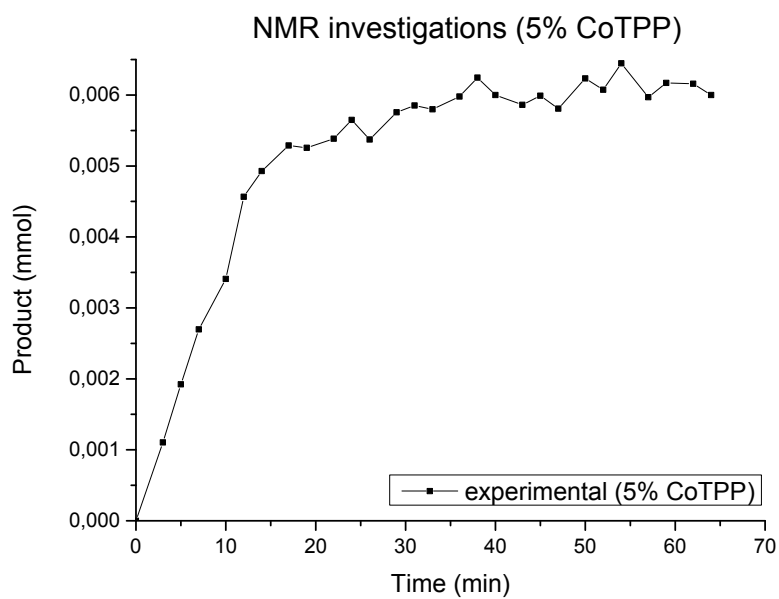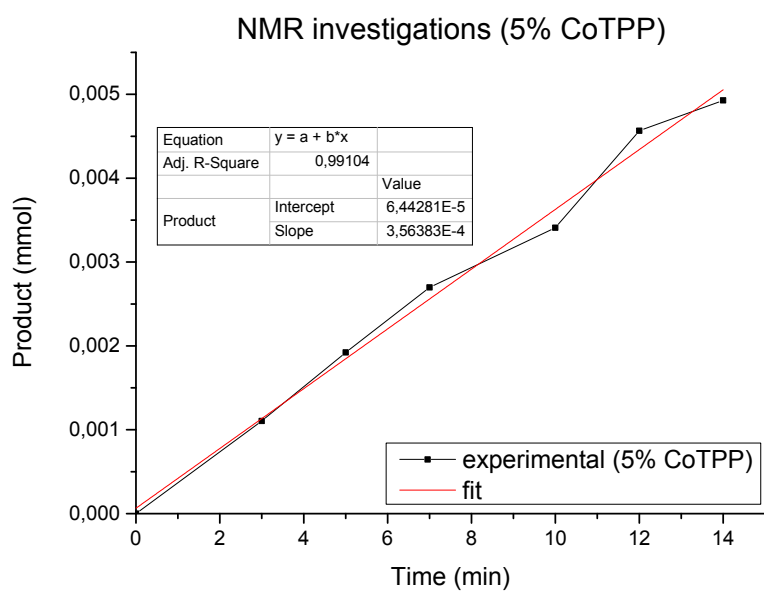

Ln plot of experimental (5% CoTPP)

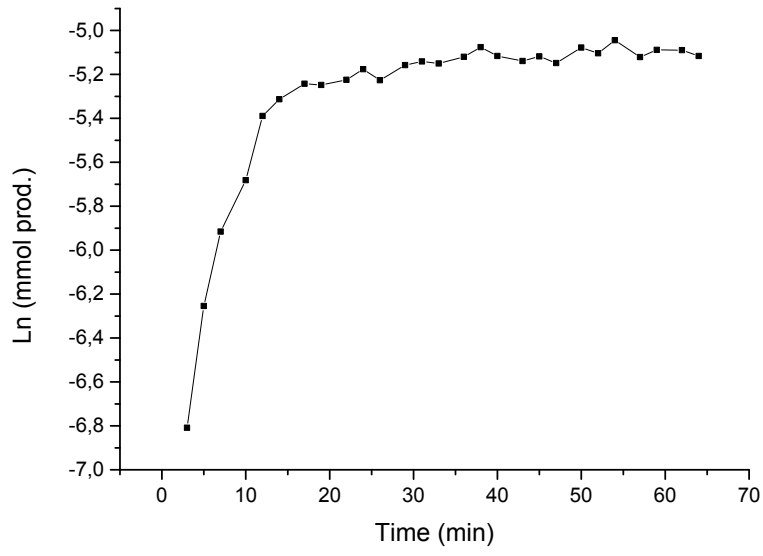

1/ plot of experimental (5% CoTPP)

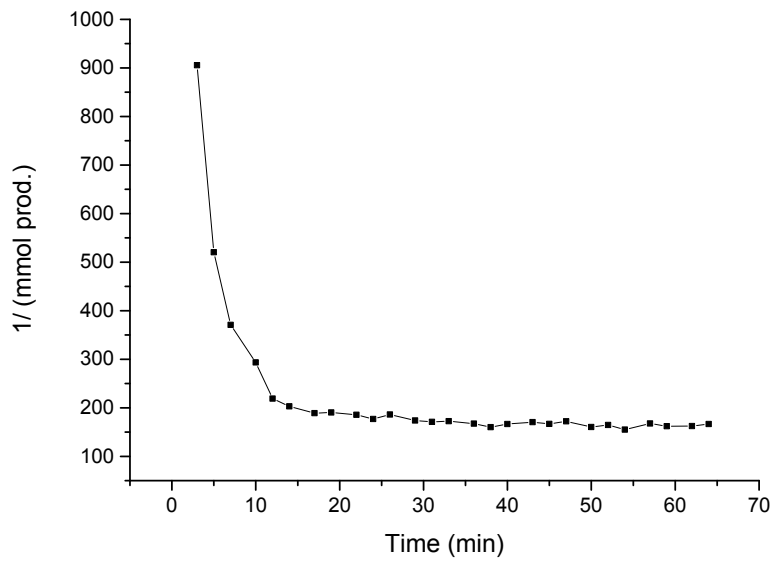

## Spin trapping

Under Schlenk conditions ethyl (E)-3-(4-fluoro-2-((E)-(2-tosylhydrazono)methyl)phenyl)-2-methylacrylate (1 eq, 0.05 mmol) and LiOtBu (1.2 eq, 0.06 mmol) in dry benzene (1 mL) were heated to 60°C for 20 min. After cooling down a mixture of [Co(TPP)] (0.05 eq, 0.0025 mmol) and PBN (2 eq, 0.10 mmol) in dry benzene was added. This was stirred and a sample was transferred to an EPR tube and sealed with parafilm. The same solution was also investigated using ESI<sup>+</sup>. Note that the PBN (fragment) is drawn attached to the allylic carbon, but this could also be at the carbene carbon.

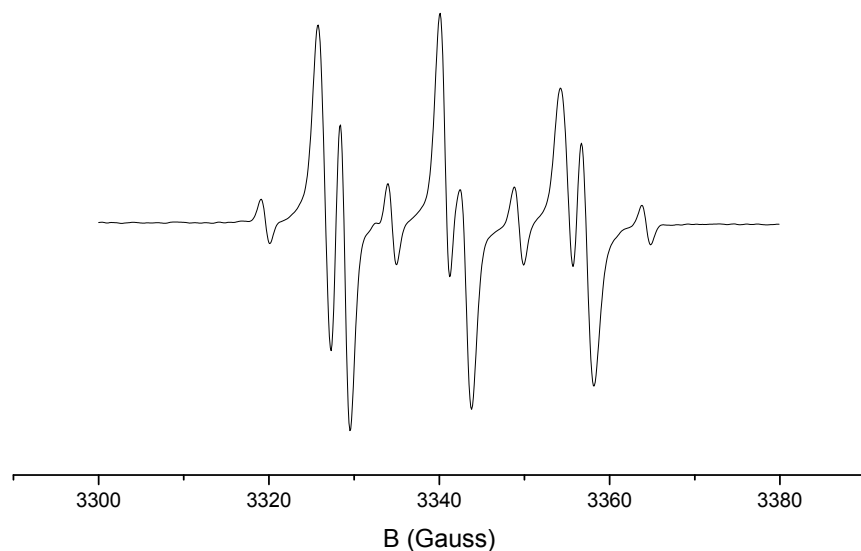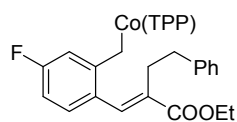

$C_{64}H_{48}CoFLiN_4O_2$   
Calcd. mass 989.3255  
Found. 989.2945

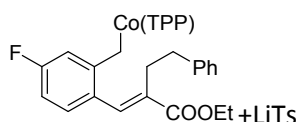

$C_{71}H_{55}CoFLi_2N_4O_4S$   
Calcd. mass 1151.3583  
Found. 1151.3042

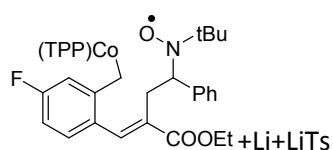

$C_{75}H_{63}CoFLi_2N_5O_5S$   
Calcd. mass 1237.4189  
Found 1237.4507

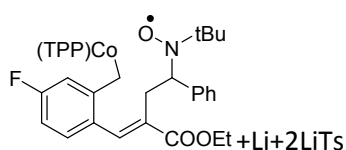

$C_{82}H_{70}CoFLi_3N_5O_7S_2$   
Calcd. mass 1399.4517  
Found 1399.4035

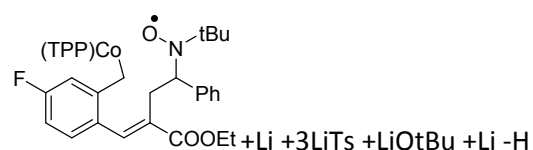

$C_{93}H_{85}CoFLi_6N_5O_{10}S_3$   
Calcd. mass 1647.5744  
Found 1647.5247



Acq. Data Name: CG539\_12 Exp. Title: - Experiment Date/Time: 11/29/2016 2:16:44 PM  
Creation Parameters: Average(MS[1] Time:4.87..4.95) Ionization Mode: ESI+

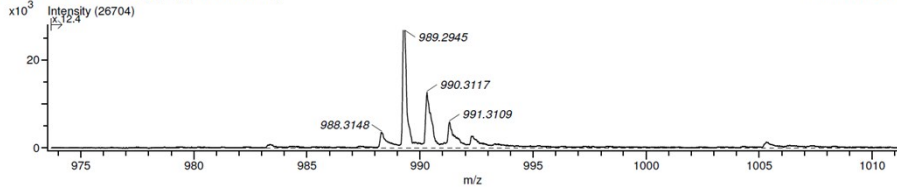

Formula: C64H48Co1F1Li1N4O2  
Mono Isotopic Mass: 989.325324

Addition/Desorption Ion: None  
Charge Number: -

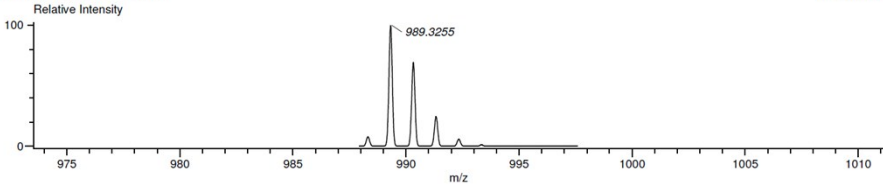

Formula: C71H55Co1F1Li2N4O4S1  
Mono Isotopic Mass: 1151.3580114

Addition/Desorption Ion: None  
Charge Number: -

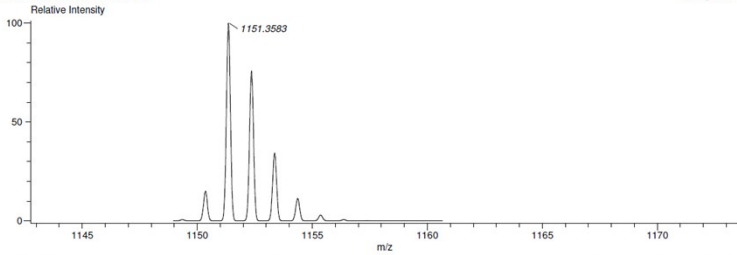

Acq. Data Name: CG539\_15 Exp. Title: - Experiment Date/Time: 11/29/2016 2:57:07 PM  
Creation Parameters: Average(MS[1] Time:4.81..4.99) Ionization Mode: ESI+

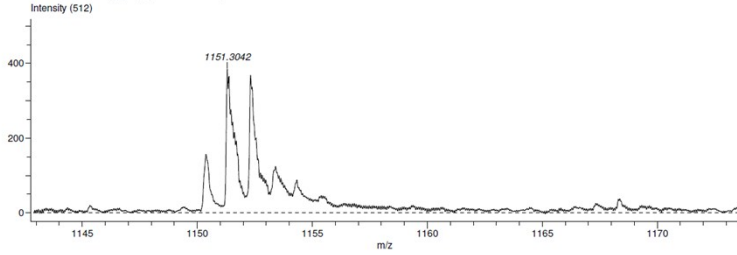

Formula: C75H63Co1F1Li2N5O5S1  
Mono Isotopic Mass: 1237.4186000

Addition/Desorption Ion: None  
Charge Number: -

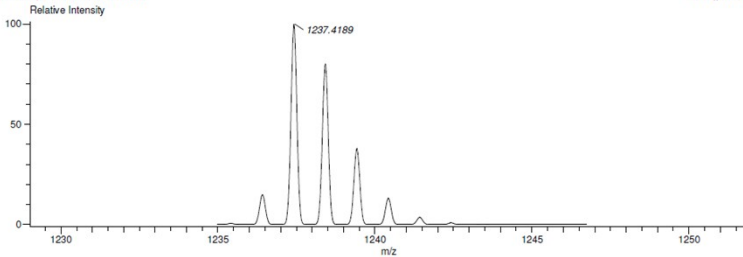

Acq. Data Name: CG539\_15 Exp. Title: - Experiment Date/Time: 11/29/2016 2:57:07 PM  
Creation Parameters: Average(MS[1] Time:4.81..4.99) Ionization Mode: ESI+

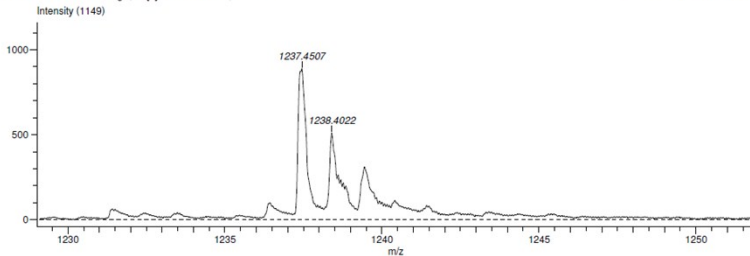

Acq. Data Name: CG539\_15 Exp. Title: - Experiment Date/Time: 11/29/2016 2:57:07 PM  
Creation Parameters: Average[MS1] Time:4.81..4.99 Ionization Mode: ESI+

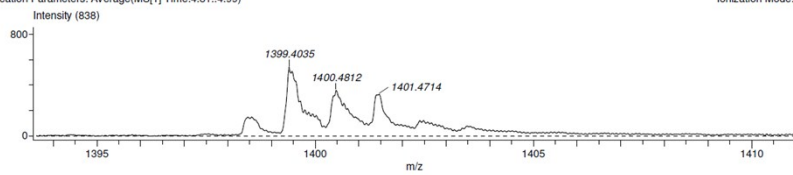

Formula: C82H70Co1F1Li3N5O7S2 Mono Isotopic Mass: 1399.4512790 Addition/Desorption Ion: None Charge Number: -

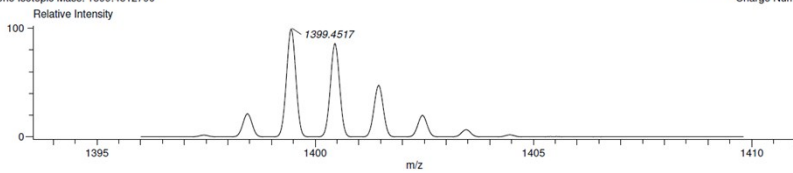

Acq. Data Name: CG539\_15 Exp. Title: - Experiment Date/Time: 11/29/2016 2:57:07 PM  
Creation Parameters: Average[MS1] Time:4.81..4.99 Ionization Mode: ESI+

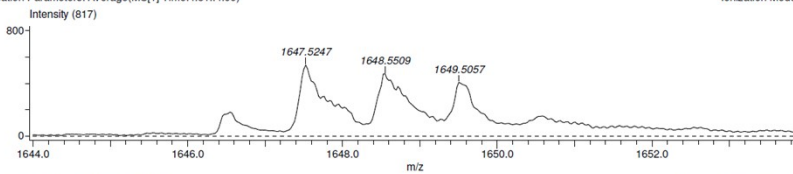

Formula: C93H85Co1F1Li6N5O10S3 Mono Isotopic Mass: 1647.5734808 Addition/Desorption Ion: None Charge Number: -

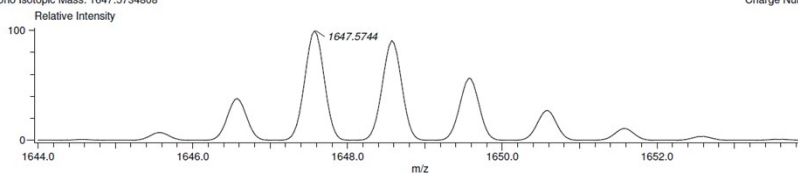

## Radical trapping

Under Schlenk conditions, ethyl (E)-3-(4-fluoro-2-((E)-(2-tosylhydrazono)methyl)phenyl)-2-methylacrylate (1 eq, 0.10 mmol), LiOtBu (1.2 eq, 0.12 mmol), TEMPO (2 eq, 0.20 mmol) and [Co(TPP)] (0.05 eq, 0.005 mmol) were put together after which the tube was evacuated for 15 min. and then refilled with N<sub>2</sub>. Next benzene (2 mL) was added and the mixture was heated to 60 °C over night in a dark fumehood. The mixture was then filtered over a silica plug and eluted with EtOAc. After concentration the product was purified by column chromatography (9:1 hexanes:EtOAc) to yield the product as a red oil (59%).

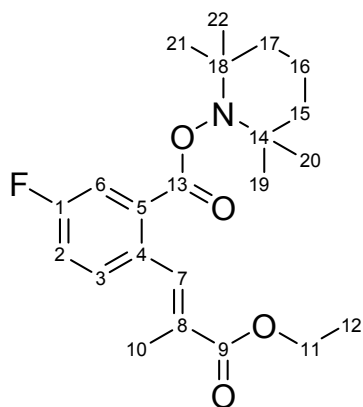

<sup>1</sup>H NMR (300 MHz, CDCl<sub>3</sub>) δ 7.97 (br s, 1H), 7.74 – 7.65 (m, 1H), 7.31 – 7.21 (m, 2H), 4.23 (q, *J* = 7.1 Hz, 2H), 1.90 (d, *J* = 1.6 Hz, 3H, allyl Me), 1.79 – 1.65 (m, 4H, C<sub>15</sub>/C<sub>17</sub>), 1.66 – 1.51 (m, 2H, C<sub>16</sub>), 1.32 (t, *J* = 7.1 Hz, 3H), 1.21 (s, 6H, TEMPO), 1.10 (s, 6H, TEMPO). <sup>13</sup>C NMR (75 MHz, CDCl<sub>3</sub>) δ 168.18 (s, C<sub>9</sub>), 165.85 (d, *J* = 2.7 Hz, C<sub>13</sub>), 161.81 (d, *J* = 248.9 Hz, C<sub>1</sub>), 138.34 (s, C<sub>7</sub>), 133.65 (d, *J* = 3.6 Hz, C<sub>4</sub>), 132.28 (d, *J* = 7.7 Hz, C<sub>3</sub>), 131.27 (d, *J* = 7.2 Hz, C<sub>5</sub>), 129.13 (s, C<sub>8</sub>), 119.04 (d, *J* = 21.3 Hz, C<sub>6</sub>), 117.36 (d, *J* = 23.4 Hz, C<sub>2</sub>), 61.00 (s, C<sub>14</sub>/C<sub>18</sub>), 60.57 (s, C<sub>11</sub>), 39.28 (s, C<sub>15</sub>/C<sub>17</sub>), 32.04 (s, C<sub>19</sub>/C<sub>21</sub>), 21.17 (s, C<sub>20</sub>/C<sub>22</sub>), 17.09 (s, C<sub>16</sub>), 14.40 (s, C<sub>12</sub>), 14.04 (s, C<sub>10</sub>). <sup>19</sup>F NMR (282 MHz, CDCl<sub>3</sub>) δ -112.74 (s). IR (neat) ν 2978, 2933, 1752, 1712, 1489, 1262, 1174, 1112, 1041 cm<sup>-1</sup>. HRMS

(EI<sup>+</sup>) calcd. for C<sub>22</sub>H<sub>30</sub>FNO<sub>4</sub> [M]<sup>+</sup> 391.21589, found 391.21530.

### List of Abbreviations

|         |                                                |
|---------|------------------------------------------------|
| M       | molar                                          |
| EtOAc   | ethyl acetate                                  |
| h       | hour(s)                                        |
| min     | minutes                                        |
| eq      | equivalents                                    |
| N,N-DMF | N,N-dimethylformamide                          |
| NMR     | nuclear magnetic resonance                     |
| IR      | infrared                                       |
| THF     | tetrahydrofuran                                |
| sat.    | saturated                                      |
| br s    | broad singlet                                  |
| MHz     | mega hertz                                     |
| calcd.  | calculated                                     |
| PE      | petroleum ether 40-60°C                        |
| mL      | milliliter                                     |
| DCM     | dichloromethane                                |
| PBN     | N- <i>tert</i> -butyl- $\alpha$ -phenylnitrone |
| TEMPO   | ...                                            |

## Computational details

The mechanism of the [Co(por)]-catalyzed *1,2*-dihydronaphthalene and *E*-aryl-diene formation reactions were explored computationally, using DFT. A simplified model porphyrin without *meso*-substituents was used to reduce computation time. Geometry optimizations were carried out with the Turbomole program package<sup>1</sup> coupled to the PQS Baker optimizer<sup>2</sup> via the BOpt package.<sup>3</sup> We used unrestricted ri-DFT-D3 calculations at the BP86 level,<sup>4</sup> in combination with the def2-TZVP basis set,<sup>5</sup> and a small (m4) grid size. Grimme's dispersion corrections<sup>6</sup> (version 3, disp3, 'zero damping') were used to include Van der Waals interactions. All minima (no imaginary frequencies) and transition states (one imaginary frequency) were characterized by calculating the Hessian matrix. ZPE and gas-phase thermal corrections (entropy and enthalpy, 298 K, 1 bar) from these analyses were calculated. The nature of the transition states was confirmed by following the intrinsic reaction coordinate. The relative free energies ( $\Delta G^\circ_{333\text{K}}$  in kcal mol<sup>-1</sup>) obtained from these calculations are reported in the main text. A separate archive file containing an excel sheet containing the energies and entropies ( $\Delta G_{333\text{K}}$ ,  $\Delta G_{298\text{K}}$ ,  $\Delta H$ ,  $\Delta S$ , SCF+ZPE, SCF) and negative eigenvalues of the transition states and all optimized geometries (.pdb and .xyz format) is provided.

DFT calculations without dispersion corrections strongly underestimate the metal-ligand interactions, as was clear from a series of test calculations. We therefore employed Grimme's version 3 (disp3) dispersion corrections. Used as such, the computed dispersion corrected metal-ligand association/dissociation energies to/from the *non-solvated* [Co(por)] catalyst **A** are overestimated though. This is due to neglected dispersion interactions between the metal binding site of the catalyst and a solvent molecule in solution. We therefore used the Van der Waals  $\pi$ -complex between [Co(por)] catalyst **A** and a discrete toluene solvent molecule (interacting with catalyst at the metal binding site) as the energetic reference point in our calculations to prevent overestimation of the metal-ligand interactions as a result of such uncompensated dispersion forces. However, this approach also leads to an erroneous cancelation of all translational entropy contributions to the computed free energies. This is because the translational entropy contributions to substrate/product association/dissociation are fully counterbalanced by the translational entropy contributions resulting from dissociation/association of the involved solvent molecule in the DFT calculated

thermodynamics ( $\text{A-solv} + \text{L} \xrightarrow{\quad} \text{A-L} + \text{solv}$ ). This is not realistic in comparison to actual solution phase chemistry, for which the translational entropy contributions associated with substrate/product association/dissociation steps can of course not be neglected.<sup>7</sup> Therefore we applied a translational entropy contribution of 20 cal mol<sup>-1</sup> K<sup>-1</sup> to the computed free energies of all substrate/product binding/dissociation steps in the catalytic cycle. See also the excel sheet in the separate archive file.

## Energy Tables

Table S1. Free Energies, Enthalpies and Entropies.

| BP86, def2-TZVP, disp3, m4    |   | $\Delta G_{333K}$ | $\Delta G_{298K}$ | $\Delta H_{298K}$ | $\Delta S$ |
|-------------------------------|---|-------------------|-------------------|-------------------|------------|
|                               |   | kcal/mol          | kcal/mol          | kcal/mol          | cal/mol/K  |
| A                             |   | 1.0               | 2.6               | 16.7              | 47.2       |
| A_toluene_adduct              | - | 0.0               | 0.0               | 0.0               | 0.0        |
| toluene                       |   |                   |                   |                   |            |
| diazo_substrate               |   | 0.0               |                   |                   | 0.0        |
| N2                            |   |                   |                   |                   |            |
| B                             |   | 0.4               | -0.5              | -8.1              | -25.6      |
| TS1                           |   | 10.8              | 9.9               | 2.2               | -26.1      |
| C (+ N2)                      |   | -12.3             | -11.7             | -7.4              | 14.5       |
| C_rotated (+ N2)              |   | -11.2             | -10.7             | -6.8              | 13.1       |
| TS2 (+ N2)                    |   | -6.7              | -6.5              | -4.9              | 5.3        |
| D (+ N2)                      |   | -22.1             | -21.7             | -18.7             | 10.3       |
| TS3 (+ N2)                    |   | -6.9              | -6.6              | -4.5              | 7.1        |
| F + A_toluene_adduct (+ N2)   |   | -60.3             | -59.3             | -50.9             | 28.1       |
|                               |   |                   |                   |                   |            |
| D (+ N2)                      |   | -22.1             | -21.7             | -18.7             | 10.3       |
| E + A_toluene_adduct (+ N2)   |   | -11.1             | -9.8              | 1.2               | 36.9       |
| TS4 + A_toluene_adduct (+ N2) |   | -7.2              | -6.1              | 3.1               | 30.9       |
| F + A_toluene_adduct (+ N2)   |   | -60.3             | -59.3             | -50.9             | 28.1       |
|                               |   |                   |                   |                   |            |
| D'                            |   | 0.0               | 0.0               | 0.0               | 0.0        |
| TS5                           |   | 15.3              | 15.1              | 13.8              | -4.4       |
| TS5' (Me other side)          |   | 15.9              | 15.8              | 15.0              | -2.9       |
| F' + A_toluene_adduct (+ N2)  |   | -36.2             | -35.7             | -30.9             | 16.1       |
|                               |   |                   |                   |                   |            |
| E'                            |   | 7.0               | 7.8               | 14.3              | 21.9       |
| TS8                           |   | 9.0               | 9.6               | 14.5              | 16.6       |
| G                             |   | -14.3             | -13.4             | -5.5              | 26.6       |

| BP86, def2-TZVP, m4, disp3 |       | $\Delta G_{333K}$ | $\Delta G_{298K}$ | $\Delta H_{298K}$ | $\Delta S$ |
|----------------------------|-------|-------------------|-------------------|-------------------|------------|
|                            |       | kcal/mol          | kcal/mol          | kcal/mol          | cal/mol/K  |
| E'                         | trans | 0.0               | 0.0               | 0.0               | 0.0        |
| E''                        | cis   | 2.6               | 2.8               | 4.6               | 6.1        |
| TS8                        |       | 2.0               | 1.8               | 0.3               | -5.3       |
| G                          |       | -21.3             | -21.1             | -19.7             | 4.7        |
|                            |       |                   |                   |                   |            |
|                            |       |                   |                   |                   |            |
|                            |       |                   |                   |                   |            |
| TS6                        | cis   | 7.2               | 9.7               | 9.4               | -1.2       |
| TS7                        | trans | 12.4              | 9.6               | 6.8               | -9.3       |
| F'                         |       | -43.2             | -43.4             | -45.2             | -5.7       |

**Table S2. Free Energy Barriers 333K.**

| BP86, def2-TZVP, disp3, m4, 333 K |   |             | neg. eigenv.  |             | kcal/mol     | barriers    |
|-----------------------------------|---|-------------|---------------|-------------|--------------|-------------|
| A                                 |   | -2371.75642 | -             | -2643.34648 | <b>1.0</b>   |             |
| A_toluene_adduct                  | - | -2643.34805 | -             | -2643.34805 | <b>0.0</b>   |             |
| toluene                           |   | -271.59006  | -             | -2914.93811 |              |             |
| diazo_substrate                   |   | -724.58595  | -             | -3367.934   | <b>0.0</b>   |             |
| N2                                |   | -109.5968   | -             |             |              |             |
| B                                 |   | -3096.35393 | -             | -3367.94399 | <b>0.4</b>   |             |
| TS1                               |   | -3096.33727 | -405.05 cm-1  | -3367.92733 | <b>10.8</b>  | <b>10.8</b> |
| C (+ N2)                          |   | -2986.77731 | -             | -3367.96417 | <b>-12.3</b> |             |
| C_rotated (+ N2)                  |   | -2986.77555 | -             | -3367.96241 | <b>-11.2</b> |             |
| TS2 (+ N2)                        |   | -2986.76845 | -1291.11 cm-1 | -3367.95531 | <b>-6.7</b>  | <b>5.6</b>  |
| D (+ N2)                          |   | -2986.79299 | -             | -3367.97985 | <b>-22.1</b> |             |
| TS3 (+ N2)                        |   | -2986.76874 | -704.62 cm-1  | -3367.9556  | <b>-6.9</b>  | <b>15.2</b> |
| F + A_toluene_adduct (+ N2)       |   | -615.08522  | -             | -3368.03007 | <b>-60.3</b> |             |
|                                   |   |             |               |             |              |             |
| D (+ N2)                          |   | -2986.79299 | -             | -3367.97985 | <b>-22.1</b> |             |
| E + A_toluene_adduct (+ N2)       |   | -615.00678  | -             | -3367.95163 | <b>-11.1</b> |             |
| TS4 + A_toluene_adduct (+ N2)     |   | -615.00067  | -273.84 cm-1  | -3367.94552 | <b>-7.2</b>  | <b>14.9</b> |
| F + A_toluene_adduct (+ N2)       |   | -615.08522  | -             | -3368.03007 | <b>-60.3</b> |             |
|                                   |   |             |               |             |              |             |
| D'                                |   | -3026.10368 | -             | -3407.29054 | <b>0.0</b>   |             |
| TS5                               |   | -3026.0793  | -672.19 cm-1  | -3407.26616 | <b>15.3</b>  | <b>15.3</b> |
| TS5' (Me other side)              |   | -3026.07828 | -704.62 cm-1  | -3407.26514 | <b>15.9</b>  | <b>15.9</b> |
| F' + A_toluene_adduct (+ N2)      |   | -654.39283  | -             | -3407.33768 | <b>-36.2</b> |             |
|                                   |   |             |               |             |              |             |
| E'                                |   | -654.32392  | -             | -3407.26877 | <b>7.0</b>   |             |
| TS8                               |   | -654.32068  | -617.70 cm-1  | -3407.26553 | <b>9.0</b>   | <b>9.0</b>  |
| G                                 |   | -654.35784  | -             | -3407.30269 | <b>-14.3</b> |             |

| BP86, def2-TZVP, m4, disp3, free energies 333 K |       |            |                               |
|-------------------------------------------------|-------|------------|-------------------------------|
|                                                 |       | G          | $\Delta G_{333K}$<br>kcal/mol |
| E'                                              | trans | -654.32392 | <b>0.0</b>                    |
| E''                                             | cis   | -654.31983 | <b>2.6</b>                    |
| TS8                                             |       | -654.32068 | <b>2.0</b>                    |
| G                                               |       | -654.35784 | <b>-21.3</b>                  |
|                                                 |       |            |                               |
|                                                 |       |            |                               |
|                                                 |       |            |                               |
| TS6                                             | cis   | -654.30833 | <b>7.2</b>                    |
| TS7                                             | trans | -654.30408 | <b>12.4</b>                   |
| F'                                              |       | -654.39283 | <b>-43.2</b>                  |

**Table S3. Free Energy Barriers 298K.**

| BP86, def2-TZVP, disp3, m4, 298 K |   |             | neg. eigenv.  |             | kcal/mol     | barriers    |
|-----------------------------------|---|-------------|---------------|-------------|--------------|-------------|
| A                                 |   | -2371.74867 | -             | -2643.3341  | <b>2.6</b>   |             |
| A_toluene_adduct                  | - | -2643.33832 | -             | -2643.33832 | <b>0.0</b>   |             |
| toluene                           |   | -271.58543  | -             | -2914.92375 |              |             |
| diazo_substrate                   |   | -724.57855  | -             | -3367.91687 | <b>0.0</b>   |             |
| N2                                |   | -109.59415  | -             |             |              |             |
| B                                 |   | -3096.34171 | -             | -3367.92714 | <b>-0.5</b>  |             |
| TS1                               |   | -3096.32509 | -405.05 cm-1  | -3367.91052 | <b>9.9</b>   | <b>10.4</b> |
| C (+ N2)                          |   | -2986.76551 | -             | -3367.94509 | <b>-11.7</b> |             |
| C_rotated (+ N2)                  |   | -2986.76383 | -             | -3367.94341 | <b>-10.7</b> |             |
| TS2 (+ N2)                        |   | -2986.75717 | -1291.11 cm-1 | -3367.93675 | <b>-6.5</b>  | <b>5.2</b>  |
| D (+ N2)                          |   | -2986.78143 | -             | -3367.96101 | <b>-21.7</b> |             |
| TS3 (+ N2)                        |   | -2986.75735 | -704.62 cm-1  | -3367.93693 | <b>-6.6</b>  | <b>15.1</b> |
| F + A_toluene_adduct (+ N2)       |   | -615.07892  | -             | -3368.01139 | <b>-59.3</b> |             |
|                                   |   |             |               |             |              |             |
| D (+ N2)                          |   | -2986.78143 | -             | -3367.96101 | <b>-21.7</b> |             |
| E + A_toluene_adduct (+ N2)       |   | -614.99997  | -             | -3367.93244 | <b>-9.8</b>  |             |
| TS4 + A_toluene_adduct (+ N2)     |   | -614.9942   | -273.84 cm-1  | -3367.92667 | <b>-6.1</b>  | <b>15.6</b> |
| F + A_toluene_adduct (+ N2)       |   | -615.07892  | -             | -3368.01139 | <b>-59.3</b> |             |
|                                   |   |             |               |             |              |             |
| D'                                |   | -3026.09166 | -             | -3407.27124 | <b>0.0</b>   |             |
| TS5                               |   | -3026.06753 | -672.19 cm-1  | -3407.24711 | <b>15.1</b>  | <b>15.1</b> |
| TS5' (Me other side)              |   | -3026.06642 | -704.62 cm-1  | -3407.246   | <b>15.8</b>  | <b>15.8</b> |
| F' + A_toluene_adduct (+ N2)      |   | -654.38616  | -             | -3407.31863 | <b>-35.7</b> |             |
|                                   |   |             |               |             |              |             |
| E'                                |   | -654.31692  | -             | -3407.24939 | <b>7.8</b>   |             |
| TS8                               |   | -654.31399  | -617.70 cm-1  | -3407.24646 | <b>9.6</b>   | <b>9.6</b>  |
| G                                 |   | -654.35058  | -             | -3407.28305 | <b>-13.4</b> |             |

| BP86, def2-TZVP, m4, disp3, free energies 298 K |       |            |                               |
|-------------------------------------------------|-------|------------|-------------------------------|
|                                                 |       | G          | $\Delta G_{298K}$<br>kcal/mol |
| E'                                              | trans | -654.31692 | <b>0.0</b>                    |
| E''                                             | cis   | -654.31249 | <b>2.8</b>                    |
| TS8                                             |       | -654.31399 | <b>1.8</b>                    |
| G                                               |       | -654.35058 | <b>-21.1</b>                  |
|                                                 |       |            |                               |
|                                                 |       |            |                               |
|                                                 |       |            |                               |
| TS6                                             | cis   | -654.30141 | <b>7.0</b>                    |
| TS7                                             | trans | -654.29726 | <b>12.3</b>                   |
| F'                                              |       | -654.38616 | <b>-43.4</b>                  |



**Table S4. Enthalpy Barriers 298K.**

| BP86, def2-TZVP, disp3, m4    |   | H_298       |             | SCF         | ZPE_corr | H_corr  | kcal/mol     | barriers    |
|-------------------------------|---|-------------|-------------|-------------|----------|---------|--------------|-------------|
| A                             |   | -2371.68485 | -2643.23157 | -2371.97065 | 0.26715  | 0.2858  | <b>16.7</b>  |             |
| A_toluene_adduct              | - | -2643.25822 | -2643.25822 | -2643.67769 | 0.39317  | 0.41947 | <b>0.0</b>   |             |
| toluene                       |   | -271.54672  | -2914.80494 | -271.67806  | 0.12398  | 0.13134 |              |             |
| diazo_substrate               |   | -724.5172   | -3367.77542 | -724.74601  | 0.21199  | 0.22881 | <b>0.0</b>   |             |
| N2                            |   | -109.57176  |             | -109.58042  | 0.00535  | 0.00866 |              |             |
| B                             |   | -3096.24162 | -3367.78834 | -3096.75714 | 0.47994  | 0.51552 | <b>-8.1</b>  |             |
| TS1                           |   | -3096.22524 | -3367.77196 | -3096.73979 | 0.47918  | 0.51455 | <b>2.2</b>   | <b>10.3</b> |
| C (+ N2)                      |   | -2986.66876 | -3367.78724 | -2987.17331 | 0.4711   | 0.50455 | <b>-7.4</b>  |             |
| C_rotated (+ N2)              |   | -2986.66774 | -3367.78622 | -2987.17146 | 0.4703   | 0.50372 | <b>-6.8</b>  |             |
| TS2 (+ N2)                    |   | -2986.6648  | -3367.78328 | -2987.16368 | 0.46666  | 0.49888 | <b>-4.9</b>  | <b>2.5</b>  |
| D (+ N2)                      |   | -2986.68667 | -3367.80515 | -2987.19086 | 0.47119  | 0.50419 | <b>-18.7</b> |             |
| TS3 (+ N2)                    |   | -2986.66411 | -3367.78259 | -2987.16682 | 0.47018  | 0.50271 | <b>-4.5</b>  | <b>14.2</b> |
| F + A_toluene_adduct (+ N2)   |   | -615.0266   | -3367.85658 | -615.24626  | 0.2064   | 0.21966 | <b>-50.9</b> |             |
|                               |   |             |             |             |          |         |              |             |
| D (+ N2)                      |   | -2986.68667 | -3367.80515 | -2987.19086 | 0.47119  | 0.50419 | <b>-18.7</b> |             |
| E + A_toluene_adduct (+ N2)   |   | -614.94347  | -3367.77345 | -615.16006  | 0.202    | 0.21659 | <b>1.2</b>   |             |
| TS4 + A_toluene_adduct (+ N2) |   | -614.94056  | -3367.77054 | -615.15628  | 0.20204  | 0.21572 | <b>3.1</b>   | <b>21.7</b> |
| F + A_toluene_adduct (+ N2)   |   | -615.0266   | -3367.85658 | -615.24626  | 0.2064   | 0.21966 | <b>-50.9</b> |             |
|                               |   |             |             |             |          |         |              |             |
| D'                            |   | -3025.9932  | -3407.11168 | -3026.52627 | 0.49841  | 0.53307 | <b>0.0</b>   |             |
| TS5                           |   | -3025.97116 | -3407.08964 | -3026.50277 | 0.49758  | 0.53161 | <b>13.8</b>  | <b>13.8</b> |
| TS5' (Me other side)          |   | -3025.96935 | -3407.08783 | -3026.50088 | 0.49728  | 0.53153 | <b>15.0</b>  | <b>15.0</b> |
| F' + A_toluene_adduct (+ N2)  |   | -654.33039  | -3407.16091 | -654.57937  | 0.23374  | 0.24844 | <b>-30.9</b> |             |
|                               |   |             |             |             |          |         |              |             |
| E'                            |   | -654.25896  | -3407.08894 | -654.50408  | 0.22932  | 0.24512 | <b>14.3</b>  |             |
| TS8                           |   | -654.25855  | -3407.08853 | -654.50009  | 0.22687  | 0.24154 | <b>14.5</b>  | <b>14.5</b> |
| G                             |   | -654.29039  | -3407.12037 | -654.53665  | 0.22994  | 0.24626 | <b>-5.5</b>  |             |

| BP86, def2-TZVP, m4, disp3 |       |           |            |         |         |              |
|----------------------------|-------|-----------|------------|---------|---------|--------------|
|                            |       | H         | SCF        | ZPE_cor | H_corr  | kcal/mol     |
| E'                         | trans | -654.259  | -654.50408 | 0.22932 | 0.24512 | <b>0.0</b>   |
| E''                        | cis   | -654.2516 | -654.4967  | 0.22864 | 0.24508 | <b>4.6</b>   |
| TS8                        |       | -654.2586 | -654.50009 | 0.22687 | 0.24154 | <b>0.3</b>   |
| G                          |       | -654.2904 | -654.53665 | 0.22994 | 0.24626 | <b>-19.7</b> |
|                            |       |           |            |         |         |              |
|                            |       |           |            |         |         |              |
|                            |       |           |            |         |         |              |
| TS6                        | cis   | -654.244  | -654.4885  | 0.22919 | 0.24447 | <b>9.4</b>   |
| TS7                        | trans | -654.2408 | -654.48507 | 0.22918 | 0.24428 | <b>6.8</b>   |
| F'                         |       | -654.3309 | -654.57937 | 0.23374 | 0.24844 | <b>-45.2</b> |

**Table S5. SCF+ZPE Barriers.**

| BP86, def2-TZVP, disp3, m4    |   | SCF+ZPE     |             | SCF         | ZPE_corr | H_corr  | kcal/mol     | barriers    |
|-------------------------------|---|-------------|-------------|-------------|----------|---------|--------------|-------------|
| A                             |   | -2371.7035  | -2643.25758 | -2371.97065 | 0.26715  | 0.2858  | <b>16.9</b>  |             |
| A_toluene_adduct              | - | -2643.28452 | -2643.28452 | -2643.67769 | 0.39317  | 0.41947 | <b>0.0</b>   |             |
| toluene                       |   | -271.55408  | -2914.8386  | -271.67806  | 0.12398  | 0.13134 |              |             |
| diazo_substrate               |   | -724.53402  | -3367.81854 | -724.74601  | 0.21199  | 0.22881 | <b>0.0</b>   |             |
| N2                            |   | -109.57507  |             | -109.58042  | 0.00535  | 0.00866 |              |             |
| B                             |   | -3096.2772  | -3367.83128 | -3096.75714 | 0.47994  | 0.51552 | <b>-8.0</b>  |             |
| TS1                           |   | -3096.26061 | -3367.81469 | -3096.73979 | 0.47918  | 0.51455 | <b>2.4</b>   | <b>10.4</b> |
| C (+ N2)                      |   | -2986.70221 | -3367.83136 | -2987.17331 | 0.4711   | 0.50455 | <b>-8.0</b>  |             |
| C_rotated (+ N2)              |   | -2986.70116 | -3367.83031 | -2987.17146 | 0.4703   | 0.50372 | <b>-7.4</b>  |             |
| TS2 (+ N2)                    |   | -2986.69702 | -3367.82617 | -2987.16368 | 0.46666  | 0.49888 | <b>-4.8</b>  | <b>3.3</b>  |
| D (+ N2)                      |   | -2986.71967 | -3367.84882 | -2987.19086 | 0.47119  | 0.50419 | <b>-19.0</b> |             |
| TS3 (+ N2)                    |   | -2986.69664 | -3367.82579 | -2987.16682 | 0.47018  | 0.50271 | <b>-4.5</b>  | <b>14.5</b> |
| F + A_toluene_adduct (+ N2)   |   | -615.03986  | -3367.89945 | -615.24626  | 0.2064   | 0.21966 | <b>-50.8</b> |             |
| D (+ N2)                      |   | -2986.71967 | -3367.84882 | -2987.19086 | 0.47119  | 0.50419 | <b>-19.0</b> |             |
| E + A_toluene_adduct (+ N2)   |   | -614.95806  | -3367.81765 | -615.16006  | 0.202    | 0.21659 | <b>0.6</b>   |             |
| TS4 + A_toluene_adduct (+ N2) |   | -614.95424  | -3367.81383 | -615.15628  | 0.20204  | 0.21572 | <b>3.0</b>   | <b>22.0</b> |
| F + A_toluene_adduct (+ N2)   |   | -615.03986  | -3367.89945 | -615.24626  | 0.2064   | 0.21966 | <b>-50.8</b> |             |
| D'                            |   | -3026.02786 | -3407.15701 | -3026.52627 | 0.49841  | 0.53307 | <b>0.0</b>   |             |
| TS5                           |   | -3026.00519 | -3407.13434 | -3026.50277 | 0.49758  | 0.53161 | <b>14.2</b>  | <b>14.2</b> |
| TS5' (Me other side)          |   | -3026.0036  | -3407.13275 | -3026.50088 | 0.49728  | 0.53153 | <b>15.2</b>  | <b>15.2</b> |
| F' + A_toluene_adduct (+ N2)  |   | -654.34563  | -3407.20522 | -654.57937  | 0.23374  | 0.24844 | <b>-30.3</b> |             |
| E'                            |   | -654.27476  | -3407.13435 | -654.50408  | 0.22932  | 0.24512 | <b>14.2</b>  |             |
| TS8                           |   | -654.27322  | -3407.13281 | -654.50009  | 0.22687  | 0.24154 | <b>15.2</b>  | <b>15.2</b> |
| G                             |   | -654.30671  | -3407.1663  | -654.53665  | 0.22994  | 0.24626 | <b>-5.8</b>  |             |

| BP86, def2-TZVP, m4, disp3 |       |           |            |         |         |              |
|----------------------------|-------|-----------|------------|---------|---------|--------------|
|                            |       | SCF+ZPE   | SCF        | ZPE_cor | H_corr  | kcal/mol     |
| E'                         | trans | -654.2748 | -654.50408 | 0.22932 | 0.24512 | <b>0.0</b>   |
| E''                        | cis   | -654.2681 | -654.4967  | 0.22864 | 0.24508 | <b>4.2</b>   |
| TS8                        |       | -654.2732 | -654.50009 | 0.22687 | 0.24154 | <b>1.0</b>   |
| G                          |       | -654.3067 | -654.53665 | 0.22994 | 0.24626 | <b>-20.0</b> |
| TS6                        | cis   | -654.2593 | -654.4885  | 0.22919 | 0.24447 | <b>9.7</b>   |
| TS7                        | trans | -654.2559 | -654.48507 | 0.22918 | 0.24428 | <b>7.6</b>   |
| F'                         |       | -654.3456 | -654.57937 | 0.23374 | 0.24844 | <b>-44.5</b> |

**Table S6. SCF Barriers.**

| BP86, def2-TZVP, disp3, m4    |   | SCF         |             | SCF         | ZPE_corr | H_corr  | kcal/mol     | barriers    |
|-------------------------------|---|-------------|-------------|-------------|----------|---------|--------------|-------------|
| A                             |   | -2371.97065 | -2643.64871 | -2371.97065 | 0.26715  | 0.2858  | <b>18.2</b>  |             |
| A_toluene_adduct              | - | -2643.67769 | -2643.67769 | -2643.67769 | 0.39317  | 0.41947 | <b>0.0</b>   |             |
| toluene                       |   | -271.67806  | -2915.35575 | -271.67806  | 0.12398  | 0.13134 |              |             |
| diazo_substrate               |   | -724.74601  | -3368.4237  | -724.74601  | 0.21199  | 0.22881 | <b>0.0</b>   |             |
| N2                            |   | -109.58042  |             | -109.58042  | 0.00535  | 0.00866 |              |             |
| B                             |   | -3096.75714 | -3368.4352  | -3096.75714 | 0.47994  | 0.51552 | <b>-7.2</b>  |             |
| TS1                           |   | -3096.73979 | -3368.41785 | -3096.73979 | 0.47918  | 0.51455 | <b>3.7</b>   | <b>10.9</b> |
| C (+ N2)                      |   | -2987.17331 | -3368.43179 | -2987.17331 | 0.4711   | 0.50455 | <b>-5.1</b>  |             |
| C_rotated (+ N2)              |   | -2987.17146 | -3368.42994 | -2987.17146 | 0.4703   | 0.50372 | <b>-3.9</b>  |             |
| TS2 (+ N2)                    |   | -2987.16368 | -3368.42216 | -2987.16368 | 0.46666  | 0.49888 | <b>1.0</b>   | <b>6.0</b>  |
| D (+ N2)                      |   | -2987.19086 | -3368.44934 | -2987.19086 | 0.47119  | 0.50419 | <b>-16.1</b> |             |
| TS3 (+ N2)                    |   | -2987.16682 | -3368.4253  | -2987.16682 | 0.47018  | 0.50271 | <b>-1.0</b>  | <b>15.1</b> |
| F + A_toluene_adduct (+ N2)   |   | -615.24626  | -3368.50437 | -615.24626  | 0.2064   | 0.21966 | <b>-50.6</b> |             |
| D (+ N2)                      |   | -2987.19086 | -3368.44934 | -2987.19086 | 0.47119  | 0.50419 | <b>-16.1</b> |             |
| E + A_toluene_adduct (+ N2)   |   | -615.16006  | -3368.41817 | -615.16006  | 0.202    | 0.21659 | <b>3.5</b>   |             |
| TS4 + A_toluene_adduct (+ N2) |   | -615.15628  | -3368.41439 | -615.15628  | 0.20204  | 0.21572 | <b>5.8</b>   | <b>21.9</b> |
| F + A_toluene_adduct (+ N2)   |   | -615.24626  | -3368.50437 | -615.24626  | 0.2064   | 0.21966 | <b>-50.6</b> |             |
| D'                            |   | -3026.52627 | -3407.78475 | -3026.52627 | 0.49841  | 0.53307 | <b>0.0</b>   |             |
| TS5                           |   | -3026.50277 | -3407.76125 | -3026.50277 | 0.49758  | 0.53161 | <b>14.7</b>  | <b>14.7</b> |
| TS5' (Me other side)          |   | -3026.50088 | -3407.75936 | -3026.50088 | 0.49728  | 0.53153 | <b>15.9</b>  | <b>15.9</b> |
| F' + A_toluene_adduct (+ N2)  |   | -654.57937  | -3407.83748 | -654.57937  | 0.23374  | 0.24844 | <b>-33.1</b> |             |
| E'                            |   | -654.50408  | -3407.76219 | -654.50408  | 0.22932  | 0.24512 | <b>14.2</b>  |             |
| TS8                           |   | -654.50009  | -3407.7582  | -654.50009  | 0.22687  | 0.24154 | <b>16.7</b>  | <b>16.7</b> |
| G                             |   | -654.53665  | -3407.79476 | -654.53665  | 0.22994  | 0.24626 | <b>-6.3</b>  |             |

| BP86, def2-TZVP, m4, disp3 |       |           |           |         |         |              |
|----------------------------|-------|-----------|-----------|---------|---------|--------------|
|                            |       | SCF       | SCF       | ZPE_cor | H_corr  | kcal/mol     |
| E'                         | trans | -654.5041 | -654.5041 | 0.22932 | 0.24512 | <b>0.0</b>   |
| E''                        | cis   | -654.4967 | -654.4967 | 0.22864 | 0.24508 | <b>4.6</b>   |
| TS8                        |       | -654.5001 | -654.5001 | 0.22687 | 0.24154 | <b>2.5</b>   |
| G                          |       | -654.5367 | -654.5367 | 0.22994 | 0.24626 | <b>-20.4</b> |
| TS6                        | cis   | -654.4885 | -654.4885 | 0.22919 | 0.24447 | <b>9.8</b>   |
| TS7                        | trans | -654.4851 | -654.4851 | 0.22918 | 0.24428 | <b>7.3</b>   |
| F'                         |       | -654.5794 | -654.5794 | 0.23374 | 0.24844 | <b>-47.2</b> |

## Optimized Geometries

### **N<sub>2</sub>**

2

N2

|   |           |           |            |
|---|-----------|-----------|------------|
| N | 0.0000000 | 0.0000000 | 0.9863040  |
| N | 0.0000000 | 0.0000000 | -0.1163040 |

### **toluene**

15

toluene

|   |            |            |            |
|---|------------|------------|------------|
| C | -0.0178842 | 0.0000899  | 1.0525150  |
| C | 0.0132356  | -0.0000101 | 3.8750033  |
| C | -0.0119504 | -1.2033840 | 1.7734632  |
| C | -0.0120285 | 1.2035135  | 1.7735456  |
| C | 0.0041801  | 1.2066012  | 3.1703468  |
| C | 0.0042753  | -1.2065729 | 3.1702562  |
| H | -0.0226446 | -2.1515267 | 1.2308571  |
| H | -0.0227564 | 2.1516923  | 1.2310052  |
| H | 0.0055441  | 2.1550015  | 3.7100966  |
| H | 0.0056993  | -2.1550132 | 3.7099346  |
| H | 0.0226728  | -0.0000515 | 4.9657486  |
| C | -0.0009101 | 0.0000885  | -0.4557340 |
| H | 1.0331991  | -0.0005296 | -0.8360819 |
| H | -0.4991930 | 0.8899279  | -0.8646515 |
| H | -0.4994391 | -0.8898268 | -0.8643049 |

### **diazo substrate**

28

diazo substrate

|   |           |            |            |
|---|-----------|------------|------------|
| C | 3.351737  | -0.4791113 | -1.543548  |
| H | 3.2120787 | 0.5867124  | -1.7084272 |
| C | 4.1545404 | -1.0284046 | -0.4643852 |
| C | 5.6613673 | -2.0529556 | 1.6903527  |
| C | 4.9575463 | -0.1508181 | 0.3231891  |
| C | 4.1328119 | -2.4028995 | -0.1514086 |
| C | 4.8759788 | -2.9087158 | 0.9095317  |
| C | 5.6932761 | -0.693127  | 1.3931731  |
| H | 3.5146202 | -3.0818146 | -0.7415811 |
| H | 4.8420649 | -3.9765608 | 1.1291948  |
| H | 6.3364809 | -0.029088  | 1.9705571  |
| H | 6.2545896 | -2.4462979 | 2.5160354  |
| C | 5.0705247 | 1.2650562  | -0.0335595 |
| H | 5.1694123 | 1.4776527  | -1.1013976 |
| C | 5.0737109 | 2.3331635  | 0.8022436  |
| C | 5.2708401 | 3.7090704  | 0.2614203  |
| O | 5.2808658 | 4.71392    | 0.955461   |
| O | 5.44204   | 3.7504544  | -1.0933374 |
| C | 5.6347338 | 5.0737431  | -1.6351047 |

|   |           |            |            |
|---|-----------|------------|------------|
| H | 6.5323321 | 5.5404479  | -1.2066399 |
| H | 4.7675435 | 5.7123307  | -1.4175175 |
| H | 5.7505744 | 4.9325751  | -2.7147445 |
| C | 4.859067  | 2.2792191  | 2.2889371  |
| H | 4.4176209 | 1.3237676  | 2.595855   |
| H | 4.2065966 | 3.1046563  | 2.6025689  |
| H | 5.8064819 | 2.4146506  | 2.8336189  |
| N | 2.6881173 | -1.2529323 | -2.3605285 |
| N | 2.1164486 | -1.954694  | -3.061959  |

**A**

37

|    |            |            |            |
|----|------------|------------|------------|
| A  |            |            |            |
| C  | 0.1929408  | 2.1101905  | -2.370403  |
| N  | 0.1213381  | 0.7726809  | -2.0183592 |
| H  | 0.0853592  | 3.2300402  | -4.3085728 |
| C  | -0.0552166 | 0.1012487  | -3.216715  |
| C  | -0.0949132 | 1.0251479  | -4.3206291 |
| H  | -0.2253955 | 0.7350583  | -5.3596115 |
| C  | 0.060763   | 2.2727771  | -3.7951195 |
| C  | -0.1722191 | -1.2702096 | -3.3555359 |
| N  | 0.0456697  | -1.8218461 | -0.9687307 |
| C  | 0.0423494  | -3.0298464 | -0.2913395 |
| C  | -0.1249767 | -4.1296108 | -1.2057963 |
| H  | -0.1586544 | -5.1745631 | -0.9097897 |
| C  | -0.2283351 | -3.5914539 | -2.4534547 |
| H  | -0.3643648 | -4.0983925 | -3.4048628 |
| C  | -0.1203876 | -2.1636678 | -2.3005481 |
| C  | 0.3607739  | 3.162047   | -1.4875924 |
| H  | 0.8134221  | 4.0865377  | 3.0031898  |
| C  | 0.6962774  | 3.5783121  | 2.0499592  |
| C  | 0.5781543  | 2.1512292  | 1.8980046  |
| H  | 0.6856144  | 5.1573829  | 0.5006256  |
| N  | 0.4408737  | 1.8074398  | 0.5634262  |
| C  | 0.4731197  | 3.0134567  | -0.116738  |
| C  | 0.6326431  | 4.1137544  | 0.7984742  |
| C  | 0.1730136  | -3.1796847 | 1.0777564  |
| H  | 0.6646232  | -0.746204  | 4.9588588  |
| C  | 0.5551934  | -1.037746  | 3.9178469  |
| C  | 0.4388972  | -2.2880711 | 3.3885687  |
| H  | 0.4313406  | -3.2464955 | 3.9003985  |
| C  | 0.3189002  | -2.1263265 | 1.962665   |
| N  | 0.3629251  | -0.7869366 | 1.6132613  |
| C  | 0.5090286  | -0.1134174 | 2.8145427  |
| C  | 0.6069298  | 1.2593478  | 2.9552027  |
| Co | 0.2429206  | -0.0071919 | -0.202618  |
| H  | -0.3076814 | -1.6723126 | -4.3592768 |
| H  | 0.1543007  | -4.1902817 | 1.4850589  |
| H  | 0.7199912  | 1.662987   | 3.9611026  |
| H  | 0.4017068  | 4.1711246  | -1.8970273 |

## A\_toluene\_adduct

52

| A_toluene_adduct |            |            |             |
|------------------|------------|------------|-------------|
| C                | -0.0531934 | 1.9825549  | -7.3725669  |
| N                | 1.3256104  | 2.0060141  | -7.4730912  |
| H                | -1.4955989 | 1.5844665  | -5.7018828  |
| C                | 1.7816146  | 1.7011128  | -6.2039420  |
| C                | 0.6780587  | 1.4690000  | -5.3066927  |
| H                | 0.7835762  | 1.2106873  | -4.2564721  |
| C                | -0.4620421 | 1.6597561  | -6.0287658  |
| C                | 3.1100341  | 1.6726922  | -5.8180951  |
| N                | 4.0466078  | 2.3459562  | -7.9874259  |
| C                | 5.3316487  | 2.6657590  | -8.3892875  |
| C                | 6.2555968  | 2.5397924  | -7.2911523  |
| H                | 7.3211529  | 2.7417859  | -7.3578298  |
| C                | 5.5331481  | 2.1119967  | -6.2163960  |
| H                | 5.8761166  | 1.8999129  | -5.2073011  |
| C                | 4.1631078  | 2.0098931  | -6.6502342  |
| C                | -0.9343952 | 2.1825964  | -8.4204419  |
| H                | -1.0322050 | 2.4686602  | -13.0172012 |
| C                | -0.7050847 | 2.4392146  | -11.9813468 |
| C                | 0.6727967  | 2.4635814  | -11.5596811 |
| H                | -2.5443757 | 2.3678957  | -10.7536354 |
| N                | 0.7631651  | 2.4223402  | -10.1804674 |
| C                | -0.5451011 | 2.3599822  | -9.7368754  |
| C                | -1.4621667 | 2.3935776  | -10.8480534 |
| C                | 5.7110440  | 2.9713028  | -9.6850604  |
| H                | 4.0794413  | 2.9785972  | -13.9967528 |
| C                | 4.1658482  | 2.9272650  | -12.9148144 |
| C                | 5.2720060  | 3.1058170  | -12.1378391 |
| H                | 6.2908507  | 3.3254038  | -12.4453577 |
| C                | 4.8524514  | 2.9341229  | -10.7702852 |
| N                | 3.4948111  | 2.6704475  | -10.7037354 |
| C                | 3.0645360  | 2.6789622  | -12.0196175 |
| C                | 1.7483772  | 2.5451897  | -12.4282024 |
| Co               | 2.4082656  | 2.3111520  | -9.0928608  |
| H                | 6.7612787  | 3.1945783  | -9.8712972  |
| H                | -2.0018505 | 2.1379687  | -8.2054129  |
| H                | 3.3371630  | 1.4159088  | -4.7836398  |
| H                | 1.5412093  | 2.5625600  | -13.4979984 |
| C                | 3.2621965  | -0.6805074 | -8.9634035  |
| C                | 0.5149536  | -1.1160448 | -8.4741838  |
| C                | 2.2972343  | -0.3925972 | -9.9452169  |
| C                | 2.8182320  | -1.1663738 | -7.7235770  |
| C                | 1.4621175  | -1.3772958 | -7.4780534  |
| C                | 0.9358309  | -0.6273121 | -9.7083874  |
| H                | 2.6182588  | -0.0096586 | -10.9154787 |
| H                | 3.5496643  | -1.3633839 | -6.9374860  |
| H                | 1.1377655  | -1.7308208 | -6.4984021  |
| H                | 0.2071217  | -0.3866977 | -10.4830666 |
| H                | -0.5462181 | -1.2688669 | -8.2767131  |
| C                | 4.7302014  | -0.5154138 | -9.2489672  |
| H                | 5.2777249  | -0.1911490 | -8.3535099  |
| H                | 4.9005316  | 0.2269876  | -10.0388908 |
| H                | 5.1678815  | -1.4703703 | -9.5809514  |

**B**

65

B

|   |            |            |            |
|---|------------|------------|------------|
| C | 3.3838271  | -0.4607584 | -1.607895  |
| H | 3.442042   | 0.5883158  | -1.895637  |
| C | 4.1152625  | -0.9971466 | -0.4498087 |
| C | 5.3972108  | -2.058709  | 1.8145138  |
| C | 4.8714527  | -0.1322903 | 0.3942829  |
| C | 4.0101555  | -2.3624027 | -0.1347857 |
| C | 4.635092   | -2.8904631 | 0.9875776  |
| C | 5.5097836  | -0.7058867 | 1.515037   |
| H | 3.3882378  | -3.0080241 | -0.7563908 |
| H | 4.5210528  | -3.9492153 | 1.2215792  |
| H | 6.1444258  | -0.0781188 | 2.1360134  |
| H | 5.9082555  | -2.4668677 | 2.6868638  |
| C | 5.0157171  | 1.2765561  | 0.0504073  |
| H | 4.923699   | 1.5109705  | -1.0103368 |
| C | 5.2303198  | 2.346831   | 0.8585869  |
| C | 5.3306398  | 3.704991   | 0.2550815  |
| O | 5.4775964  | 4.7341725  | 0.8977154  |
| O | 5.2280192  | 3.708661   | -1.1088742 |
| C | 5.2430076  | 5.0150345  | -1.7107285 |
| H | 6.1833917  | 5.5384056  | -1.4900088 |
| H | 4.4080882  | 5.6238816  | -1.3348672 |
| H | 5.1389439  | 4.8421404  | -2.7870364 |
| C | 1.2946186  | 2.2622427  | -2.8745117 |
| N | 0.8727346  | 0.9635772  | -2.6433307 |
| H | 1.3162125  | 3.6043577  | -4.6714309 |
| C | 0.3692738  | 0.5297382  | -3.8577273 |
| C | 0.4809672  | 1.5637953  | -4.8546087 |
| H | 0.1470829  | 1.4642904  | -5.8838967 |
| C | 1.0713448  | 2.6336676  | -4.2486939 |
| C | -0.143731  | -0.7330578 | -4.1011727 |
| N | 0.3255685  | -1.6707759 | -1.8755577 |
| C | 0.2068811  | -2.9518719 | -1.3644573 |
| C | -0.3503166 | -3.8453269 | -2.3483171 |
| H | -0.5420148 | -4.9017423 | -2.1809334 |
| C | -0.5865337 | -3.1020098 | -3.4659587 |
| H | -1.0034447 | -3.4186553 | -4.4180505 |
| C | -0.1507898 | -1.7604854 | -3.173313  |
| C | 1.7799025  | 3.1252318  | -1.9052847 |
| H | 2.3763842  | 3.4637612  | 2.6513373  |
| C | 2.1660633  | 3.0895041  | 1.653932   |
| C | 1.8327971  | 1.7228838  | 1.346987   |
| H | 2.4465199  | 4.8064349  | 0.2936797  |
| N | 1.6152794  | 1.5657096  | -0.0117844 |
| C | 1.8614008  | 2.8138543  | -0.5586858 |
| C | 2.2017821  | 3.7629148  | 0.4692606  |
| C | 0.5385514  | -3.3298076 | -0.0743207 |
| H | 1.8693568  | -1.5776103 | 3.9753562  |
| C | 1.5993551  | -1.6991636 | 2.9299927  |
| C | 1.2466256  | -2.8355728 | 2.2658846  |
| H | 1.1629223  | -3.8491507 | 2.6483442  |
| C | 0.9741138  | -2.4527118 | 0.9038652  |
| N | 1.1741311  | -1.0956835 | 0.7256812  |

|                |            |            |            |
|----------------|------------|------------|------------|
| C              | 1.5499009  | -0.6244613 | 1.9713592  |
| C              | 1.8234441  | 0.6978063  | 2.2760216  |
| C <sub>o</sub> | 1.067874   | -0.0778881 | -0.965104  |
| C              | 5.3169496  | 2.3228073  | 2.3584507  |
| H              | 4.6976413  | 1.5176998  | 2.7740989  |
| H              | 4.9867376  | 3.2861181  | 2.7637654  |
| H              | 6.3531701  | 2.1727185  | 2.7020295  |
| H              | -0.5264138 | -0.9451349 | -5.0992191 |
| H              | 2.0552221  | 4.1343231  | -2.2109837 |
| H              | 2.064804   | 0.944203   | 3.3098168  |
| H              | 0.4107847  | -4.3770512 | 0.1992639  |
| N              | 3.2145906  | -1.2628366 | -2.6543991 |
| N              | 2.9756203  | -1.9878189 | -3.4971085 |

**C**

63

|   |            |            |            |
|---|------------|------------|------------|
| C | 2.92366    | -0.2700938 | -1.2513499 |
| H | 3.2774165  | 0.6265193  | -1.7730289 |
| C | 3.8341769  | -0.9467375 | -0.3731108 |
| C | 5.6048195  | -2.3440298 | 1.3371675  |
| C | 4.9176562  | -0.2558634 | 0.2715772  |
| C | 3.666283   | -2.3258795 | -0.1020533 |
| C | 4.5296465  | -3.015226  | 0.7364243  |
| C | 5.7875741  | -0.9828158 | 1.1042231  |
| H | 2.8341016  | -2.8384341 | -0.5831262 |
| H | 4.3766267  | -4.079878  | 0.9187712  |
| H | 6.6337065  | -0.4670466 | 1.5591392  |
| H | 6.3002208  | -2.8834191 | 1.9815708  |
| C | 5.0799171  | 1.1830559  | 0.0697994  |
| H | 4.8968046  | 1.5531093  | -0.939836  |
| C | 5.3526802  | 2.119531   | 1.0120542  |
| C | 5.4189702  | 3.5564573  | 0.6303296  |
| O | 5.5100297  | 4.4742448  | 1.4331948  |
| O | 5.3581934  | 3.7698348  | -0.7176455 |
| C | 5.3615926  | 5.1547839  | -1.1080457 |
| H | 6.2857661  | 5.650677   | -0.7803076 |
| H | 4.5053477  | 5.6841204  | -0.6667425 |
| H | 5.2912847  | 5.150608   | -2.2008103 |
| C | 0.982737   | 2.1631395  | -2.8871774 |
| N | 0.8062209  | 0.8183185  | -2.6155226 |
| H | 0.8868843  | 3.4112665  | -4.7476605 |
| C | 0.5710152  | 0.2340519  | -3.8476314 |
| C | 0.5720124  | 1.2263964  | -4.8918047 |
| H | 0.3942854  | 1.0132234  | -5.9422737 |
| C | 0.8156407  | 2.4265646  | -4.2938814 |
| C | 0.3276412  | -1.1110034 | -4.0589738 |
| N | 0.4052171  | -1.7859035 | -1.6985347 |
| C | 0.1146321  | -2.9808228 | -1.0631375 |
| C | -0.2618489 | -3.9901317 | -2.0191545 |
| H | -0.5454902 | -5.0066225 | -1.7603928 |
| C | -0.1803471 | -3.4137312 | -3.2519169 |
| H | -0.3894587 | -3.8532921 | -4.2233284 |



|    |            |            |            |
|----|------------|------------|------------|
| C  | 0.2201499  | -2.0460943 | -3.0454552 |
| C  | 1.3301097  | 3.1269522  | -1.9566411 |
| H  | 2.6556955  | 3.6064145  | 2.4262468  |
| C  | 2.2760275  | 3.2019198  | 1.4929962  |
| C  | 1.9327516  | 1.8205049  | 1.2773136  |
| H  | 2.1931985  | 4.9032195  | 0.0867197  |
| N  | 1.4951525  | 1.6209009  | -0.0215884 |
| C  | 1.5875786  | 2.8644404  | -0.6236526 |
| C  | 2.0491876  | 3.8517202  | 0.3173497  |
| C  | 0.2186458  | -3.2044143 | 0.2984274  |
| H  | 1.8445693  | -1.2633743 | 4.1432337  |
| C  | 1.510066   | -1.4369173 | 3.1242443  |
| C  | 0.9474829  | -2.5565587 | 2.5888267  |
| H  | 0.7288422  | -3.5057197 | 3.0702471  |
| C  | 0.6921272  | -2.2695333 | 1.2007582  |
| N  | 1.0620751  | -0.9721955 | 0.8901593  |
| C  | 1.5653748  | -0.456365  | 2.071479   |
| C  | 2.0058434  | 0.842306   | 2.2505411  |
| Co | 1.076715   | -0.1046697 | -0.8900435 |
| C  | 5.4890936  | 1.8591816  | 2.4861935  |
| H  | 5.0342347  | 0.8998803  | 2.7613255  |
| H  | 5.011852   | 2.6705098  | 3.0512418  |
| H  | 6.5446127  | 1.8428821  | 2.7999921  |
| H  | 0.1590443  | -1.4448667 | -5.0825375 |
| H  | 1.4466059  | 4.1530747  | -2.3046023 |
| H  | 2.3865622  | 1.1256121  | 3.2309906  |
| H  | -0.0361742 | -4.1947923 | 0.6748887  |

### C\_rotated

63

C\_rotated

|   |           |            |            |
|---|-----------|------------|------------|
| C | 2.8361381 | 0.3683025  | -1.5871114 |
| H | 2.9626343 | 0.9082067  | -2.5357595 |
| C | 3.8549607 | 0.6498487  | -0.6051144 |
| C | 5.6435107 | 1.5347290  | 1.4068412  |
| C | 4.2438191 | -0.2342466 | 0.4473690  |
| C | 4.4571071 | 1.9342995  | -0.6526336 |
| C | 5.3349379 | 2.3752642  | 0.3286836  |
| C | 5.0977541 | 0.2558123  | 1.4570592  |
| H | 4.1602757 | 2.6082668  | -1.4586622 |
| H | 5.7575369 | 3.3792754  | 0.2712433  |
| H | 5.3586443 | -0.4098692 | 2.2826268  |
| H | 6.3127294 | 1.8742264  | 2.1985834  |
| C | 3.8534322 | -1.6375421 | 0.5578581  |
| H | 3.7088064 | -1.9821198 | 1.5838227  |
| C | 3.7620817 | -2.5777182 | -0.4194474 |
| C | 3.4108613 | -3.9749074 | -0.0521040 |
| O | 3.2841262 | -4.8956865 | -0.8465946 |
| O | 3.2205688 | -4.1585926 | 1.2944049  |
| C | 2.8413536 | -5.4927669 | 1.6685404  |
| H | 3.6085262 | -6.2199939 | 1.3685867  |
| H | 1.8911040 | -5.7767154 | 1.1925734  |
| H | 2.7338684 | -5.4730280 | 2.7584584  |
| C | 0.4616125 | 2.3058598  | -3.3384937 |
| N | 0.5847123 | 0.9707399  | -2.9939076 |

|    |           |            |            |
|----|-----------|------------|------------|
| H  | 0.1446502 | 3.3969019  | -5.2718606 |
| C  | 0.5603612 | 0.2859392  | -4.1951797 |
| C  | 0.3734389 | 1.1962593  | -5.2956410 |
| H  | 0.3020074 | 0.8951313  | -6.3372788 |
| C  | 0.2899298 | 2.4485016  | -4.7618027 |
| C  | 0.6664535 | -1.0886274 | -4.3295139 |
| N  | 0.6535659 | -1.5894350 | -1.9293362 |
| C  | 0.5098586 | -2.7717706 | -1.2258558 |
| C  | 0.4552552 | -3.8965241 | -2.1239536 |
| H  | 0.3723661 | -4.9309929 | -1.8055169 |
| C  | 0.5809406 | -3.3986926 | -3.3856426 |
| H  | 0.5897026 | -3.9361410 | -4.3296639 |
| C  | 0.6742652 | -1.9660941 | -3.2605633 |
| C  | 0.6045892 | 3.3706093  | -2.4656692 |
| H  | 1.9009429 | 4.3182086  | 1.8566778  |
| C  | 1.5993667 | 3.8064518  | 0.9471719  |
| C  | 1.4627810 | 2.3792510  | 0.8253390  |
| H  | 1.2089902 | 5.3865056  | -0.5518526 |
| N  | 1.0545590 | 2.0362285  | -0.4519867 |
| C  | 0.9334358 | 3.2377335  | -1.1275302 |
| C  | 1.2492664 | 4.3412744  | -0.2577199 |
| C  | 0.4629371 | -2.8739074 | 0.1526251  |
| H  | 1.4920125 | -0.4649999 | 3.9368067  |
| C  | 1.2667980 | -0.7513882 | 2.9131558  |
| C  | 0.8575720 | -1.9612919 | 2.4346978  |
| H  | 0.6945383 | -2.8883151 | 2.9766416  |
| C  | 0.7112695 | -1.8185374 | 1.0097515  |
| N  | 0.9864701 | -0.5184640 | 0.6179636  |
| C  | 1.3239152 | 0.1425108  | 1.7853900  |
| C  | 1.6237948 | 1.4896924  | 1.8727202  |
| Co | 0.9795798 | 0.2213900  | -1.2119726 |
| C  | 4.0087038 | -2.3271547 | -1.8763571 |
| H  | 3.2866841 | -1.5737763 | -2.2469162 |
| H  | 3.9088760 | -3.2512235 | -2.4553166 |
| H  | 5.0085846 | -1.8958350 | -2.0351555 |
| H  | 0.3107607 | -3.8610562 | 0.5870000  |
| H  | 0.6670007 | -1.5062402 | -5.3359634 |
| H  | 1.9352136 | 1.8856442  | 2.8384190  |
| H  | 0.5160285 | 4.3783489  | -2.8711444 |

## D

63

|   |           |            |            |
|---|-----------|------------|------------|
| D |           |            |            |
| C | 3.0497832 | 0.0839626  | -0.0171684 |
| H | 3.2473205 | 0.5521115  | -0.9824552 |
| C | 3.5954014 | -1.2607734 | 0.1869027  |
| C | 4.2890733 | -3.9374294 | 0.8223389  |
| C | 3.7841206 | -2.2227751 | -0.8640571 |
| C | 3.8415408 | -1.6719452 | 1.5122688  |
| C | 4.2051509 | -2.9754744 | 1.8360087  |
| C | 4.06205   | -3.5626632 | -0.4958444 |
| H | 3.6922002 | -0.9412929 | 2.3096333  |
| H | 4.3837833 | -3.2490497 | 2.8766673  |
| H | 4.1370366 | -4.308536  | -1.2892385 |
| H | 4.5304861 | -4.9741095 | 1.0604228  |

|    |           |            |            |
|----|-----------|------------|------------|
| C  | 3.6739263 | -1.9708028 | -2.2797621 |
| H  | 3.3011399 | -2.8058749 | -2.8766037 |
| C  | 4.0988833 | -0.8559888 | -3.0387241 |
| C  | 3.6825801 | -0.8968809 | -4.4840571 |
| O  | 3.0564633 | -1.8039751 | -5.0079323 |
| O  | 4.087658  | 0.2048072  | -5.1718364 |
| C  | 3.6897924 | 0.2346482  | -6.5559401 |
| H  | 4.1138506 | 1.1587612  | -6.9623999 |
| H  | 2.5942319 | 0.2439617  | -6.6380987 |
| H  | 4.0789484 | -0.6413882 | -7.0923332 |
| C  | 1.1545146 | 1.7151254  | -2.5987626 |
| N  | 0.9119838 | 0.5027371  | -1.9734525 |
| H  | 1.1927466 | 2.4027269  | -4.7320233 |
| C  | 0.661326  | -0.3817026 | -3.0107888 |
| C  | 0.7188624 | 0.2888147  | -4.2831108 |
| H  | 0.555472  | -0.2053188 | -5.2359801 |
| C  | 1.0467474 | 1.5867209  | -4.0296514 |
| C  | 0.4600855 | -1.7401249 | -2.8708133 |
| N  | 0.6652164 | -1.7995853 | -0.4226341 |
| C  | 0.6611117 | -2.8489395 | 0.4819932  |
| C  | 0.5009638 | -4.1104885 | -0.1942464 |
| H  | 0.472234  | -5.0750297 | 0.3048629  |
| C  | 0.3839046 | -3.8311512 | -1.5226129 |
| H  | 0.2410616 | -4.5154297 | -2.3543202 |
| C  | 0.4926769 | -2.4011641 | -1.6565788 |
| C  | 1.4072126 | 2.9093076  | -1.9488266 |
| H  | 1.4598451 | 4.7802922  | 2.2616629  |
| C  | 1.405705  | 4.0807673  | 1.4319929  |
| C  | 1.1902965 | 2.6639209  | 1.5738873  |
| H  | 1.7002903 | 5.2748099  | -0.4072451 |
| N  | 1.1417595 | 2.0457263  | 0.3356208  |
| C  | 1.3687004 | 3.0643351  | -0.5749686 |
| C  | 1.5287618 | 4.3276907  | 0.0970673  |
| C  | 0.7508626 | -2.7157782 | 1.8536029  |
| H  | 0.9798054 | 0.47288    | 5.1713374  |
| C  | 0.9436339 | -0.0288931 | 4.2081389  |
| C  | 0.8575984 | -1.363642  | 3.9422305  |
| H  | 0.8057003 | -2.1948298 | 4.6401167  |
| C  | 0.8283842 | -1.5008786 | 2.5099692  |
| N  | 0.8974952 | -0.2638426 | 1.8932913  |
| C  | 0.9779836 | 0.6455918  | 2.9362568  |
| C  | 1.103442  | 2.0153752  | 2.7927072  |
| Co | 1.0284471 | 0.109176   | -0.039758  |
| C  | 4.914397  | 0.1648265  | -2.5894922 |
| H  | 5.3210046 | 0.1450197  | -1.5797226 |
| H  | 5.2054643 | 0.9819191  | -3.2436012 |
| H  | 3.2853913 | 0.7594761  | 0.8123335  |
| H  | 1.5979168 | 3.7926675  | -2.5578817 |
| H  | 1.1618138 | 2.6200245  | 3.6975938  |
| H  | 0.3305592 | -2.3308532 | -3.776301  |
| H  | 0.7394732 | -3.6226764 | 2.4571658  |

**D'**

66

D'

|    |           |            |            |
|----|-----------|------------|------------|
| C  | 3.0248137 | 0.0560562  | -0.0278710 |
| H  | 3.2228614 | 0.4978845  | -1.0051262 |
| C  | 3.5459588 | -1.2890740 | 0.2001279  |
| C  | 4.1575692 | -3.9842381 | 0.8314448  |
| C  | 3.7801825 | -2.2389008 | -0.8555337 |
| C  | 3.7328407 | -1.7149307 | 1.5301475  |
| C  | 4.0580582 | -3.0279101 | 1.8525711  |
| C  | 3.9995054 | -3.5937422 | -0.4901584 |
| H  | 3.5656555 | -0.9890893 | 2.3282396  |
| H  | 4.1908429 | -3.3162853 | 2.8959385  |
| H  | 4.0965386 | -4.3321664 | -1.2882023 |
| H  | 4.3624121 | -5.0286192 | 1.0703641  |
| C  | 3.7706624 | -1.9525388 | -2.2630875 |
| H  | 3.4194885 | -2.7686090 | -2.8991041 |
| C  | 4.2173292 | -0.8143623 | -2.9865320 |
| C  | 3.7327415 | -0.7787435 | -4.4128803 |
| O  | 3.1361843 | -1.6858033 | -4.9703926 |
| O  | 4.0443034 | 0.3849001  | -5.0482047 |
| C  | 3.6188654 | 0.4600671  | -6.4220142 |
| H  | 3.9781152 | 1.4284282  | -6.7858071 |
| H  | 2.5239959 | 0.4066206  | -6.4873962 |
| H  | 4.0513962 | -0.3615046 | -7.0090917 |
| C  | 1.0289247 | 1.6673599  | -2.6276298 |
| N  | 0.8639836 | 0.4505216  | -1.9849890 |
| H  | 0.9913902 | 2.3325905  | -4.7676362 |
| C  | 0.6595153 | -0.4596668 | -3.0103583 |
| C  | 0.6639017 | 0.1970494  | -4.2906198 |
| H  | 0.5223481 | -0.3188456 | -5.2352612 |
| C  | 0.9064857 | 1.5166746  | -4.0550998 |
| C  | 0.5175104 | -1.8236618 | -2.8527132 |
| N  | 0.6314818 | -1.8315045 | -0.3995359 |
| C  | 0.5664117 | -2.8595040 | 0.5271299  |
| C  | 0.4254684 | -4.1348059 | -0.1272358 |
| H  | 0.3562626 | -5.0865060 | 0.3921308  |
| C  | 0.3929991 | -3.8868747 | -1.4663235 |
| H  | 0.2903364 | -4.5892812 | -2.2887971 |
| C  | 0.5186647 | -2.4610669 | -1.6262456 |
| C  | 1.2527763 | 2.8780093  | -1.9985330 |
| H  | 1.5415156 | 4.7801237  | 2.1880556  |
| C  | 1.4391542 | 4.0748579  | 1.3677352  |
| C  | 1.2341948 | 2.6588885  | 1.5320802  |
| H  | 1.6037014 | 5.2582528  | -0.4946922 |
| N  | 1.1157344 | 2.0306718  | 0.3032419  |
| C  | 1.2795791 | 3.0442910  | -0.6259671 |
| C  | 1.4711134 | 4.3138220  | 0.0261370  |
| C  | 0.6082277 | -2.6990224 | 1.8979544  |
| H  | 1.0336409 | 0.5227075  | 5.1620716  |
| C  | 0.9544769 | 0.0098836  | 4.2072886  |
| C  | 0.7782790 | -1.3200770 | 3.9629408  |
| H  | 0.6837504 | -2.1365289 | 4.6737014  |
| C  | 0.7296251 | -1.4768091 | 2.5331189  |
| N  | 0.8631713 | -0.2549182 | 1.8965802  |
| C  | 1.0092227 | 0.6626824  | 2.9248859  |
| C  | 1.1887119 | 2.0241677  | 2.7601573  |
| Co | 0.9939778 | 0.0860780  | -0.0456866 |
| C  | 5.1464894 | 0.1330767  | -2.5873957 |

|   |           |            |            |
|---|-----------|------------|------------|
| H | 5.3492001 | 0.9426737  | -3.2882405 |
| H | 3.2511689 | 0.7459549  | 0.7918817  |
| H | 1.3877390 | 3.7609362  | -2.6230648 |
| H | 1.3002205 | 2.6360660  | 3.6552157  |
| H | 0.4281846 | -2.4322300 | -3.7513152 |
| H | 0.5463547 | -3.5924217 | 2.5185660  |
| C | 5.9669625 | 0.1126978  | -1.3446198 |
| H | 6.9749758 | 0.5009757  | -1.5516057 |
| H | 6.0465398 | -0.8920575 | -0.9107685 |
| H | 5.5357316 | 0.7596303  | -0.5593089 |

**E**

26

|   |            |            |            |
|---|------------|------------|------------|
| E |            |            |            |
| H | 1.4598097  | 1.5696417  | 0.2616948  |
| C | 0.7841259  | 1.2715462  | 1.0659108  |
| C | -0.9717025 | 0.5069360  | 3.1170752  |
| C | -0.1293391 | 0.1658734  | 0.7910445  |
| C | 0.7371932  | 1.9807213  | 2.2226462  |
| C | -0.2055774 | 1.6214042  | 3.2510957  |
| C | -0.8859405 | -0.3692592 | 1.9551630  |
| H | 1.3949017  | 2.8383252  | 2.3704012  |
| H | -0.2729181 | 2.2275296  | 4.1554548  |
| H | -1.6349155 | 0.1986622  | 3.9278939  |
| C | -0.2624684 | -0.2288275 | -0.5058132 |
| H | -1.0197540 | -0.9226255 | -0.8450687 |
| H | 0.3939536  | 0.1939743  | -1.2682312 |
| C | -1.3578009 | -1.6504635 | 2.1370900  |
| H | -1.7249887 | -1.8559101 | 3.1472786  |
| C | -1.3022455 | -2.8381219 | 1.2929826  |
| C | -1.8169215 | -2.9677288 | 0.0525001  |
| H | -1.7297303 | -3.9176240 | -0.4752824 |
| H | -2.3919045 | -2.1692653 | -0.4105394 |
| C | -0.6884129 | -4.0863310 | 1.8831237  |
| O | -0.3234044 | -3.8975741 | 3.1800003  |
| O | -0.5232651 | -5.1359552 | 1.2902793  |
| C | 0.2674985  | -5.0518540 | 3.8174907  |
| H | -0.4368677 | -5.8947380 | 3.8185454  |
| H | 0.4959303  | -4.7340670 | 4.8396253  |
| H | 1.1817440  | -5.3542691 | 3.2896386  |

**E'**

29

|     |            |            |           |
|-----|------------|------------|-----------|
| TS8 |            |            |           |
| H   | 0.8984042  | 2.1414293  | 0.1375660 |
| C   | 0.5828517  | 1.6378924  | 1.0536136 |
| C   | -0.2681283 | 0.3523042  | 3.4003268 |
| C   | -0.1731044 | 0.4022980  | 0.9084092 |
| C   | 0.8437453  | 2.1901389  | 2.2672276 |
| C   | 0.3693669  | 1.5524832  | 3.4677143 |
| C   | -0.4707490 | -0.3599151 | 2.1493323 |
| H   | 1.3886892  | 3.1325411  | 2.3381068 |

|   |            |            |            |
|---|------------|------------|------------|
| H | 0.5415872  | 2.0283427  | 4.4339288  |
| H | -0.5926163 | -0.1448292 | 4.3169140  |
| C | -0.6325334 | 0.0580704  | -0.3289785 |
| H | -1.2743650 | -0.8057423 | -0.4911417 |
| H | -0.4198358 | 0.6933892  | -1.1893454 |
| C | -0.9460037 | -1.6539506 | 2.2605256  |
| H | -1.3061828 | -1.9066576 | 3.2618927  |
| C | -1.0506111 | -2.7620393 | 1.3295224  |
| C | -0.1283290 | -3.1447886 | 0.3990382  |
| H | -0.3692574 | -4.0527276 | -0.1594354 |
| C | 1.1289075  | -2.4442357 | 0.0758662  |
| H | 1.8823438  | -3.1241572 | -0.3420559 |
| H | 1.5408598  | -1.9008073 | 0.9393251  |
| H | 0.9257020  | -1.6527809 | -0.6820396 |
| C | -2.2193173 | -3.6998298 | 1.4859164  |
| O | -2.4411930 | -4.6791422 | 0.7957648  |
| O | -3.0440123 | -3.3167681 | 2.5020841  |
| C | -4.1878380 | -4.1735084 | 2.7088617  |
| H | -3.8668203 | -5.1943455 | 2.9566820  |
| H | -4.8104569 | -4.2081422 | 1.8047713  |
| H | -4.7391036 | -3.7265218 | 3.5426067  |

**E''**

29

E''

|   |            |            |            |
|---|------------|------------|------------|
| H | 0.5055901  | 1.9535053  | 0.0432676  |
| C | 0.3368331  | 1.4672918  | 1.0063528  |
| C | -0.1305425 | 0.2235400  | 3.4963148  |
| C | -0.4829077 | 0.2591828  | 1.0172123  |
| C | 0.8014575  | 2.0257431  | 2.1525604  |
| C | 0.5106746  | 1.4191386  | 3.4323513  |
| C | -0.5212786 | -0.5080993 | 2.2982187  |
| H | 1.3730495  | 2.9545029  | 2.1197823  |
| H | 0.8395265  | 1.9155279  | 4.3462683  |
| H | -0.2984922 | -0.2619885 | 4.4601763  |
| C | -1.2445593 | -0.0368763 | -0.0675823 |
| H | -1.9379081 | -0.8748820 | -0.0842887 |
| H | -1.1899520 | 0.5823964  | -0.9639735 |
| C | -0.8480532 | -1.8292430 | 2.4424260  |
| H | -0.9585961 | -2.1909061 | 3.4693836  |
| C | -1.0271686 | -2.8540792 | 1.3980076  |
| C | -0.0407864 | -3.0982447 | 0.5008025  |
| C | -2.2889135 | -3.6518546 | 1.4191724  |
| O | -2.6907750 | -4.4155260 | 0.5564559  |
| O | -2.9924162 | -3.4080298 | 2.5654426  |
| C | -4.2375302 | -4.1294471 | 2.6785122  |
| H | -4.6780604 | -3.8024471 | 3.6258131  |
| H | -4.0571320 | -5.2130350 | 2.6879986  |
| H | -4.9010107 | -3.8888058 | 1.8369733  |
| H | 0.8420562  | -2.4578883 | 0.6007086  |
| C | 0.0007509  | -4.0723373 | -0.6255339 |
| H | 1.0028217  | -4.5194235 | -0.7063260 |
| H | -0.1740487 | -3.5312278 | -1.5737841 |

|   |            |            |            |
|---|------------|------------|------------|
| H | -0.7616283 | -4.8524874 | -0.5487126 |
|---|------------|------------|------------|

**F**

26

|   |            |            |            |
|---|------------|------------|------------|
| F |            |            |            |
| H | 0.0297263  | 1.9912538  | -0.1593652 |
| C | 0.0904589  | 1.6186063  | 0.8656713  |
| C | 0.2264240  | 0.6834676  | 3.4894153  |
| C | -0.1517519 | 0.2682154  | 1.1161977  |
| C | 0.4050289  | 2.4984354  | 1.9081423  |
| C | 0.4699476  | 2.0303455  | 3.2235814  |
| C | -0.0749156 | -0.2111752 | 2.4471954  |
| H | 0.5960907  | 3.5504278  | 1.6917070  |
| H | 0.7102823  | 2.7140744  | 4.0385529  |
| H | 0.2790701  | 0.3077367  | 4.5135436  |
| C | -0.5722329 | -0.6999987 | 0.0356582  |
| H | -1.6777027 | -0.7303661 | 0.0169580  |
| H | -0.2524981 | -0.3377558 | -0.9519685 |
| C | -0.3036354 | -1.6246068 | 2.7074611  |
| H | -0.4392738 | -1.9433627 | 3.7423202  |
| C | -0.3002902 | -2.5454615 | 1.7124478  |
| C | -0.0449082 | -2.1166041 | 0.2874499  |
| H | 1.0437998  | -2.1579622 | 0.0989752  |
| H | -0.4994596 | -2.8365152 | -0.4052969 |
| C | -0.4550020 | -3.9958464 | 1.9615067  |
| O | -0.3949466 | -4.8497250 | 1.0888097  |
| O | -0.6703778 | -4.2972193 | 3.2766825  |
| C | -0.8206705 | -5.7045838 | 3.5541630  |
| H | -1.6767252 | -6.1193197 | 3.0042083  |
| H | 0.0843588  | -6.2561410 | 3.2645419  |
| H | -0.9857968 | -5.7729196 | 4.6344410  |

**F'**

29

|    |            |            |            |
|----|------------|------------|------------|
| F' |            |            |            |
| H  | 0.0437935  | 1.9972897  | -0.1512857 |
| C  | 0.0932272  | 1.6266455  | 0.8750856  |
| C  | 0.2075283  | 0.6946104  | 3.5014057  |
| C  | -0.1585057 | 0.2782417  | 1.1263437  |
| C  | 0.4026723  | 2.5068485  | 1.9188035  |
| C  | 0.4557329  | 2.0406445  | 3.2356274  |
| C  | -0.0895300 | -0.1996622 | 2.4577500  |
| H  | 0.5992653  | 3.5579168  | 1.7023879  |
| H  | 0.6923112  | 2.7248848  | 4.0512601  |
| H  | 0.2549248  | 0.3191640  | 4.5259047  |
| C  | -0.5735568 | -0.6923823 | 0.0478410  |
| H  | -1.6783230 | -0.7300118 | 0.0321826  |
| H  | -0.2572483 | -0.3276422 | -0.9410585 |
| C  | -0.3116389 | -1.6142612 | 2.7131087  |
| H  | -0.4404876 | -1.9366581 | 3.7478667  |
| C  | -0.3081165 | -2.5329594 | 1.7159163  |

|   |            |            |            |
|---|------------|------------|------------|
| C | -0.0342867 | -2.1126441 | 0.2853906  |
| H | -0.5619838 | -2.8092834 | -0.3820374 |
| C | -0.4500026 | -3.9847010 | 1.9660253  |
| O | -0.3687017 | -4.8394506 | 1.0952647  |
| O | -0.6795834 | -4.2877498 | 3.2781841  |
| C | -0.8146774 | -5.6967553 | 3.5554161  |
| H | -1.6599357 | -6.1226417 | 2.9972203  |
| H | 0.1001154  | -6.2369512 | 3.2750008  |
| H | -0.9896859 | -5.7664863 | 4.6340039  |
| C | 1.4735314  | -2.2226866 | -0.0120214 |
| H | 2.0476630  | -1.5409165 | 0.6326891  |
| H | 1.6803456  | -1.9613296 | -1.0604716 |
| H | 1.8251533  | -3.2480726 | 0.1621960  |

**G**

29

G

|   |            |            |            |
|---|------------|------------|------------|
| H | 0.8428574  | 2.4764432  | -0.1531029 |
| C | 0.6429395  | 1.9299739  | 0.7712974  |
| C | 0.0772804  | 0.5904899  | 3.1271626  |
| C | -0.1042697 | 0.7455160  | 0.7005242  |
| C | 1.1233119  | 2.4315332  | 1.9813309  |
| C | 0.8332940  | 1.7592482  | 3.1708633  |
| C | -0.3697567 | 0.0489004  | 1.9057807  |
| H | 1.7053056  | 3.3540460  | 1.9967872  |
| H | 1.1852713  | 2.1473046  | 4.1274923  |
| H | -0.1592368 | 0.0621656  | 4.0529608  |
| C | -0.6067988 | 0.2676960  | -0.6352367 |
| H | -1.5756624 | -0.2421148 | -0.5488006 |
| H | -0.7135857 | 1.1071599  | -1.3351350 |
| C | -1.1575562 | -1.1946544 | 1.9690964  |
| H | -2.0098799 | -1.1634266 | 2.6527600  |
| C | -0.9474466 | -2.3703840 | 1.3206085  |
| C | 0.2039550  | -2.7149403 | 0.4730885  |
| H | -0.0016683 | -3.4624116 | -0.2967180 |
| C | 1.4561462  | -2.2601101 | 0.6295107  |
| H | 2.2549126  | -2.5948850 | -0.0327155 |
| H | 1.7247042  | -1.5521048 | 1.4142896  |
| H | 0.0935056  | -0.4574526 | -1.0780178 |
| C | -1.9530251 | -3.4769759 | 1.4452343  |
| O | -1.9145494 | -4.5085854 | 0.7948721  |
| O | -2.9330184 | -3.2204642 | 2.3564041  |
| C | -3.9209586 | -4.2646034 | 2.4895400  |
| H | -4.6198529 | -3.9073948 | 3.2526726  |
| H | -4.4390059 | -4.4306265 | 1.5353044  |
| H | -3.4492127 | -5.2053428 | 2.8041458  |

**TS1**

65

TS1

|   |           |            |            |
|---|-----------|------------|------------|
| C | 3.0556836 | -0.3753812 | -1.4316951 |
|---|-----------|------------|------------|



|    |            |            |            |
|----|------------|------------|------------|
| H  | 3.4014427  | 0.5745210  | -1.8560570 |
| C  | 3.9513268  | -0.9317067 | -0.3990240 |
| C  | 5.5057661  | -2.0595549 | 1.6607031  |
| C  | 4.8323145  | -0.1018707 | 0.3583870  |
| C  | 3.8817875  | -2.3049462 | -0.1021003 |
| C  | 4.6388459  | -2.8681797 | 0.9164047  |
| C  | 5.5992890  | -0.7007052 | 1.3801424  |
| H  | 3.1978408  | -2.9264958 | -0.6794047 |
| H  | 4.5567293  | -3.9340573 | 1.1314555  |
| H  | 6.3148920  | -0.0924229 | 1.9302603  |
| H  | 6.1205217  | -2.4933258 | 2.4506059  |
| C  | 4.9653992  | 1.3154007  | 0.0343483  |
| H  | 4.8101867  | 1.5731617  | -1.0132730 |
| C  | 5.2245353  | 2.3570134  | 0.8643105  |
| C  | 5.3133016  | 3.7336495  | 0.3021762  |
| O  | 5.4574330  | 4.7430908  | 0.9761134  |
| O  | 5.2053004  | 3.7769164  | -1.0597623 |
| C  | 5.2146243  | 5.0997382  | -1.6244150 |
| H  | 6.1532622  | 5.6200738  | -1.3897401 |
| H  | 4.3781346  | 5.6953780  | -1.2309873 |
| H  | 5.1107019  | 4.9566397  | -2.7050880 |
| C  | 1.3387158  | 2.2384905  | -2.8865798 |
| N  | 0.9290521  | 0.9371732  | -2.6542163 |
| H  | 1.3782512  | 3.5707220  | -4.6904584 |
| C  | 0.4651464  | 0.4866068  | -3.8768572 |
| C  | 0.5850864  | 1.5143490  | -4.8796023 |
| H  | 0.2754447  | 1.4016156  | -5.9149591 |
| C  | 1.1409604  | 2.5981609  | -4.2679338 |
| C  | -0.0457774 | -0.7758051 | -4.1181848 |
| N  | 0.3593241  | -1.6857977 | -1.8689344 |
| C  | 0.1882916  | -2.9546528 | -1.3397923 |
| C  | -0.3815879 | -3.8458455 | -2.3171802 |
| H  | -0.6138863 | -4.8912913 | -2.1337911 |
| C  | -0.5695542 | -3.1162002 | -3.4517976 |
| H  | -0.9789070 | -3.4351317 | -4.4062823 |
| C  | -0.0931454 | -1.7861926 | -3.1747442 |
| C  | 1.7896979  | 3.1153008  | -1.9150976 |
| H  | 2.3810857  | 3.4660270  | 2.6392258  |
| C  | 2.1716533  | 3.0891581  | 1.6426883  |
| C  | 1.8568714  | 1.7186633  | 1.3377347  |
| H  | 2.4117544  | 4.8113750  | 0.2814556  |
| N  | 1.6321026  | 1.5580515  | -0.0193887 |
| C  | 1.8625088  | 2.8092098  | -0.5681559 |
| C  | 2.1870977  | 3.7636956  | 0.4584236  |
| C  | 0.4777383  | -3.3208995 | -0.0377564 |
| H  | 1.8172581  | -1.5510454 | 3.9996844  |
| C  | 1.5547015  | -1.6798499 | 2.9533537  |
| C  | 1.1671619  | -2.8127876 | 2.3031244  |
| H  | 1.0422002  | -3.8166537 | 2.6996006  |
| C  | 0.9197417  | -2.4406754 | 0.9339159  |
| N  | 1.1597547  | -1.0930086 | 0.7380375  |
| C  | 1.5455867  | -0.6183880 | 1.9796802  |
| C  | 1.8500008  | 0.6986573  | 2.2713592  |
| Co | 1.1687395  | -0.1095578 | -0.9830671 |
| C  | 5.3534961  | 2.2854745  | 2.3597680  |
| H  | 4.7938717  | 1.4318938  | 2.7625761  |

|   |            |            |            |
|---|------------|------------|------------|
| H | 4.9804899  | 3.2144425  | 2.8074617  |
| H | 6.4054052  | 2.1869046  | 2.6723372  |
| H | -0.4064007 | -0.9983379 | -5.1220072 |
| H | 2.0530221  | 4.1274077  | -2.2209998 |
| H | 2.0991460  | 0.9498467  | 3.3020027  |
| H | 0.3145562  | -4.3594638 | 0.2492584  |
| N | 3.3644651  | -1.3609732 | -2.8914918 |
| N | 2.8295596  | -2.2476049 | -3.3537704 |

## TS2

63

TS2

|   |           |            |            |
|---|-----------|------------|------------|
| C | 2.9162008 | 0.4414839  | -1.3445702 |
| H | 3.0875378 | 1.2429183  | -2.0794621 |
| C | 3.8222648 | 0.5065043  | -0.1985841 |
| C | 5.2659556 | 0.8427691  | 2.2057813  |
| C | 4.1759346 | -0.6411288 | 0.5847537  |
| C | 4.2942694 | 1.7709607  | 0.2046767  |
| C | 5.0117225 | 1.9476254  | 1.3864837  |
| C | 4.8517190 | -0.4247673 | 1.8039351  |
| H | 4.0336359 | 2.6371312  | -0.4067659 |
| H | 5.3432406 | 2.9443926  | 1.6801668  |
| H | 5.0773966 | -1.2894676 | 2.4314430  |
| H | 5.7959521 | 0.9673407  | 3.1511212  |
| C | 3.8918464 | -2.0172311 | 0.2111404  |
| H | 3.8221363 | -2.7219499 | 1.0409967  |
| C | 3.7994407 | -2.5304045 | -1.0588399 |
| C | 3.4963562 | -3.9642132 | -1.2849103 |
| O | 3.4710775 | -4.5056474 | -2.3810276 |
| O | 3.2509231 | -4.6573976 | -0.1280572 |
| C | 2.9991688 | -6.0608694 | -0.3194812 |
| H | 3.8712670 | -6.5569114 | -0.7682611 |
| H | 2.1340554 | -6.2127613 | -0.9798324 |
| H | 2.7999861 | -6.4628300 | 0.6799318  |
| C | 0.6789718 | 1.9257362  | -3.5615579 |
| N | 0.7160994 | 0.6958665  | -2.9285471 |
| H | 0.5645801 | 2.5824092  | -5.7023688 |
| C | 0.7082947 | -0.2334132 | -3.9544664 |
| C | 0.6548560 | 0.4216005  | -5.2359877 |
| H | 0.6260367 | -0.0972512 | -6.1902093 |
| C | 0.6205055 | 1.7623956  | -4.9916794 |
| C | 0.6728187 | -1.6057838 | -3.7830805 |
| N | 0.6632910 | -1.5765165 | -1.3271578 |
| C | 0.4869526 | -2.5795684 | -0.3861396 |
| C | 0.2555224 | -3.8464828 | -1.0280050 |
| H | 0.0827245 | -4.7777523 | -0.4967613 |
| C | 0.3453342 | -3.6322025 | -2.3701278 |
| H | 0.2679333 | -4.3498949 | -3.1810531 |
| C | 0.5861396 | -2.2241352 | -2.5494361 |
| C | 0.7330485 | 3.1525606  | -2.9235021 |
| H | 1.4818040 | 5.0423989  | 1.2110803  |
| C | 1.3052725 | 4.3366973  | 0.4040044  |
| C | 1.2801746 | 2.9073073  | 0.5654158  |
| H | 0.9904887 | 5.5482520  | -1.4213762 |

|    |           |            |            |
|----|-----------|------------|------------|
| N  | 1.0120048 | 2.2826533  | -0.6398790 |
| C  | 0.8989655 | 3.3135734  | -1.5594178 |
| C  | 1.0565797 | 4.5901141  | -0.9131953 |
| C  | 0.6269871 | -2.4237882 | 0.9777101  |
| H  | 1.7642808 | 0.7262911  | 4.1426538  |
| C  | 1.5122998 | 0.2282370  | 3.2107383  |
| C  | 1.2221929 | -1.0854705 | 2.9944587  |
| H  | 1.1870247 | -1.9022835 | 3.7100169  |
| C  | 0.9559135 | -1.2255430 | 1.5858184  |
| N  | 1.0731983 | -0.0093863 | 0.9390694  |
| C  | 1.3946550 | 0.8930466  | 1.9387146  |
| C  | 1.5062387 | 2.2590702  | 1.7669411  |
| Co | 1.0128005 | 0.3435423  | -1.0086051 |
| C  | 3.9883833 | -1.7172367 | -2.2587461 |
| H  | 3.2001325 | -0.7048901 | -2.0436086 |
| H  | 3.7077924 | -2.1984711 | -3.1984342 |
| H  | 4.9390791 | -1.1732887 | -2.3131410 |
| H  | 0.5274134 | -3.3081180 | 1.6059018  |
| H  | 0.6485185 | -2.2342807 | -4.6727401 |
| H  | 1.7544674 | 2.8662425  | 2.6365711  |
| H  | 0.6821364 | 4.0502168  | -3.5395099 |

### TS3

63

TS3

|   |           |            |            |
|---|-----------|------------|------------|
| C | 3.1806256 | -0.0620320 | -0.3197697 |
| H | 2.7910453 | 0.1492862  | -1.3073279 |
| C | 3.6104300 | -1.4049096 | 0.1049726  |
| C | 4.1995808 | -4.0153532 | 1.0149967  |
| C | 3.8120692 | -2.4659800 | -0.8338997 |
| C | 3.7888856 | -1.6749799 | 1.4656513  |
| C | 4.0878084 | -2.9633483 | 1.9228339  |
| C | 4.0618807 | -3.7601146 | -0.3522533 |
| H | 3.6381236 | -0.8686409 | 2.1848191  |
| H | 4.2046131 | -3.1406928 | 2.9925855  |
| H | 4.1779589 | -4.5721291 | -1.0722858 |
| H | 4.4008272 | -5.0289431 | 1.3634246  |
| C | 3.7645018 | -2.2224833 | -2.2665400 |
| H | 3.4053750 | -3.0157229 | -2.9234512 |
| C | 4.1476488 | -1.0285513 | -2.8338346 |
| C | 3.8191988 | -0.8277789 | -4.2722916 |
| O | 3.2991080 | -1.6569525 | -5.0025378 |
| O | 4.1605364 | 0.4226392  | -4.6981211 |
| C | 3.8264575 | 0.7067243  | -6.0712879 |
| H | 4.1845950 | 1.7250461  | -6.2541555 |
| H | 2.7397990 | 0.6478327  | -6.2173062 |
| H | 4.3189345 | -0.0068377 | -6.7455823 |
| C | 0.7630086 | 1.7107856  | -2.7302746 |
| N | 0.7381696 | 0.4798543  | -2.0956936 |
| H | 0.6010478 | 2.3772169  | -4.8649360 |
| C | 0.6115534 | -0.4442090 | -3.1206625 |
| C | 0.5373290 | 0.2147513  | -4.3979907 |
| H | 0.4419433 | -0.3059629 | -5.3462616 |
| C | 0.6210728 | 1.5543214  | -4.1554688 |

|    |           |            |            |
|----|-----------|------------|------------|
| C  | 0.5703310 | -1.8152911 | -2.9529625 |
| N  | 0.6467114 | -1.8097955 | -0.4935270 |
| C  | 0.5501458 | -2.8287997 | 0.4390597  |
| C  | 0.4174345 | -4.1081212 | -0.2113636 |
| H  | 0.3252134 | -5.0559448 | 0.3115274  |
| C  | 0.4420348 | -3.8708802 | -1.5524289 |
| H  | 0.3658836 | -4.5798944 | -2.3721999 |
| C  | 0.5700039 | -2.4447212 | -1.7201335 |
| C  | 0.9556166 | 2.9262034  | -2.0969131 |
| H  | 1.8544655 | 4.7771878  | 2.0262310  |
| C  | 1.6332215 | 4.0803026  | 1.2223711  |
| C  | 1.4743114 | 2.6589312  | 1.3959854  |
| H  | 1.4573329 | 5.2935520  | -0.6189597 |
| N  | 1.1849792 | 2.0436083  | 0.1899210  |
| C  | 1.1668476 | 3.0732414  | -0.7368869 |
| C  | 1.4315414 | 4.3388942  | -0.1005219 |
| C  | 0.6014979 | -2.6606276 | 1.8092077  |
| H  | 1.5110355 | 0.5087303  | 5.0258000  |
| C  | 1.3100993 | 0.0101764  | 4.0813918  |
| C  | 0.9927852 | -1.2970783 | 3.8558188  |
| H  | 0.8841484 | -2.1047682 | 4.5744842  |
| C  | 0.8254724 | -1.4458855 | 2.4338461  |
| N  | 1.0108019 | -0.2360925 | 1.7883704  |
| C  | 1.3140107 | 0.6636995  | 2.7980219  |
| C  | 1.5610534 | 2.0131094  | 2.6169369  |
| Co | 0.9999087 | 0.1045057  | -0.1477358 |
| C  | 4.7291577 | 0.0202788  | -2.0411899 |
| H  | 5.4564453 | -0.2375690 | -1.2724526 |
| H  | 4.7596085 | 1.0371281  | -2.4257508 |
| H  | 3.5068229 | 0.7888996  | 0.2778887  |
| H  | 0.9663833 | 3.8253994  | -2.7128745 |
| H  | 1.7975995 | 2.6115872  | 3.4965560  |
| H  | 0.5274271 | -2.4352046 | -3.8472963 |
| H  | 0.5085401 | -3.5465973 | 2.4364275  |

#### TS4

26

TS4

|   |            |            |            |
|---|------------|------------|------------|
| H | 0.8145409  | 1.7337865  | 0.0513506  |
| C | 0.3712721  | 1.3815021  | 0.9850571  |
| C | -0.8360580 | 0.5096991  | 3.3667006  |
| C | -0.5095971 | 0.2475135  | 0.9300545  |
| C | 0.5278011  | 2.0985526  | 2.1437101  |
| C | -0.1385964 | 1.6895176  | 3.3369700  |
| C | -0.9291815 | -0.3299323 | 2.2019940  |
| H | 1.1317415  | 3.0068573  | 2.1466481  |
| H | -0.0458012 | 2.2928970  | 4.2408632  |
| H | -1.2565823 | 0.1415567  | 4.3047792  |
| C | -0.9558869 | -0.2249274 | -0.2951886 |
| H | -1.9678625 | -0.5928500 | -0.3924024 |
| H | -0.4812707 | 0.1182065  | -1.2166595 |
| C | -1.0719582 | -1.7119209 | 2.4055684  |
| H | -1.1462397 | -2.0113687 | 3.4529576  |
| C | -0.7264210 | -2.7422416 | 1.4870474  |

|   |            |            |            |
|---|------------|------------|------------|
| C | -0.9861670 | -2.7730117 | 0.1305459  |
| H | -0.4359431 | -3.4799861 | -0.4917305 |
| H | -1.9168655 | -2.3979242 | -0.2650598 |
| C | 0.1433014  | -3.8627851 | 1.9971396  |
| O | 0.8161028  | -4.5951774 | 1.2942481  |
| O | 0.0944013  | -3.9825455 | 3.3542466  |
| C | 0.8847665  | -5.0646324 | 3.8926049  |
| H | 0.5526007  | -6.0280871 | 3.4824906  |
| H | 1.9465374  | -4.9234340 | 3.6496758  |
| H | 0.7263654  | -5.0292646 | 4.9753886  |

**TS5**

66

TS5

|   |           |            |            |
|---|-----------|------------|------------|
| C | 3.1791523 | -0.0505641 | -0.3430582 |
| H | 2.8409278 | 0.1281898  | -1.3533516 |
| C | 3.6051302 | -1.3742609 | 0.1161593  |
| C | 4.2033809 | -3.9621631 | 1.0839836  |
| C | 3.7973923 | -2.4580056 | -0.7952085 |
| C | 3.8046492 | -1.6098611 | 1.4817889  |
| C | 4.1065449 | -2.8865620 | 1.9663763  |
| C | 4.0497948 | -3.7405653 | -0.2876341 |
| H | 3.6648882 | -0.7846383 | 2.1817150  |
| H | 4.2371652 | -3.0380997 | 3.0385553  |
| H | 4.1578500 | -4.5697996 | -0.9891575 |
| H | 4.4059977 | -4.9672055 | 1.4554941  |
| C | 3.7592331 | -2.2442145 | -2.2346246 |
| H | 3.3887087 | -3.0526190 | -2.8676978 |
| C | 4.1511444 | -1.0852586 | -2.8492107 |
| C | 3.8313738 | -0.9573178 | -4.2983446 |
| O | 3.2817593 | -1.8036080 | -4.9861069 |
| O | 4.2242336 | 0.2545932  | -4.7914433 |
| C | 3.8899178 | 0.4820560  | -6.1751170 |
| H | 4.3072664 | 1.4646940  | -6.4189582 |
| H | 2.7992635 | 0.4830963  | -6.3052949 |
| H | 4.3271572 | -0.2973648 | -6.8138101 |
| C | 0.8332795 | 1.6724457  | -2.8021907 |
| N | 0.7713786 | 0.4603720  | -2.1348915 |
| H | 0.7152587 | 2.2845517  | -4.9561845 |
| C | 0.6342464 | -0.4875990 | -3.1362311 |
| C | 0.5908555 | 0.1377959  | -4.4319501 |
| H | 0.4944456 | -0.4064139 | -5.3668107 |
| C | 0.7065107 | 1.4808687  | -4.2247469 |
| C | 0.5636484 | -1.8526828 | -2.9336705 |
| N | 0.6408197 | -1.7874847 | -0.4749101 |
| C | 0.5431077 | -2.7837690 | 0.4816973  |
| C | 0.3964441 | -4.0771029 | -0.1372026 |
| H | 0.3005380 | -5.0115744 | 0.4086071  |
| C | 0.4132492 | -3.8716550 | -1.4836234 |
| H | 0.3262321 | -4.5990977 | -2.2860147 |
| C | 0.5531705 | -2.4510282 | -1.6856822 |
| C | 1.0395460 | 2.9009000  | -2.1990010 |
| H | 1.8769534 | 4.8530054  | 1.8900415  |
| C | 1.6638709 | 4.1370446  | 1.1008434  |

|    |           |            |            |
|----|-----------|------------|------------|
| C  | 1.4873937 | 2.7223897  | 1.3090119  |
| H  | 1.5398005 | 5.3015460  | -0.7759693 |
| N  | 1.2128464 | 2.0777794  | 0.1148078  |
| C  | 1.2258496 | 3.0821028  | -0.8394985 |
| C  | 1.4926903 | 4.3616829  | -0.2325260 |
| C  | 0.6041662 | -2.5844335 | 1.8473091  |
| H  | 1.4966061 | 0.6621483  | 4.9910081  |
| C  | 1.3022974 | 0.1402376  | 4.0578734  |
| C  | 0.9926755 | -1.1734418 | 3.8619576  |
| H  | 0.8843864 | -1.9645268 | 4.5989416  |
| C  | 0.8306648 | -1.3559948 | 2.4430992  |
| N  | 1.0147461 | -0.1615176 | 1.7694923  |
| C  | 1.3097939 | 0.7628328  | 2.7589685  |
| C  | 1.5564605 | 2.1076584  | 2.5469878  |
| Co | 1.0131931 | 0.1319151  | -0.1752503 |
| C  | 4.7630417 | 0.0222835  | -2.1218938 |
| H  | 3.5142975 | 0.8164023  | 0.2265060  |
| H  | 1.0773996 | 3.7825079  | -2.8389014 |
| H  | 1.7843129 | 2.7278406  | 3.4137970  |
| H  | 0.5129845 | -2.4941422 | -3.8122495 |
| H  | 0.5114319 | -3.4555121 | 2.4951199  |
| C  | 6.0450601 | -0.1463001 | -1.3678464 |
| H  | 6.8935186 | -0.1118679 | -2.0772523 |
| H  | 6.0991025 | -1.1091923 | -0.8435116 |
| H  | 6.1958326 | 0.6624929  | -0.6396682 |
| H  | 4.5629611 | 1.0230106  | -2.5084471 |

### TS5'

66

TS5'

|   |           |            |            |
|---|-----------|------------|------------|
| C | 3.1559716 | -0.0370428 | -0.3373327 |
| H | 2.7527871 | 0.1160488  | -1.3280907 |
| C | 3.6098883 | -1.3531169 | 0.1263565  |
| C | 4.2601734 | -3.9323163 | 1.0769787  |
| C | 3.8354002 | -2.4219240 | -0.7955273 |
| C | 3.7897975 | -1.5960142 | 1.4921701  |
| C | 4.1184874 | -2.8696782 | 1.9688916  |
| C | 4.1183532 | -3.7023572 | -0.2941969 |
| H | 3.6165570 | -0.7817825 | 2.1972783  |
| H | 4.2361976 | -3.0289799 | 3.0414673  |
| H | 4.2545585 | -4.5229776 | -1.0009707 |
| H | 4.4863681 | -4.9348965 | 1.4416269  |
| C | 3.7704053 | -2.2095204 | -2.2319765 |
| H | 3.4454726 | -3.0426130 | -2.8572403 |
| C | 4.0969053 | -1.0306958 | -2.8635183 |
| C | 3.7792173 | -0.9832530 | -4.3203155 |
| O | 3.1865269 | -1.8551998 | -4.9382819 |
| O | 4.2309852 | 0.1549904  | -4.9187909 |
| C | 3.8902569 | 0.2814079  | -6.3136820 |
| H | 4.3292443 | 1.2313622  | -6.6358894 |
| H | 2.7988579 | 0.2986265  | -6.4369462 |
| H | 4.3026254 | -0.5554648 | -6.8932640 |
| C | 0.7958763 | 1.6996662  | -2.7854692 |
| N | 0.7387683 | 0.4820247  | -2.1278204 |
| H | 0.6926379 | 2.3259053  | -4.9363945 |

|    |           |            |            |
|----|-----------|------------|------------|
| C  | 0.6166985 | -0.4601861 | -3.1366810 |
| C  | 0.5793181 | 0.1743762  | -4.4279359 |
| H  | 0.4942440 | -0.3640321 | -5.3672212 |
| C  | 0.6833054 | 1.5172638  | -4.2104496 |
| C  | 0.5649406 | -1.8278208 | -2.9443472 |
| N  | 0.6358571 | -1.7825960 | -0.4841866 |
| C  | 0.5505074 | -2.7886518 | 0.4631706  |
| C  | 0.4290178 | -4.0789643 | -0.1678740 |
| H  | 0.3475012 | -5.0198004 | 0.3692860  |
| C  | 0.4472291 | -3.8611847 | -1.5122045 |
| H  | 0.3765354 | -4.5826381 | -2.3215375 |
| C  | 0.5627362 | -2.4363848 | -1.7013924 |
| C  | 0.9997912 | 2.9235555  | -2.1718995 |
| H  | 1.8366834 | 4.8447897  | 1.9318344  |
| C  | 1.6239868 | 4.1345453  | 1.1373793  |
| C  | 1.4424983 | 2.7190153  | 1.3358109  |
| H  | 1.5096297 | 5.3115498  | -0.7322748 |
| N  | 1.1718961 | 2.0827724  | 0.1361783  |
| C  | 1.1883500 | 3.0936430  | -0.8113792 |
| C  | 1.4583406 | 4.3682588  | -0.1951713 |
| C  | 0.5982315 | -2.5994411 | 1.8307830  |
| H  | 1.4334106 | 0.6337434  | 5.0039970  |
| C  | 1.2491663 | 0.1169979  | 4.0659590  |
| C  | 0.9538654 | -1.1982241 | 3.8585797  |
| H  | 0.8493158 | -1.9957571 | 4.5891328  |
| C  | 0.8033465 | -1.3723640 | 2.4373618  |
| N  | 0.9790441 | -0.1709628 | 1.7737858  |
| C  | 1.2599925 | 0.7489507  | 2.7715785  |
| C  | 1.5033103 | 2.0960677  | 2.5701506  |
| Co | 0.9792458 | 0.1384409  | -0.1671357 |
| C  | 4.6498191 | 0.0811173  | -2.1072619 |
| H  | 3.4833781 | 0.8439712  | 0.2135893  |
| H  | 1.0408250 | 3.8098609  | -2.8050751 |
| H  | 1.7243819 | 2.7108050  | 3.4425932  |
| H  | 0.5319638 | -2.4630045 | -3.8280312 |
| H  | 0.5134802 | -3.4767680 | 2.4712101  |
| C  | 4.6290176 | 1.5190917  | -2.5166532 |
| H  | 5.4082300 | 1.7308302  | -3.2683089 |
| H  | 4.8147663 | 2.1637644  | -1.6468087 |
| H  | 3.6675576 | 1.8034947  | -2.9651559 |
| H  | 5.3992653 | -0.1983243 | -1.3624569 |

## TS6

29

TS6

|   |            |            |           |
|---|------------|------------|-----------|
| H | 0.8972045  | 1.6947887  | 0.1240446 |
| C | 0.4433676  | 1.4115444  | 1.0761901 |
| C | -0.7871975 | 0.7217032  | 3.5025457 |
| C | -0.4779307 | 0.3074922  | 1.0835949 |
| C | 0.6260979  | 2.1893656  | 2.1908877 |
| C | -0.0520494 | 1.8746545  | 3.4058282 |
| C | -0.9117731 | -0.1811279 | 2.3885358 |
| H | 1.2616244  | 3.0745887  | 2.1404546 |
| H | 0.0628762  | 2.5252875  | 4.2735935 |
| H | -1.2167309 | 0.4212883  | 4.4603275 |

|   |            |            |            |
|---|------------|------------|------------|
| C | -0.9327143 | -0.2176100 | -0.1166259 |
| H | -1.9556438 | -0.5540346 | -0.2125018 |
| H | -0.4321376 | 0.0524442  | -1.0492714 |
| C | -1.0985560 | -1.5413325 | 2.6811167  |
| H | -1.1739620 | -1.7768921 | 3.7458956  |
| C | -0.8020178 | -2.6570663 | 1.8496935  |
| C | -1.1036298 | -2.7504015 | 0.4930204  |
| H | -2.0392803 | -2.2862523 | 0.2100020  |
| C | -0.1211646 | -3.7650957 | 2.6031417  |
| O | -0.2750304 | -3.9865489 | 3.7923218  |
| O | 0.6918390  | -4.5241423 | 1.8162525  |
| C | 1.3571593  | -5.6079074 | 2.5035487  |
| H | 1.9752186  | -5.2223507 | 3.3253730  |
| H | 0.6228064  | -6.3140249 | 2.9136687  |
| H | 1.9794690  | -6.0925074 | 1.7443154  |
| C | -0.5522263 | -3.7067839 | -0.5208647 |
| H | 0.5433343  | -3.7243707 | -0.5213451 |
| H | -0.9084856 | -3.4354439 | -1.5232594 |
| H | -0.8824670 | -4.7392642 | -0.3154843 |

## TS7

29

TS7

|   |            |            |            |
|---|------------|------------|------------|
| H | 1.1816599  | 1.6483652  | 0.2987823  |
| C | 0.5843002  | 1.4126845  | 1.1821163  |
| C | -0.9879020 | 0.8354368  | 3.4243034  |
| C | -0.2956867 | 0.2765500  | 1.1094606  |
| C | 0.5704541  | 2.2690450  | 2.2530008  |
| C | -0.2770291 | 2.0051366  | 3.3681862  |
| C | -0.9330255 | -0.1345890 | 2.3617685  |
| H | 1.1859771  | 3.1694832  | 2.2405543  |
| H | -0.3140163 | 2.7097092  | 4.2000076  |
| H | -1.5530468 | 0.5791813  | 4.3224673  |
| C | -0.4719752 | -0.3489247 | -0.1201685 |
| H | -1.4378057 | -0.6954534 | -0.4445762 |
| H | 0.2427011  | -0.1403200 | -0.9204856 |
| C | -1.1239938 | -1.4821702 | 2.7084693  |
| H | -1.2140361 | -1.6837482 | 3.7787731  |
| C | -0.8290668 | -2.5990961 | 1.8854441  |
| C | -1.2163612 | -2.7309636 | 0.5570877  |
| C | -0.0284946 | -3.6724602 | 2.5548077  |
| O | 0.1401462  | -3.7653292 | 3.7593930  |
| O | 0.4945154  | -4.5676892 | 1.6662839  |
| C | 1.2973025  | -5.6080941 | 2.2630052  |
| H | 2.1419631  | -5.1766670 | 2.8176189  |
| H | 0.6942713  | -6.2137611 | 2.9531368  |
| H | 1.6545572  | -6.2161225 | 1.4253473  |
| C | -2.6076266 | -2.3912963 | 0.0953371  |
| H | -2.6596073 | -2.1627516 | -0.9793792 |
| H | -3.0508642 | -1.5651938 | 0.6666444  |
| H | -3.2416534 | -3.2814920 | 0.2559721  |
| H | -0.7076568 | -3.4954695 | -0.0343583 |



## TS8

29

| TS8 |            |            |            |
|-----|------------|------------|------------|
| H   | 1.1871595  | 2.4393732  | 0.0302709  |
| C   | 0.7890709  | 1.9472402  | 0.9202641  |
| C   | -0.2966076 | 0.7181553  | 3.1754118  |
| C   | 0.0553749  | 0.7287191  | 0.7348493  |
| C   | 0.9436844  | 2.5257141  | 2.1532846  |
| C   | 0.3610991  | 1.9141546  | 3.2987294  |
| C   | -0.3990531 | 0.0141670  | 1.9227967  |
| H   | 1.4821824  | 3.4689688  | 2.2540564  |
| H   | 0.4507304  | 2.3912857  | 4.2753775  |
| H   | -0.7148325 | 0.2370126  | 4.0619677  |
| C   | -0.1971790 | 0.2801720  | -0.5704688 |
| H   | -1.0326703 | -0.3991717 | -0.7535224 |
| H   | 0.0871992  | 0.9229692  | -1.4063954 |
| C   | -0.9686917 | -1.2785891 | 2.0007293  |
| H   | -1.5299099 | -1.4308102 | 2.9254456  |
| C   | -0.9543283 | -2.4272848 | 1.1711070  |
| C   | -0.0303973 | -2.7822790 | 0.1857293  |
| H   | -0.2678140 | -3.6825937 | -0.3833938 |
| C   | 1.1287434  | -2.0277962 | -0.1617319 |
| H   | 1.8191868  | -2.5103794 | -0.8598522 |
| H   | 1.6432523  | -1.5361429 | 0.6777384  |
| H   | 0.7156508  | -0.9805917 | -0.6688904 |
| C   | -2.0083053 | -3.4804119 | 1.4147035  |
| O   | -2.1695835 | -4.4757640 | 0.7294602  |
| O   | -2.7995685 | -3.2045901 | 2.4904392  |
| C   | -3.8164052 | -4.1923745 | 2.7613996  |
| H   | -4.3617143 | -3.8160257 | 3.6330473  |
| H   | -4.4880791 | -4.3015205 | 1.8992795  |
| H   | -3.3601947 | -5.1676064 | 2.9801677  |

## References in the Supporting Information

- (1) TURBOMOLE Version 7.0.1 (TURBOMOLE GmbH, Karlsruhe, Germany).
- (2) (a) PQS version 2.4, **2001**, Parallel Quantum Solutions, Fayetteville, Arkansas, USA (the Baker optimizer is available separately from PQS upon request); b) Baker, J., *J. Comput. Chem.* **1986**, *7*, 385–395.
- (3) Budzelaar, P. H. M., *J. Comput. Chem.* **2007**, *28*, 2226–2236.
- (4) (a) Becke, A. D., *Phys. Rev. A* **1988**, *38*, 3098–3100. (b) Perdew, J. P., *Phys. Rev. B* **1986**, *33*, 8822–8824.
- (5) (a) Weigend, F.; Ahlrichs, R., *Phys. Chem. Chem. Phys.* **2005**, *7*, 3297–3305. (b) Weigend, F.; Häser, M.; Patzelt, H.; Ahlrichs, R., *Chem. Phys. Lett.* **1998**, *294*, 143–152.
- (6) Grimme, S.; Antony, J.; Ehrlich, S.; Krieg, H., *J. Chem. Phys.* **2010**, *132*, 154104.
- (7) In solution the catalyst is completely surrounded by solvent molecules, leading to small translational entropy contributions to the toluene molecule association/dissociation steps. These are of little influence on the translational entropy contributions associated with substrate/product association/dissociation. Hence, the latter are not canceled by the former in toluene solution.
